# Supplementary material
Source: publisher figshare collection journal article supplement (https://gsajournals.figshare.com/articles/dataset/_/14975118)

Genome-wide association study for morphological, phenological, quality and yield traits in  
einkorn (*Triticum monococcum* L. subsp. *monococcum*)

Andrea Volante<sup>\*1,2</sup>, Delfina Barabaschi<sup>†,2</sup>, Rosanna Marino<sup>‡</sup>, Andrea Brandolini<sup>§</sup>

<sup>\*</sup> CREA - Research Centre for Cereal and Industrial Crops, s.s. 11 to Torino, km 2.5, 13100 Vercelli, Italy. Present  
address: CREA - Research Centre for Vegetable and Ornamental Crops. E-mail: [andrea.volante@crea.gov.it](mailto:andrea.volante@crea.gov.it).

ORCID: 0000-0002-0463-5375

<sup>†</sup> CREA – Research Centre for Genomics and Bioinformatics. E-mail: [delfina.barabaschi@crea.gov.it](mailto:delfina.barabaschi@crea.gov.it). ORCID:

0000-0002-1107-0210

<sup>‡</sup> CREA - Research Centre for Animal Production and Aquaculture. E-mail: [rosanna.marino@crea.gov.it](mailto:rosanna.marino@crea.gov.it). ORCID:

0000-0002-5868-6696

<sup>§</sup> CREA - Research Centre for Animal Production and Aquaculture. E-mail: [andrea.brandolini@crea.gov.it](mailto:andrea.brandolini@crea.gov.it).

ORCID: 0000-0002-4552-4081

**File S3. Manhattan and QQplot resulting from the association analyses for the considered traits.  
These latter are shown in alphabetical order.**

Unmapped markers are labeled “UM”. The red line represents the significance threshold of 0.05  
adjusted for the False Discovery Rate with the Benjamini-Hochberg test (see Materials and Methods  
for details).

---

<sup>1</sup> Present Address: CREA Research Centre for Vegetable and Ornamental Crops, Corso Inglesi 508, 18038  
Sanremo, IM, Italy

<sup>2</sup> These two authors contributed equally to the paper

MLM+K

### AWN

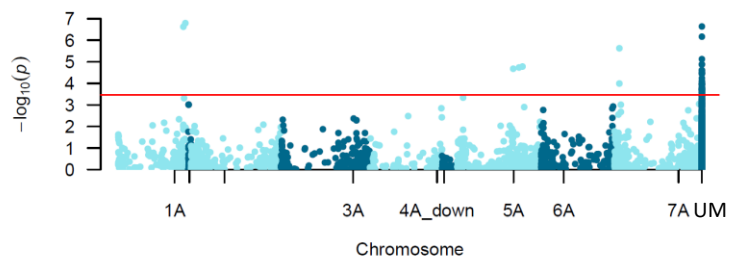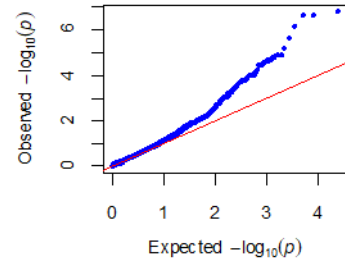

### GLC

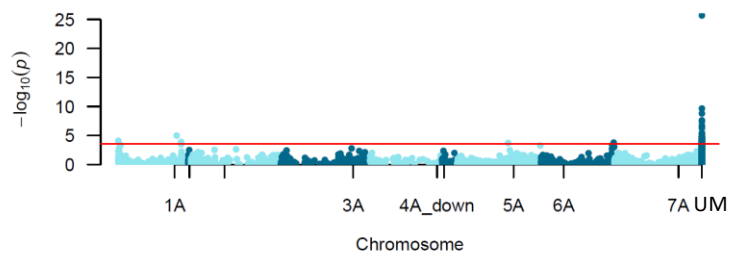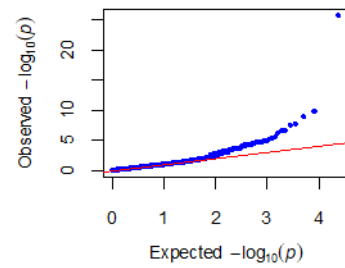

### GLH

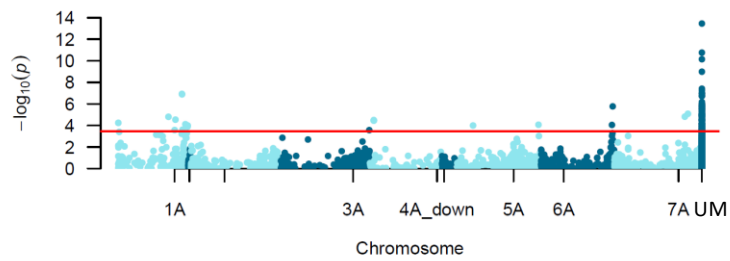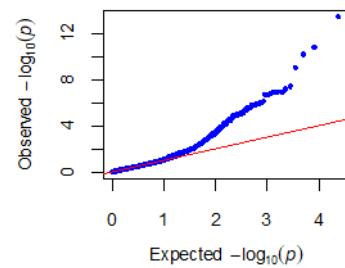

### GRC

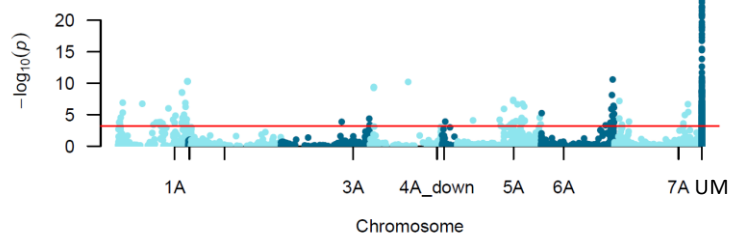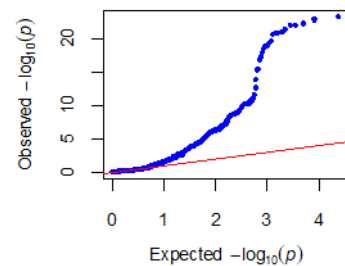

### GRL

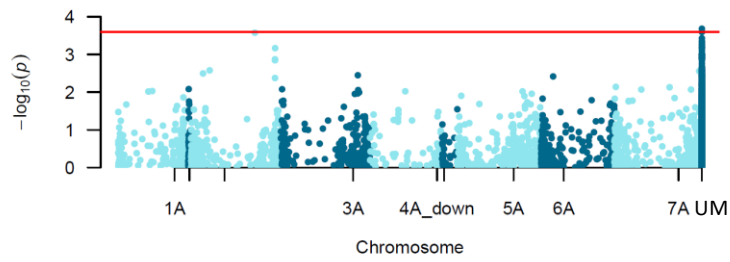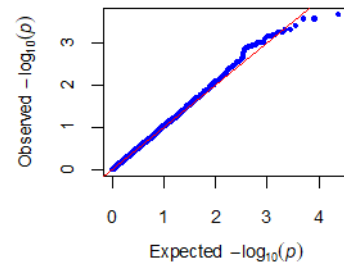

### GRT

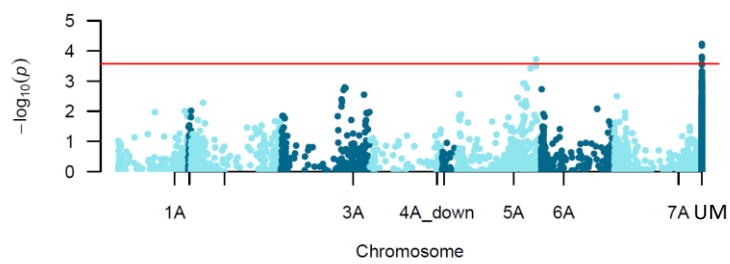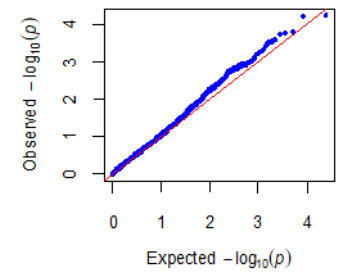

### GRW

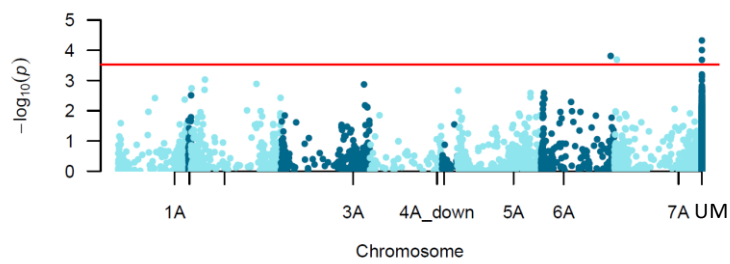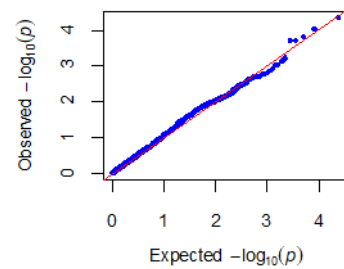

### RAB

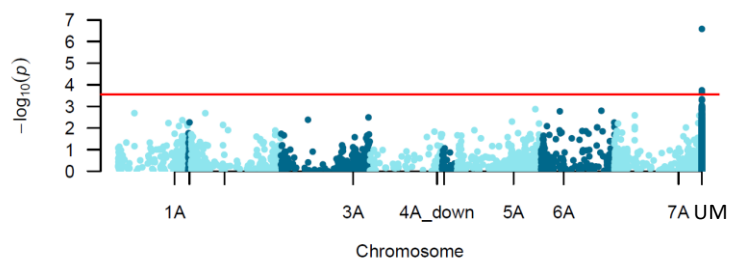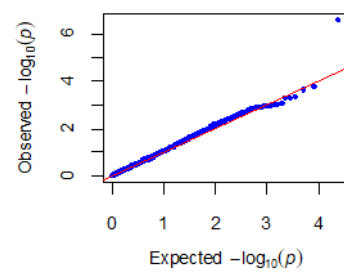

### SPD

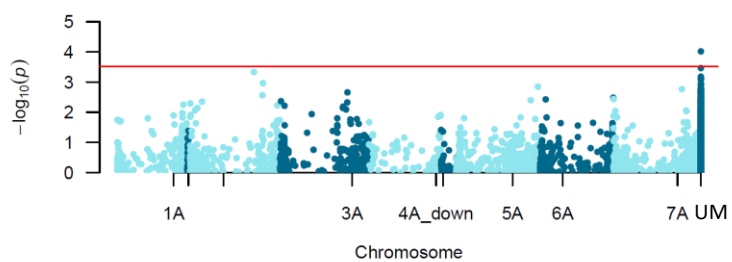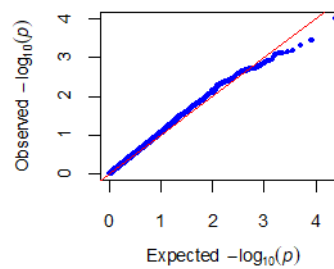

### SPL

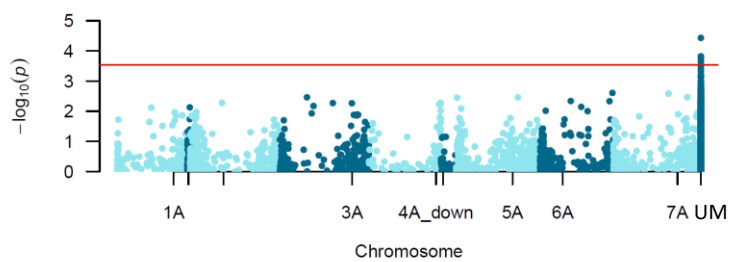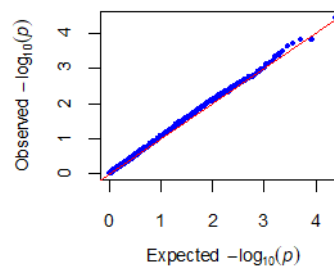

### SSH

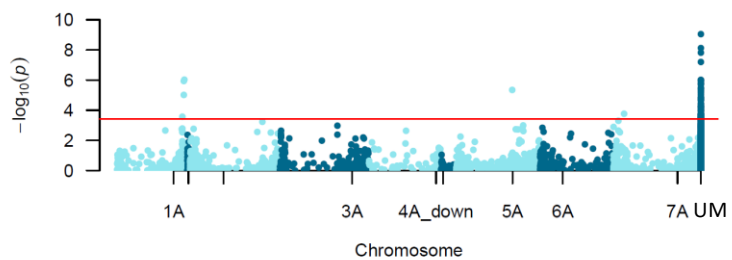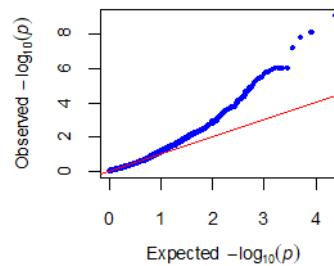

## MLM + K+ PCA

### CAR

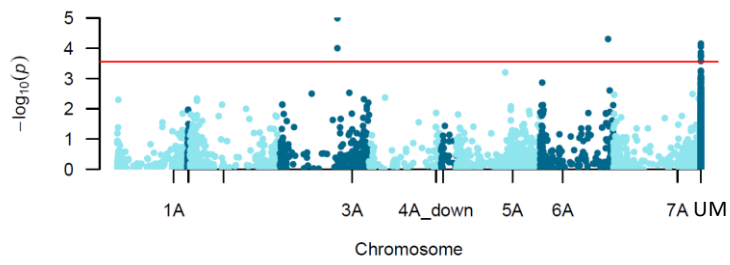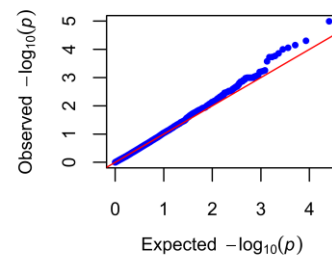

### GRV

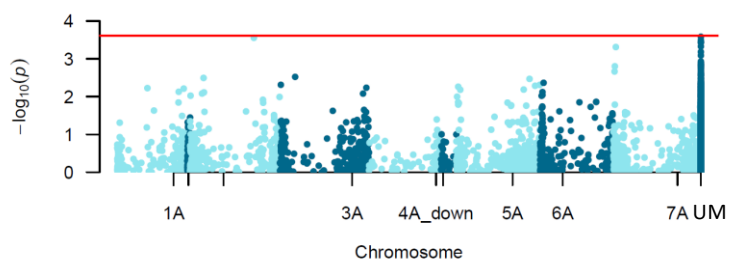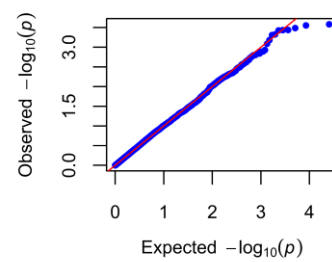

### GTX

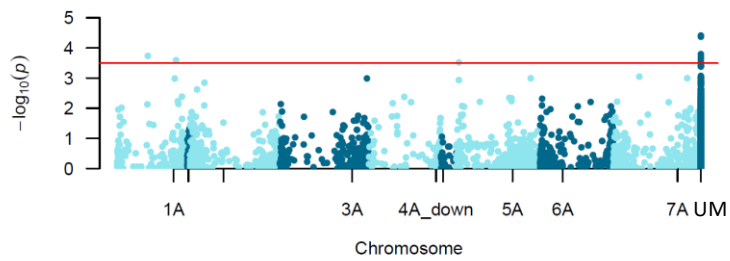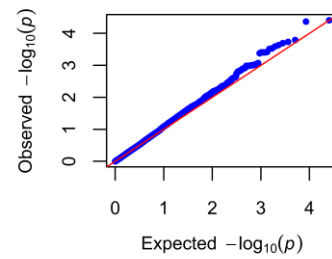

### HDA

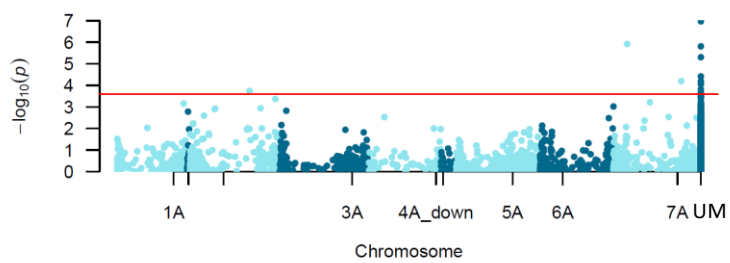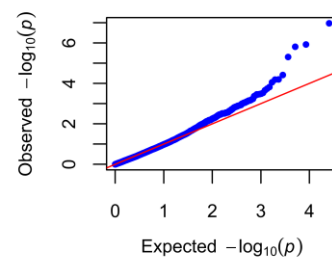

### PLH

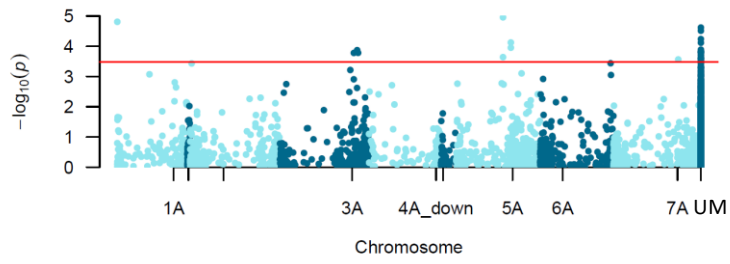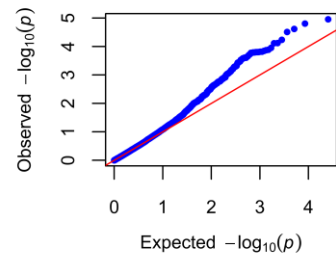

### PRO

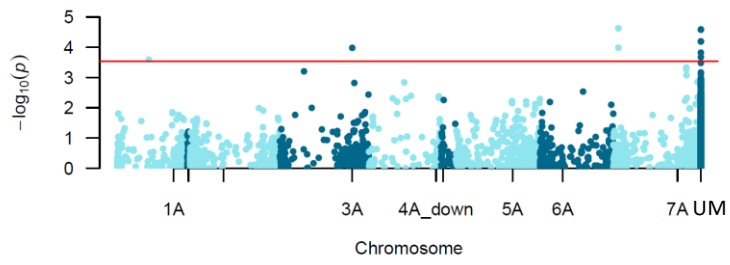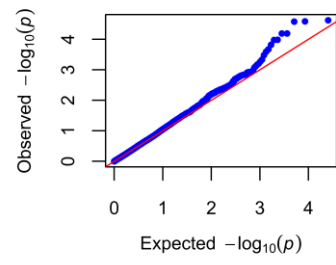

### SDS

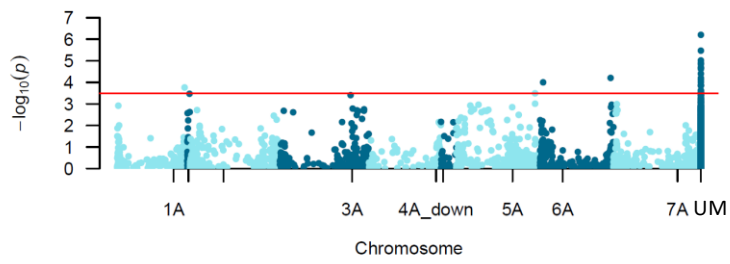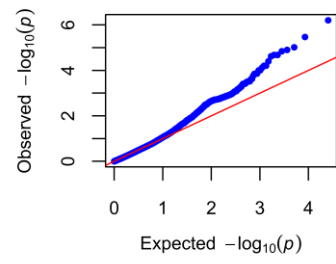

### SPS

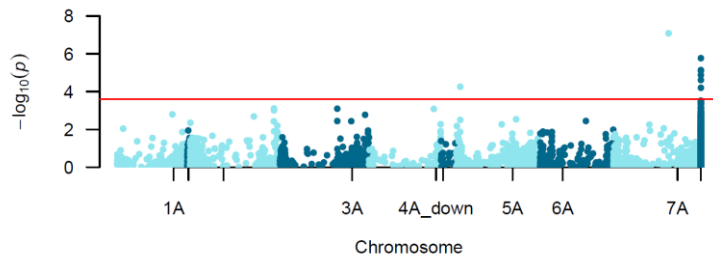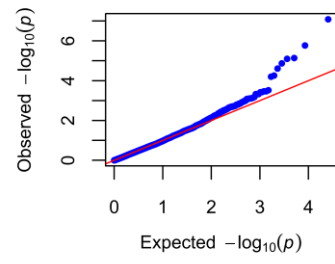

### TGW

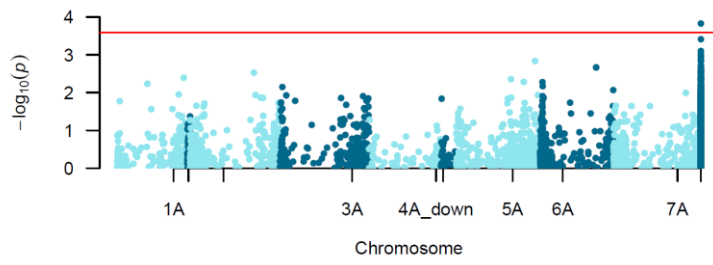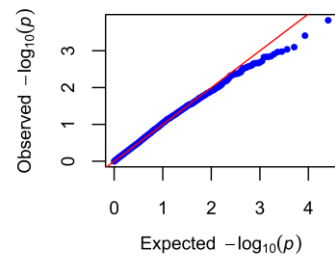

Supplement: Supplementary file 2 [file 1]
