# Supplementary material
Source: publisher figshare collection journal article supplement (https://gsajournals.figshare.com/articles/dataset/_/14975118)
Supplement: Supplementary file 1 [file 1]

## Sheet: Table S4
Genome-wide association study for morphological, phenological, quality and yield traits in einkorn (Triticum monococcum L. subsp. monococcum)
Andrea Volante1*, Delfina Barabaschi†,2, Rosanna Marino‡, Andrea Brandolini§
*Council for Agricultural Research and Economics - Research Centre for Cereal and Industrial Crops. E-mail: andrea.volante@crea.gov.it. ORCID: 0000-0002-0463-5375
†Council for Agricultural Research and Economics – Research Centre for Genomics and Bioinformatics. E-mail: delfina.barabaschi@crea.gov.it. ORCID: 0000-0002-1107-0210
‡Council for Agricultural Research and Economics – Research Centre for Animal Production and Aquaculture. E-mail: rosanna.marino@crea.gov.it. ORCID: 0000-0002-5868-6696
§Council for Agricultural Research and Economics – Research Centre for Animal Production and Aquaculture. E-mail: andrea.brandolini@crea.gov.it. ORCID: 0000-0002-4552-4081
1 Present Address: CREA Research Centre for Vegetable and Ornamental Crops, Corso Inglesi 508, 18038 Sanremo, IM, Italy
* Corresponding author
Table S4_a. Physical position on on Triticum urartu genome (GCA_003073225.1) assigned to DArT markers of T. monococcum
Table S4_b. Physical position on T. monococcum contigs (TGAC WGS monococcum v1) assigned to DArT markers of T. monococcum
Table S4_c. Physical position on T. urartu contigs and T. monococcum genome assigned to peak markers (mapped and unmapped on bread wheat genome)
Table S4_d. Markers associated to multiple traits and physical position on the three considered genomes

## Sheet: a) alignment vs urartu genome
Table S4_a. Physical position on Triticum urartu genome (GCA_003073225.1) assigned to DArT markers of Triticum monococcum
marker	Chr	T. urartu_genome	bitscore	% identity	alignment length	mismatches	gapopens	q.start	q.end	s.start	s.end	evalue	marker order along chromosomes of monococcum physical map
sil_4997920	1	CM009793.1	117	97101	69	2	0	1	69	583025079	583025011	1.92e-26
sil_1091952	1	CM009793.1	128	100000	69	0	0	1	69	581217445	581217377	4.12e-28	1
sil_3940413	1	CM009793.1	117	97101	69	2	0	1	69	580703392	580703460	8.92e-25	2
sil_2264154	1	CM009793.1	122	98551	69	1	0	1	69	580703392	580703460	4.12e-28				marker number on T. urartu genome
sil_2262791	1	CM009793.1	117	97101	69	2	0	1	69	574794094	574794162	4.12e-28	7		Chr
sil_1267032	1	CM009793.1	117	97101	69	2	0	1	69	574654625	574654693	4.12e-28			1	190
sil_5003143	1	CM009793.1	121	98529	68	1	0	2	69	573918587	573918654	4.12e-28	5		2	342
sil_1102137	1	CM009793.1	122	98551	69	1	0	1	69	572201436	572201368	4.12e-28			3	245
sil_2275401	1	CM009793.1	128	100000	69	0	0	1	69	571526254	571526186	4.12e-28	11		4	107
sil_1163488	1	CM009793.1	122	98551	69	1	0	1	69	570233958	570233890	1.92e-26	9		5	266
SNP_1239222	1	CM009793.1	128	100000	69	0	0	1	69	569625347	569625279	4.12e-28	13		6	208
sil_1137792	1	CM009793.1	117	97101	69	2	0	1	69	569095945	569095877	1.92e-26			7	315
sil_5009949	1	CM009793.1	117	97101	69	2	0	1	69	568556472	568556404	4.12e-28				1673
SNP_100007371	1	CM009793.1	117	97101	69	2	0	1	69	567895095	567895163	5.33e-27
sil_1092394	1	CM009793.1	128	100000	69	0	0	1	69	564568385	564568317	1.48e-27	35
sil_3571893	1	CM009793.1	117	97101	69	2	0	1	69	564564819	564564751	1.92e-26	34
sil_5007323	1	CM009793.1	113	97015	67	2	0	1	67	563515450	563515384	1.92e-26
sil_1089615	1	CM009793.1	113	97015	67	2	0	2	68	562462597	562462531	4.12e-28
sil_1221051	1	CM009793.1	128	100000	69	0	0	1	69	561566565	561566633	3.21e-24	21
sil_4994089	1	CM009793.1	117	97101	69	2	0	1	69	561494662	561494594	4.12e-28	22
sil_1022953	1	CM009793.1	124	100000	67	0	0	1	67	560907303	560907237	4.12e-28
sil_992228	1	CM009793.1	117	97101	69	2	0	1	69	560906719	560906651	1.92e-26	23
SNP_100006046	1	CM009793.1	117	97101	69	2	0	1	69	558387566	558387634	1.15e-23
sil_1106982	1	CM009793.1	128	100000	69	0	0	1	69	556626560	556626628	4.12e-28	24
sil_2263451	1	CM009793.1	122	98551	69	1	0	1	69	555704397	555704329	4.12e-28	26
sil_1119419	1	CM009793.1	122	98551	69	1	0	1	69	553273966	553274034	4.12e-28	29
sil_2262660	1	CM009793.1	128	100000	69	0	0	1	69	553271329	553271261	1.92e-26	30
SNP_100017222	1	CM009793.1	117	97101	69	2	0	1	69	553271326	553271394	4.12e-28	31
sil_1699284	1	CM009793.1	128	100000	69	0	0	1	69	552108674	552108742	1.92e-26	32
sil_4994240	1	CM009793.1	124	100000	67	0	0	1	67	551948537	551948471	4.12e-28
sil_1100056	1	CM009793.1	122	98551	69	1	0	1	69	549194061	549193993	4.12e-28	37
SNP_100005162	1	CM009793.1	122	98551	69	1	0	1	69	546138895	546138963	4.12e-28	38
SNP_1122739	1	CM009793.1	128	100000	69	0	0	1	69	544552583	544552515	1.92e-26	39
sil_3572440	1	CM009793.1	128	100000	69	0	0	1	69	543880919	543880987	4.12e-28
SNP_4261105	1	CM009793.1	128	100000	69	0	0	1	69	542957134	542957202	1.92e-26	41
sil_5009767	1	CM009793.1	117	98485	66	1	0	4	69	542161710	542161645	3.21e-24	40
sil_1089207	1	CM009793.1	122	98551	69	1	0	1	69	540274917	540274985	4.12e-28	43
sil_1089724	1	CM009793.1	122	98551	69	1	0	1	69	540273171	540273239	8.92e-25	44
sil_1092344	1	CM009793.1	117	97101	69	2	0	1	69	539571999	539571931	4.12e-28	49
sil_1090129	1	CM009793.1	115	97059	68	2	0	2	69	539571997	539572064	6.90e-26	50
SNP_2276278	1	CM009793.1	128	100000	69	0	0	1	69	539453944	539454012	8.92e-25	51
sil_1204074	1	CM009793.1	128	100000	69	0	0	1	69	539327884	539327816	4.12e-28	52
SNP_3574515	1	CM009793.1	115	97059	68	2	0	1	68	538627446	538627513	4.12e-28	60
sil_1228704	1	CM009793.1	117	97101	69	2	0	1	69	538469563	538469495	8.92e-25
sil_4999299	1	CM009793.1	117	97101	69	2	0	1	69	537178136	537178068	3.21e-24	57
sil_4999109	1	CM009793.1	117	97101	69	2	0	1	69	537178136	537178068	1.92e-26	56
sil_1216164	1	CM009793.1	122	98551	69	1	0	1	69	537178136	537178068	4.12e-28	55
SNP_1048250	1	CM009793.1	128	100000	69	0	0	1	69	536764878	536764946	1.92e-26	58
SNP_100023238	1	CM009793.1	117	97101	69	2	0	1	69	536554193	536554125	4.12e-28	59
SNP_1666638	1	CM009793.1	124	100000	67	0	0	1	67	535523743	535523809	4.12e-28
sil_4538798	1	CM009793.1	121	98529	68	1	0	1	68	535407623	535407556	1.92e-26	62
sil_4537905	1	CM009793.1	121	98529	68	1	0	1	68	535407623	535407556	1.92e-26	61
sil_5009824	1	CM009793.1	113	97015	67	2	0	1	67	535407620	535407686	4.12e-28
SNP_100005218	1	CM009793.1	117	97101	69	2	0	1	69	535360975	535361043	1.92e-26
sil_1034084	1	CM009793.1	128	100000	69	0	0	1	69	535360928	535360860	4.12e-28	63
SNP_2298023	1	CM009793.1	126	100000	68	0	0	1	68	533574566	533574633	1.92e-26	64
sil_1076473	1	CM009793.1	128	100000	69	0	0	1	69	531832151	531832083	4.12e-28	67
SNP_1066673	1	CM009793.1	128	100000	69	0	0	1	69	529924861	529924929	4.12e-28	68
SNP_100057721	1	CM009793.1	128	100000	69	0	0	1	69	529056914	529056982	1.92e-26	69
SNP_993221	1	CM009793.1	117	97101	69	2	0	1	69	528720174	528720242	1.92e-26	70
sil_1046301	1	CM009793.1	128	100000	69	0	0	1	69	526794536	526794604	4.12e-28	72
SNP_986586	1	CM009793.1	128	100000	69	0	0	1	69	525697469	525697401	1.92e-26	76
sil_1054902	1	CM009793.1	122	98551	69	1	0	1	69	525230028	525229960	4.12e-28	77
sil_1019140	1	CM009793.1	128	100000	69	0	0	1	69	525229020	525229088	4.12e-28
SNP_2290270	1	CM009793.1	128	100000	69	0	0	1	69	524599930	524599862	6.90e-26	78
SNP_1037441	1	CM009793.1	128	100000	69	0	0	1	69	524599927	524599995	4.12e-28	79
SNP_2282530	1	CM009793.1	128	100000	69	0	0	1	69	524172068	524172000	1.92e-26	80
SNP_100007744	1	CM009793.1	126	100000	68	0	0	2	69	524108751	524108684	4.12e-28	81
SNP_2248861	1	CM009793.1	128	100000	69	0	0	1	69	515822701	515822769	1.92e-26
sil_5008255	1	CM009793.1	126	100000	68	0	0	2	69	513706026	513705959	1.92e-26
SNP_100003565	1	CM009793.1	117	97101	69	2	0	1	69	511171323	511171255	1.92e-26	84
sil_4995692	1	CM009793.1	117	97101	69	2	0	1	69	509055355	509055287	4.12e-28	90
SNP_1065958	1	CM009793.1	121	98529	68	1	0	2	69	508201819	508201752	1.92e-26	85
SNP_1863652	1	CM009793.1	128	100000	69	0	0	1	69	506157252	506157184	4.12e-28	87
sil_1103494	1	CM009793.1	117	98485	66	1	0	1	66	505443992	505444057	1.92e-26
sil_2256663	1	CM009793.1	122	98551	69	1	0	1	69	505443941	505443873	1.92e-26
sil_3570844	1	CM009793.1	122	98551	69	1	0	1	69	505443938	505444006	8.92e-25
sil_1146411	1	CM009793.1	117	97101	69	2	0	1	69	505239308	505239376	8.92e-25	92
sil_5009172	1	CM009793.1	121	98529	68	1	0	2	69	492669686	492669619	8.92e-25
SNP_989876	1	CM009793.1	122	98551	69	1	0	1	69	482587367	482587299	4.12e-28	99
SNP_100017762	1	CM009793.1	128	100000	69	0	0	1	69	480880200	480880132	4.12e-28	100
SNP_2276636	1	CM009793.1	119	98507	67	1	0	1	67	480695856	480695790	4.12e-28
SNP_2288980	1	CM009793.1	128	100000	69	0	0	1	69	479212788	479212720	4.12e-28	101
SNP_100003069	1	CM009793.1	117	97101	69	2	0	1	69	476891657	476891589	1.92e-26
SNP_100010183	1	CM009793.1	115	97059	68	2	0	2	69	474688846	474688779	4.12e-28	103
sil_1861978	1	CM009793.1	124	100000	67	0	0	3	69	473780218	473780152	4.12e-28
sil_5010151	1	CM009793.1	128	100000	69	0	0	1	69	473166749	473166817	1.92e-26	104
SNP_100002541	1	CM009793.1	117	97101	69	2	0	1	69	471612826	471612758	6.90e-26	105
sil_4995704	1	CM009793.1	113	97015	67	2	0	1	67	465916793	465916727	8.92e-25
sil_1020335	1	CM009793.1	128	100000	69	0	0	1	69	465861437	465861369	4.12e-28	106
SNP_100001492	1	CM009793.1	122	98551	69	1	0	1	69	465803928	465803860	4.12e-28
SNP_1089518	1	CM009793.1	128	100000	69	0	0	1	69	465796465	465796533	1.92e-26	107
SNP_100009765	1	CM009793.1	113	97015	67	2	0	3	69	465400195	465400129	4.12e-28
SNP_100111223	1	CM009793.1	117	97101	69	2	0	1	69	463753171	463753103	4.12e-28
SNP_2258338	1	CM009793.1	122	98551	69	1	0	1	69	462588732	462588800	1.92e-26	108
SNP_2256752	1	CM009793.1	122	98551	69	1	0	1	69	462506986	462507054	8.92e-25	109
sil_992487	1	CM009793.1	122	98551	69	1	0	1	69	453925032	453924964	5.33e-27	110
SNP_3574272	1	CM009793.1	121	98551	69	0	1	1	69	453424509	453424442	4.12e-28	111
SNP_100002184	1	CM009793.1	122	98551	69	1	0	1	69	445106048	445105980	4.12e-28	112
sil_4998947	1	CM009793.1	119	98507	67	1	0	3	69	438217608	438217542	4.12e-28
sil_4995088	1	CM009793.1	119	98507	67	1	0	3	69	438217608	438217542	4.12e-28
sil_3570665	1	CM009793.1	122	98551	69	1	0	1	69	434648648	434648716	8.92e-25
sil_3572065	1	CM009793.1	117	97101	69	2	0	1	69	434345964	434346032	1.92e-26
sil_1079096	1	CM009793.1	117	97101	69	2	0	1	69	432574870	432574938	3.21e-24
SNP_100013009	1	CM009793.1	117	97101	69	2	0	1	69	427651363	427651431	1.92e-26
sil_2276183	1	CM009793.1	122	98551	69	1	0	1	69	417227082	417227014	4.12e-28	113
sil_1008166	1	CM009793.1	122	98551	69	1	0	1	69	403539210	403539278	1.92e-26	115
SNP_2252437	1	CM009793.1	128	100000	69	0	0	1	69	392963244	392963176	4.12e-28	116
SNP_100003939	1	CM009793.1	117	97101	69	2	0	1	69	392043463	392043395	4.12e-28	118
sil_5001332	1	CM009793.1	117	97101	69	2	0	1	69	392043463	392043395	4.12e-28	117
sil_1217762	1	CM009793.1	122	98551	69	1	0	1	69	390115952	390116020	1.92e-26	119
sil_4406711	1	CM009793.1	117	97101	69	2	0	1	69	377168119	377168187	1.15e-23
sil_2275320	1	CM009793.1	128	100000	69	0	0	1	69	376527071	376527139	1.92e-26	124
SNP_1087379	1	CM009793.1	128	100000	69	0	0	1	69	373144015	373144083	5.33e-27	125
sil_3573113	1	CM009793.1	113	97015	67	2	0	3	69	368306088	368306022	4.12e-28	126
sil_5005702	1	CM009793.1	113	97015	67	2	0	1	67	368096541	368096475	1.92e-26
sil_1149893	1	CM009793.1	119	98507	67	1	0	1	67	368096541	368096475	4.12e-28
sil_1073129	1	CM009793.1	128	100000	69	0	0	1	69	358328823	358328891	4.12e-28	127
sil_3573128	1	CM009793.1	122	98551	69	1	0	1	69	357278645	357278577	8.92e-25	129
sil_5001879	1	CM009793.1	122	98551	69	1	0	1	69	357277687	357277755	4.12e-28	130
SNP_100006432	1	CM009793.1	122	98551	69	1	0	1	69	355935718	355935786	4.12e-28	131
sil_1114503	1	CM009793.1	124	100000	67	0	0	3	69	347892702	347892768	4.12e-28
SNP_2275173	1	CM009793.1	115	97101	69	1	1	1	69	346673650	346673717	1.48e-27	132
sil_3943788	1	CM009793.1	128	100000	69	0	0	1	69	340978076	340978144	4.12e-28	133
sil_1283361	1	CM009793.1	117	97101	69	2	0	1	69	325169441	325169373	4.12e-28
SNP_3575158	1	CM009793.1	117	98485	66	1	0	1	66	321922775	321922840	8.92e-25
SNP_100004390	1	CM009793.1	122	98551	69	1	0	1	69	317087927	317087995	4.12e-28	134
SNP_980524	1	CM009793.1	128	100000	69	0	0	1	69	297251987	297251919	4.12e-28
sil_1272736	1	CM009793.1	122	98551	69	1	0	1	69	291836895	291836827	8.92e-25
sil_3575496	1	CM009793.1	115	97059	68	2	0	1	68	290484933	290484866	4.12e-28	142
sil_1070716	1	CM009793.1	122	98551	69	1	0	1	69	289464951	289465019	6.90e-26
SNP_2306600	1	CM009793.1	128	100000	69	0	0	1	69	286996368	286996436	4.12e-28	136
SNP_3574869	1	CM009793.1	115	97059	68	2	0	2	69	285594413	285594346	4.12e-28	139
sil_983135	1	CM009793.1	128	100000	69	0	0	1	69	277268587	277268519	4.12e-28	141
sil_4996655	1	CM009793.1	117	97101	69	2	0	1	69	273348316	273348384	1.92e-26	140
sil_1065414	1	CM009793.1	128	100000	69	0	0	1	69	270707290	270707222	4.12e-28
sil_5010374	1	CM009793.1	122	98551	69	1	0	1	69	250964873	250964941	1.92e-26	137
sil_3571392	1	CM009793.1	128	100000	69	0	0	1	69	246760805	246760737	4.12e-28
SNP_2247755	1	CM009793.1	128	100000	69	0	0	1	69	229135511	229135443	4.12e-28	147
sil_1081273	1	CM009793.1	117	97101	69	2	0	1	69	224167302	224167234	4.12e-28
sil_1071409	1	CM009793.1	128	100000	69	0	0	1	69	187893533	187893601	4.12e-28
sil_5006378	1	CM009793.1	128	100000	69	0	0	1	69	175997499	175997431	4.12e-28	146
sil_5010611	1	CM009793.1	119	98507	67	1	0	3	69	133356825	133356891	4.12e-28
sil_4996899	1	CM009793.1	128	100000	69	0	0	1	69	116193531	116193599	1.92e-26
sil_4994462	1	CM009793.1	117	97101	69	2	0	1	69	108370736	108370668	4.12e-28	153
SNP_1017281	1	CM009793.1	124	100000	67	0	0	1	67	107839572	107839638	1.92e-26
sil_1221299	1	CM009793.1	122	98551	69	1	0	1	69	71046162	71046230	4.12e-28
sil_3944829	1	CM009793.1	122	98551	69	1	0	1	69	54021847	54021915	4.12e-28	157
sil_2277328	1	CM009793.1	128	100000	69	0	0	1	69	51433235	51433303	4.12e-28	158
sil_1056555	1	CM009793.1	128	100000	69	0	0	1	69	50502706	50502774	4.12e-28
sil_1119839	1	CM009793.1	122	98551	69	1	0	1	69	40551085	40551153	4.12e-28	160
sil_1071569	1	CM009793.1	128	100000	69	0	0	1	69	40304976	40304908	1.92e-26	161
SNP_1103151	1	CM009793.1	128	100000	69	0	0	1	69	32464435	32464503	1.92e-26	164
sil_3573051	1	CM009793.1	119	98507	67	1	0	3	69	31982491	31982425	1.92e-26
sil_1697246	1	CM009793.1	124	100000	67	0	0	1	67	29469138	29469072	6.90e-26
sil_1194975	1	CM009793.1	128	100000	69	0	0	1	69	29468137	29468069	4.12e-28
SNP_1326684	1	CM009793.1	128	100000	69	0	0	1	69	27829053	27828985	5.33e-27	166
sil_1698138	1	CM009793.1	117	97101	69	2	0	1	69	26744795	26744863	1.92e-26	168
sil_1089045	1	CM009793.1	128	100000	69	0	0	1	69	26738065	26738133	1.48e-27	169
SNP_3534358	1	CM009793.1	128	100000	69	0	0	1	69	26397462	26397530	4.12e-28	170
sil_992286	1	CM009793.1	126	100000	68	0	0	1	68	26190320	26190253	8.92e-25	173
sil_1081222	1	CM009793.1	128	100000	69	0	0	1	69	25581702	25581634	8.92e-25	172
SNP_1151033	1	CM009793.1	128	100000	69	0	0	1	69	20964545	20964613	8.92e-25	175
sil_1054654	1	CM009793.1	124	100000	67	0	0	3	69	20897230	20897296	1.92e-26	176
SNP_1052695	1	CM009793.1	122	98551	69	1	0	1	69	20468074	20468142	8.92e-25	177
sil_1020586	1	CM009793.1	117	97101	69	2	0	1	69	19999919	19999851	4.12e-28	178
SNP_1070756	1	CM009793.1	128	100000	69	0	0	1	69	19002594	19002526	8.92e-25	180
sil_2277540	1	CM009793.1	128	100000	69	0	0	1	69	17239588	17239656	1.92e-26
sil_1117195	1	CM009793.1	113	97015	67	2	0	3	69	15999707	15999773	4.12e-28
sil_2304892	1	CM009793.1	122	100000	66	0	0	1	66	14454015	14453950	4.12e-28
sil_992137	1	CM009793.1	122	98551	69	1	0	1	69	14401236	14401168	4.12e-28	182
sil_4411795	1	CM009793.1	122	98551	69	1	0	1	69	14317712	14317780	8.92e-25	185
sil_4406449	1	CM009793.1	122	98551	69	1	0	1	69	14317712	14317780	1.48e-27	184
sil_1108323	1	CM009793.1	117	97101	69	2	0	1	69	14301724	14301792	4.12e-28	186
sil_3570342	1	CM009793.1	117	97101	69	2	0	1	69	13362285	13362353	1.92e-26	187
SNP_1054423	1	CM009793.1	122	98551	69	1	0	1	69	12975827	12975759	4.12e-28	193
sil_4410650	1	CM009793.1	128	100000	69	0	0	1	69	12775549	12775481	1.92e-26
sil_5006844	1	CM009793.1	117	97101	69	2	0	1	69	12024987	12024919	1.48e-27
sil_1107257	1	CM009793.1	128	100000	69	0	0	1	69	11541875	11541807	4.12e-28	195
sil_5003065	1	CM009793.1	128	100000	69	0	0	1	69	11540843	11540775	1.92e-26	194
sil_1119512	1	CM009793.1	126	100000	68	0	0	1	68	11169781	11169848	1.48e-27	196
sil_3570668	1	CM009793.1	117	97101	69	2	0	1	69	8864414	8864482	1.92e-26
sil_3030304	1	CM009793.1	128	100000	69	0	0	1	69	7505619	7505687	1.92e-26	198
sil_4998287	1	CM009793.1	117	97101	69	2	0	1	69	6447633	6447701	1.92e-26
sil_5001806	1	CM009793.1	122	98551	69	1	0	1	69	5978381	5978313	4.12e-28	200
sil_1860594	1	CM009793.1	122	98551	69	1	0	1	69	4492012	4491944	1.92e-26	203
sil_3573205	1	CM009793.1	115	97059	68	2	0	1	68	3206093	3206160	8.92e-25	201
sil_1252727	1	CM009793.1	117	97101	69	2	0	1	69	2911810	2911878	8.92e-25
sil_5002384	1	CM009793.1	122	98551	69	1	0	1	69	1504401	1504333	1.92e-26
sil_1266929	1	CM009793.1	128	100000	69	0	0	1	69	138682	138614	1.92e-26
SNP_1020730	2	CM009794.1	128	100000	69	0	0	1	69	1298695	1298763	4.12e-28	1
sil_1319353	2	CM009794.1	122	98551	69	1	0	1	69	1835967	1836035	4.12e-28
SNP_1107144	2	CM009794.1	128	100000	69	0	0	1	69	2668999	2668931	4.12e-28	3
sil_1860957	2	CM009794.1	128	100000	69	0	0	1	69	3182989	3182921	1.92e-26
sil_1238501	2	CM009794.1	128	100000	69	0	0	1	69	3318467	3318535	4.12e-28	7
sil_1110007	2	CM009794.1	122	98551	69	1	0	1	69	3359687	3359755	1.92e-26	6
sil_4996992	2	CM009794.1	122	98551	69	1	0	1	69	3370851	3370783	8.92e-25	5
sil_1020490	2	CM009794.1	122	98551	69	1	0	1	69	3377240	3377308	1.92e-26	4
SNP_1861779	2	CM009794.1	117	97101	69	2	0	1	69	3749036	3749104	4.12e-28
sil_5007431	2	CM009794.1	115	97059	68	2	0	2	69	3751362	3751295	4.12e-28	18
sil_2276157	2	CM009794.1	122	98551	69	1	0	1	69	4993636	4993704	1.92e-26	14
sil_3572408	2	CM009794.1	117	97101	69	2	0	1	69	5050513	5050445	1.92e-26
sil_1259473	2	CM009794.1	122	98551	69	1	0	1	69	5233884	5233952	4.12e-28	12
sil_1129613	2	CM009794.1	128	100000	69	0	0	1	69	5330737	5330805	1.92e-26	11
sil_1235929	2	CM009794.1	128	100000	69	0	0	1	69	5432038	5432106	4.12e-28	10
sil_1094463	2	CM009794.1	117	98485	66	1	0	1	66	5800441	5800506	2.48e-25
sil_4999480	2	CM009794.1	113	97015	67	2	0	1	67	6198812	6198878	6.90e-26
sil_1265409	2	CM009794.1	122	98551	69	1	0	1	69	7186492	7186424	1.92e-26
sil_1860790	2	CM009794.1	117	97101	69	2	0	1	69	10471216	10471148	4.12e-28	21
sil_3573651	2	CM009794.1	122	98551	69	1	0	1	69	10978806	10978738	4.12e-28
sil_1400647	2	CM009794.1	128	100000	69	0	0	1	69	11024637	11024705	4.12e-28
sil_4998190	2	CM009794.1	128	100000	69	0	0	1	69	11036527	11036595	1.92e-26
sil_1229789	2	CM009794.1	117	97101	69	2	0	1	69	12375449	12375381	4.12e-28
sil_1861570	2	CM009794.1	117	97101	69	2	0	1	69	12694750	12694818	4.12e-28
sil_1265502	2	CM009794.1	121	98529	68	1	0	1	68	12981860	12981927	4.12e-28
SNP_3946903	2	CM009794.1	128	100000	69	0	0	1	69	13472180	13472248	1.92e-26	26
sil_993147	2	CM009794.1	128	100000	69	0	0	1	69	15800304	15800236	4.12e-28
sil_1265565	2	CM009794.1	128	100000	69	0	0	1	69	16097139	16097207	1.92e-26
sil_4995930	2	CM009794.1	122	98551	69	1	0	1	69	16377564	16377632	4.12e-28
sil_4008100	2	CM009794.1	128	100000	69	0	0	1	69	17267532	17267600	1.92e-26
sil_2276660	2	CM009794.1	122	98551	69	1	0	1	69	17269290	17269358	1.15e-23
sil_1860691	2	CM009794.1	115	97101	69	1	1	1	69	17787375	17787442	4.12e-28
sil_5003403	2	CM009794.1	117	97101	69	2	0	1	69	17951580	17951512	8.92e-25
sil_5001875	2	CM009794.1	122	98551	69	1	0	1	69	18002522	18002590	4.12e-28
sil_4994067	2	CM009794.1	124	100000	67	0	0	3	69	18025847	18025913	4.12e-28
sil_1108603	2	CM009794.1	122	98551	69	1	0	1	69	18283206	18283274	4.12e-28
sil_1266618	2	CM009794.1	128	100000	69	0	0	1	69	18283209	18283141	1.92e-26
sil_1860308	2	CM009794.1	121	98551	69	0	1	1	69	18466026	18465959	4.12e-28
sil_5001814	2	CM009794.1	115	97101	69	0	1	1	69	20607558	20607624	1.92e-26	30
sil_1275588	2	CM009794.1	122	98551	69	1	0	1	69	20876109	20876041	4.12e-28
sil_1208130	2	CM009794.1	121	98529	68	1	0	2	69	21298679	21298612	4.12e-28
sil_1861091	2	CM009794.1	115	97059	68	2	0	2	69	21298679	21298612	1.92e-26
sil_4394494	2	CM009794.1	122	98551	69	1	0	1	69	22124920	22124852	4.12e-28
sil_1101880	2	CM009794.1	122	98551	69	1	0	1	69	22730033	22730101	4.12e-28	34
sil_1764551	2	CM009794.1	122	98551	69	1	0	1	69	22837904	22837972	4.12e-28	35
SNP_2295852	2	CM009794.1	122	100000	66	0	0	1	66	23757739	23757674	4.12e-28
sil_1115524	2	CM009794.1	117	97101	69	2	0	1	69	23964705	23964773	4.12e-28	40
sil_988170	2	CM009794.1	122	98551	69	1	0	1	69	24302509	24302577	8.92e-25	42
sil_983486	2	CM009794.1	124	100000	67	0	0	1	67	24715413	24715347	4.12e-28
SNP_1194094	2	CM009794.1	117	97101	69	2	0	1	69	26443195	26443127	4.12e-28	44
sil_1055111	2	CM009794.1	122	98551	69	1	0	1	69	26951326	26951394	8.92e-25	45
sil_4997912	2	CM009794.1	117	97101	69	2	0	1	69	26973418	26973486	4.12e-28
sil_981872	2	CM009794.1	128	100000	69	0	0	1	69	27083688	27083756	1.92e-26	47
sil_1281718	2	CM009794.1	117	97101	69	2	0	1	69	27776962	27776894	1.92e-26
sil_2306298	2	CM009794.1	122	98551	69	1	0	1	69	28163057	28163125	1.92e-26	48
SNP_100013583	2	CM009794.1	122	98551	69	1	0	1	69	29185667	29185599	8.92e-25	49
sil_1667819	2	CM009794.1	128	100000	69	0	0	1	69	30193525	30193593	4.12e-28
sil_4996794	2	CM009794.1	124	100000	67	0	0	1	67	30219386	30219320	4.12e-28
sil_5002935	2	CM009794.1	128	100000	69	0	0	1	69	30225052	30224984	2.48e-25
sil_5003175	2	CM009794.1	128	100000	69	0	0	1	69	30371244	30371312	1.92e-26
sil_2293563	2	CM009794.1	121	98529	68	1	0	1	68	31047097	31047030	2.48e-25	52
sil_3570427	2	CM009794.1	122	98551	69	1	0	1	69	31096206	31096274	4.12e-28
sil_2257141	2	CM009794.1	117	97101	69	2	0	1	69	32278539	32278607	4.12e-28	54
sil_1119700	2	CM009794.1	121	98529	68	1	0	1	68	33126936	33127003	4.12e-28	29
SNP_3574185	2	CM009794.1	124	100000	67	0	0	1	67	34379325	34379259	4.12e-28
SNP_2248034	2	CM009794.1	128	100000	69	0	0	1	69	34445634	34445566	1.92e-26	58
sil_1056176	2	CM009794.1	122	98551	69	1	0	1	69	34548214	34548282	4.12e-28
sil_2303384	2	CM009794.1	128	100000	69	0	0	1	69	34554935	34554867	4.12e-28	61
SNP_2249228	2	CM009794.1	128	100000	69	0	0	1	69	34685781	34685713	1.92e-26	60
SNP_983272	2	CM009794.1	128	100000	69	0	0	1	69	34936941	34936873	4.12e-28	59
sil_4999638	2	CM009794.1	115	97059	68	2	0	2	69	35161496	35161429	4.12e-28
sil_1104591	2	CM009794.1	128	100000	69	0	0	1	69	36628761	36628829	1.92e-26	63
SNP_3575270	2	CM009794.1	119	98507	67	1	0	3	69	36899213	36899147	1.92e-26	67
SNP_1056226	2	CM009794.1	128	100000	69	0	0	1	69	37113287	37113219	4.12e-28	68
SNP_100025137	2	CM009794.1	117	97101	69	2	0	1	69	38270756	38270824	5.33e-27
SNP_1094303	2	CM009794.1	126	100000	68	0	0	1	68	39711019	39710952	4.12e-28	72
SNP_1100699	2	CM009794.1	128	100000	69	0	0	1	69	40779695	40779763	4.12e-28	76
SNP_1225740	2	CM009794.1	122	100000	66	0	0	1	66	40783235	40783300	8.92e-25
sil_1070814	2	CM009794.1	122	98551	69	1	0	1	69	43077088	43077020	8.92e-25	77
sil_5006073	2	CM009794.1	117	97101	69	2	0	1	69	43077088	43077020	4.12e-28	78
SNP_2318465	2	CM009794.1	128	100000	69	0	0	1	69	43499113	43499045	1.92e-26	80
SNP_100017482	2	CM009794.1	117	97101	69	2	0	1	69	44121122	44121054	1.15e-23
sil_4996564	2	CM009794.1	122	98551	69	1	0	1	69	44241392	44241324	1.92e-26	82
sil_2257042	2	CM009794.1	124	100000	67	0	0	1	67	45585011	45585077	4.12e-28
sil_3575574	2	CM009794.1	117	97101	69	2	0	1	69	46147319	46147251	1.92e-26	84
sil_1071125	2	CM009794.1	121	98529	68	1	0	2	69	48305376	48305309	8.92e-25	90
sil_4009736	2	CM009794.1	122	98551	69	1	0	1	69	48386982	48386914	1.92e-26	91
SNP_2275170	2	CM009794.1	128	100000	69	0	0	1	69	48396313	48396245	1.48e-27	92
sil_2276492	2	CM009794.1	126	100000	68	0	0	1	68	48617594	48617527	4.12e-28	93
sil_4997462	2	CM009794.1	117	97101	69	2	0	1	69	50972357	50972425	6.90e-26
sil_2276212	2	CM009794.1	117	97101	69	2	0	1	69	51804817	51804885	4.12e-28	96
sil_3957450	2	CM009794.1	121	98529	68	1	0	1	68	52056952	52056885	1.92e-26	100
sil_1069938	2	CM009794.1	128	100000	69	0	0	1	69	52424085	52424017	4.12e-28	97
sil_5002092	2	CM009794.1	115	97101	69	1	1	1	69	52424085	52424018	4.12e-28	98
sil_3571868	2	CM009794.1	122	98551	69	1	0	1	69	54724377	54724309	1.92e-26	102
sil_4997123	2	CM009794.1	113	97015	67	2	0	1	67	54922340	54922274	4.12e-28
sil_984447	2	CM009794.1	128	100000	69	0	0	1	69	54922340	54922272	4.12e-28	104
sil_3570217	2	CM009794.1	122	98551	69	1	0	1	69	55196639	55196707	4.12e-28
sil_3571477	2	CM009794.1	122	98551	69	1	0	1	69	55196639	55196707	1.92e-26
sil_1068736	2	CM009794.1	128	100000	69	0	0	1	69	55436300	55436368	8.92e-25	105
sil_5003318	2	CM009794.1	117	97101	69	2	0	1	69	58516209	58516141	1.15e-23	94
sil_1232596	2	CM009794.1	122	98551	69	1	0	1	69	67844356	67844424	4.12e-28	107
sil_2328344	2	CM009794.1	128	100000	69	0	0	1	69	70215994	70215926	4.12e-28	108
SNP_1161563	2	CM009794.1	122	98551	69	1	0	1	69	70372645	70372577	8.92e-25	109
sil_5007860	2	CM009794.1	122	98551	69	1	0	1	69	72714572	72714640	4.12e-28	110
sil_1058403	2	CM009794.1	128	100000	69	0	0	1	69	73480410	73480342	4.12e-28	111
sil_4999177	2	CM009794.1	122	100000	66	0	0	1	66	74972153	74972088	1.92e-26
sil_1060777	2	CM009794.1	117	97101	69	2	0	1	69	81630826	81630758	4.12e-28
SNP_3950480	2	CM009794.1	128	100000	69	0	0	1	69	83951012	83951080	1.92e-26	115
sil_5010116	2	CM009794.1	111	97015	67	1	1	1	66	85898327	85898393	1.92e-26
SNP_100010290	2	CM009794.1	122	98551	69	1	0	1	69	85898330	85898262	1.92e-26	116
SNP_3570439	2	CM009794.1	117	97101	69	2	0	1	69	86777083	86777151	4.12e-28
sil_4994386	2	CM009794.1	126	100000	68	0	0	1	68	86949765	86949832	1.92e-26	117
SNP_998851	2	CM009794.1	128	100000	69	0	0	1	69	90720500	90720568	1.48e-27	119
sil_981399	2	CM009794.1	122	98551	69	1	0	1	69	90721124	90721192	1.92e-26	120
sil_5010233	2	CM009794.1	122	98551	69	1	0	1	69	91859812	91859744	4.12e-28
sil_1074973	2	CM009794.1	122	98551	69	1	0	1	69	94578690	94578622	3.21e-24	121
SNP_2289115	2	CM009794.1	128	100000	69	0	0	1	69	99773717	99773785	4.12e-28	124
sil_977603	2	CM009794.1	128	100000	69	0	0	1	69	102347936	102348004	1.48e-27	126
sil_1166053	2	CM009794.1	128	100000	69	0	0	1	69	104464133	104464201	1.92e-26	127
SNP_100032399	2	CM009794.1	117	97101	69	2	0	1	69	108259977	108259909	1.92e-26	128
sil_977751	2	CM009794.1	124	100000	67	0	0	1	67	115061022	115061088	1.92e-26
SNP_985906	2	CM009794.1	128	100000	69	0	0	1	69	117175310	117175378	4.12e-28	129
sil_5006490	2	CM009794.1	122	98551	69	1	0	1	69	117426589	117426657	1.92e-26	133
sil_2277039	2	CM009794.1	128	100000	69	0	0	1	69	123954053	123954121	4.12e-28	131
sil_1035330	2	CM009794.1	128	100000	69	0	0	1	69	132790331	132790263	8.92e-25	132
sil_1074803	2	CM009794.1	122	98551	69	1	0	1	69	135208304	135208372	1.92e-26	134
SNP_2276154	2	CM009794.1	128	100000	69	0	0	1	69	135373639	135373571	1.92e-26	137
sil_3572052	2	CM009794.1	122	98551	69	1	0	1	69	150594340	150594272	1.92e-26	138
sil_5004215	2	CM009794.1	115	97059	68	2	0	2	69	154766134	154766201	4.12e-28	140
sil_4996062	2	CM009794.1	124	100000	67	0	0	1	67	162754131	162754065	8.92e-25
SNP_100017357	2	CM009794.1	122	98551	69	1	0	1	69	164483255	164483187	6.90e-26	139
SNP_100002006	2	CM009794.1	128	100000	69	0	0	1	69	173113829	173113897	8.92e-25
sil_5006707	2	CM009794.1	117	97101	69	2	0	1	69	175783945	175783877	4.12e-28
SNP_1120319	2	CM009794.1	128	100000	69	0	0	1	69	181641344	181641276	2.48e-25	142
SNP_1051309	2	CM009794.1	128	100000	69	0	0	1	69	208299883	208299951	4.12e-28	146
sil_5008138	2	CM009794.1	122	98551	69	1	0	1	69	216208937	216208869	1.92e-26
sil_5004682	2	CM009794.1	122	98551	69	1	0	1	69	226012271	226012203	5.33e-27	144
sil_4996429	2	CM009794.1	113	97059	68	1	1	2	69	227657530	227657596	4.12e-28	152
sil_1222924	2	CM009794.1	122	98551	69	1	0	1	69	228626220	228626288	4.12e-28	153
sil_3571831	2	CM009794.1	122	98551	69	1	0	1	69	256296029	256296097	4.12e-28
sil_3572318	2	CM009794.1	115	97059	68	2	0	1	68	301492153	301492086	4.15e-23	156
sil_5000342	2	CM009794.1	117	97101	69	2	0	1	69	317703959	317703891	4.12e-28
sil_2305243	2	CM009794.1	128	100000	69	0	0	1	69	323723880	323723948	1.92e-26	150
sil_5006113	2	CM009794.1	128	100000	69	0	0	1	69	341095054	341095122	1.92e-26
sil_4998886	2	CM009794.1	115	97101	69	1	1	1	68	353061715	353061783	1.92e-26
sil_5006091	2	CM009794.1	117	97101	69	2	0	1	69	360919484	360919552	6.90e-26
sil_1247991	2	CM009794.1	124	100000	67	0	0	1	67	368147797	368147863	4.12e-28	154
sil_4998043	2	CM009794.1	117	97101	69	2	0	1	69	376498501	376498433	4.12e-28	159
sil_1230947	2	CM009794.1	122	98551	69	1	0	1	69	380853235	380853167	4.12e-28	160
sil_5010431	2	CM009794.1	121	98529	68	1	0	2	69	391461957	391462024	1.92e-26
sil_1236852	2	CM009794.1	128	100000	69	0	0	1	69	401023608	401023676	1.92e-26	162
sil_1061945	2	CM009794.1	128	100000	69	0	0	1	69	403531461	403531393	4.12e-28
sil_5004964	2	CM009794.1	117	97101	69	2	0	1	69	405488516	405488584	4.12e-28
sil_1380482	2	CM009794.1	128	100000	69	0	0	1	69	415168496	415168428	4.12e-28	161
SNP_2254482	2	CM009794.1	128	100000	69	0	0	1	69	431991505	431991437	4.12e-28	165
sil_1136456	2	CM009794.1	128	100000	69	0	0	1	69	436696664	436696732	4.12e-28	164
sil_4995895	2	CM009794.1	115	97059	68	2	0	1	68	443277349	443277416	1.92e-26	163
SNP_100029307	2	CM009794.1	117	98485	66	1	0	1	66	453922708	453922773	5.33e-27
SNP_1087708	2	CM009794.1	128	100000	69	0	0	1	69	462583081	462583013	4.12e-28
SNP_1089706	2	CM009794.1	128	100000	69	0	0	1	69	471492238	471492170	1.92e-26	166
SNP_3949514	2	CM009794.1	128	100000	69	0	0	1	69	473233235	473233303	1.92e-26	167
sil_1044076	2	CM009794.1	117	97101	69	2	0	1	69	494074587	494074519	4.12e-28	168
sil_3572594	2	CM009794.1	122	98551	69	1	0	1	69	530992770	530992838	4.12e-28	174
sil_5006335	2	CM009794.1	117	97101	69	2	0	1	69	536820809	536820877	4.12e-28
sil_1108344	2	CM009794.1	128	100000	69	0	0	1	69	543653803	543653871	4.12e-28	175
sil_5007308	2	CM009794.1	117	97101	69	2	0	1	69	553689421	553689353	6.90e-26
sil_5003251	2	CM009794.1	119	98507	67	1	0	1	67	554095710	554095776	1.92e-26
SNP_989279	2	CM009794.1	128	100000	69	0	0	1	69	559451575	559451507	1.92e-26	172
sil_1058113	2	CM009794.1	117	98485	66	1	0	1	66	562116885	562116950	4.12e-28	170
sil_3570730	2	CM009794.1	117	97101	69	2	0	1	69	562116885	562116953	8.92e-25	171
sil_1118205	2	CM009794.1	128	100000	69	0	0	1	69	563708084	563708016	8.92e-25	177
sil_4995841	2	CM009794.1	121	98551	69	0	1	1	69	563708084	563708017	4.12e-28	178
sil_4998182	2	CM009794.1	122	98551	69	1	0	1	69	565674451	565674519	6.90e-26	179
sil_5005287	2	CM009794.1	117	97101	69	2	0	1	69	571330136	571330204	4.12e-28
sil_1216482	2	CM009794.1	128	100000	69	0	0	1	69	574234696	574234628	4.12e-28	183
sil_5005077	2	CM009794.1	115	97101	69	1	1	1	69	578512937	578512870	4.12e-28
sil_3034284	2	CM009794.1	128	100000	69	0	0	1	69	578888074	578888142	4.12e-28
sil_1090015	2	CM009794.1	128	100000	69	0	0	1	69	587280718	587280650	1.92e-26	188
sil_5002059	2	CM009794.1	128	100000	69	0	0	1	69	587312987	587312919	4.12e-28	189
sil_2275686	2	CM009794.1	122	98551	69	1	0	1	69	590244266	590244198	4.12e-28	193
SNP_100020205	2	CM009794.1	128	100000	69	0	0	1	69	591542795	591542863	1.92e-26	194
sil_981817	2	CM009794.1	128	100000	69	0	0	1	69	591573225	591573293	4.12e-28
sil_5007587	2	CM009794.1	128	100000	69	0	0	1	69	591573228	591573160	1.92e-26
sil_4994556	2	CM009794.1	117	97101	69	2	0	1	69	593001861	593001793	4.12e-28	195
sil_1099566	2	CM009794.1	119	98507	67	1	0	1	67	593353183	593353249	8.92e-25
SNP_1050727	2	CM009794.1	128	100000	69	0	0	1	69	593743295	593743227	8.92e-25	197
sil_3573146	2	CM009794.1	115	97059	68	2	0	1	68	594465959	594466026	4.12e-28	198
sil_1020854	2	CM009794.1	128	100000	69	0	0	1	69	597220361	597220293	4.12e-28	200
sil_4999244	2	CM009794.1	115	97059	68	2	0	2	69	597993825	597993758	1.92e-26
sil_994526	2	CM009794.1	128	100000	69	0	0	1	69	599687146	599687078	4.12e-28	201
sil_5008036	2	CM009794.1	122	98551	69	1	0	1	69	602402529	602402597	4.12e-28
sil_1112261	2	CM009794.1	122	98551	69	1	0	1	69	605088289	605088221	4.12e-28	202
sil_3572193	2	CM009794.1	117	97101	69	2	0	1	69	605637488	605637420	1.92e-26	203
sil_5005582	2	CM009794.1	117	97101	69	2	0	1	69	606488491	606488423	1.92e-26	204
SNP_2297047	2	CM009794.1	122	100000	66	0	0	1	66	606519543	606519478	1.92e-26
SNP_1089536	2	CM009794.1	128	100000	69	0	0	1	69	606634747	606634815	4.12e-28	205
SNP_100015675	2	CM009794.1	117	97101	69	2	0	1	69	607114461	607114393	1.92e-26
sil_5009601	2	CM009794.1	128	100000	69	0	0	1	69	612948010	612948078	1.92e-26	206
SNP_3574781	2	CM009794.1	122	98551	69	1	0	1	69	614427148	614427216	4.12e-28	207
sil_5003444	2	CM009794.1	115	97101	69	1	1	1	69	622620735	622620802	1.92e-26
sil_4997520	2	CM009794.1	122	98551	69	1	0	1	69	646534569	646534637	8.92e-25
sil_2263542	2	CM009794.1	121	98551	69	0	1	1	69	649063018	649062951	4.12e-28	211
sil_3575446	2	CM009794.1	117	97101	69	2	0	1	69	649329548	649329480	4.12e-28
SNP_1077755	2	CM009794.1	128	100000	69	0	0	1	69	649499477	649499545	1.92e-26	212
SNP_1012287	2	CM009794.1	128	100000	69	0	0	1	69	658924216	658924148	1.92e-26	214
SNP_1216892	2	CM009794.1	128	100000	69	0	0	1	69	661695291	661695223	1.92e-26	217
sil_3573554	2	CM009794.1	128	100000	69	0	0	1	69	661839983	661839915	4.12e-28	215
sil_1055064	2	CM009794.1	113	97015	67	2	0	1	67	664684697	664684631	4.12e-28	221
SNP_2276201	2	CM009794.1	128	100000	69	0	0	1	69	666243766	666243698	4.12e-28	222
SNP_3953991	2	CM009794.1	117	97101	69	2	0	1	69	667998094	667998026	4.12e-28	224
sil_1272881	2	CM009794.1	128	100000	69	0	0	1	69	668055600	668055668	8.92e-25	223
SNP_1216386	2	CM009794.1	128	100000	69	0	0	1	69	668936221	668936153	4.12e-28	225
SNP_100018101	2	CM009794.1	128	100000	69	0	0	1	69	669370568	669370636	4.12e-28	226
sil_2251565	2	CM009794.1	122	98551	69	1	0	1	69	669743986	669744054	8.92e-25	227
SNP_996421	2	CM009794.1	128	100000	69	0	0	1	69	669756024	669756092	8.92e-25	228
sil_4998173	2	CM009794.1	122	98551	69	1	0	1	69	672336643	672336575	4.12e-28
sil_4998924	2	CM009794.1	128	100000	69	0	0	1	69	672339390	672339322	1.92e-26
sil_5002612	2	CM009794.1	115	97101	69	1	1	1	69	673469424	673469491	4.12e-28	232
sil_4911036	2	CM009794.1	128	100000	69	0	0	1	69	678398921	678398989	1.92e-26	235
sil_1208214	2	CM009794.1	128	100000	69	0	0	1	69	680457248	680457316	1.92e-26	236
sil_5004180	2	CM009794.1	128	100000	69	0	0	1	69	682193442	682193374	1.92e-26
SNP_1861237	2	CM009794.1	121	98529	68	1	0	2	69	682554066	682553999	4.12e-28	237
sil_1047205	2	CM009794.1	126	100000	68	0	0	1	68	682577072	682577139	4.12e-28	238
sil_3571536	2	CM009794.1	117	97101	69	2	0	1	69	682577072	682577140	4.12e-28	239
sil_3573815	2	CM009794.1	119	98507	67	1	0	1	67	682577072	682577138	3.21e-24
sil_3570659	2	CM009794.1	119	98507	67	1	0	1	67	682621341	682621407	6.90e-26
sil_4995932	2	CM009794.1	117	97101	69	2	0	1	69	685983679	685983747	1.92e-26
sil_1055288	2	CM009794.1	128	100000	69	0	0	1	69	687563355	687563423	4.12e-28	241
sil_2357011	2	CM009794.1	128	100000	69	0	0	1	69	689698220	689698288	1.92e-26	246
sil_2269476	2	CM009794.1	121	98529	68	1	0	1	68	691257812	691257745	4.12e-28	247
sil_5007738	2	CM009794.1	122	98551	69	1	0	1	69	692871864	692871932	1.92e-26	248
sil_4999254	2	CM009794.1	117	97101	69	2	0	1	69	695656833	695656765	1.92e-26
sil_3959176	2	CM009794.1	128	100000	69	0	0	1	69	696299859	696299791	5.33e-27	252
sil_1142997	2	CM009794.1	122	98551	69	1	0	1	69	696668153	696668221	4.12e-28	256
sil_1003830	2	CM009794.1	117	97101	69	2	0	1	69	700977597	700977665	8.92e-25	185
sil_1087662	2	CM009794.1	128	100000	69	0	0	1	69	701367432	701367364	6.90e-26	257
sil_1090516	2	CM009794.1	126	100000	68	0	0	1	68	702947901	702947834	8.92e-25	258
SNP_100005830	2	CM009794.1	122	98551	69	1	0	1	69	706240808	706240740	1.15e-23	263
sil_1114336	2	CM009794.1	128	100000	69	0	0	1	69	709483633	709483701	8.92e-25	267
sil_1210028	2	CM009794.1	128	100000	69	0	0	1	69	709490605	709490673	5.33e-27	268
sil_4997204	2	CM009794.1	117	98485	66	1	0	1	66	710396648	710396583	4.12e-28
sil_1136600	2	CM009794.1	122	98551	69	1	0	1	69	711161854	711161922	4.12e-28	272
sil_1091052	2	CM009794.1	122	98551	69	1	0	1	69	711161857	711161789	1.92e-26	273
sil_2323186	2	CM009794.1	122	98551	69	1	0	1	69	711612674	711612742	1.92e-26	271
SNP_977718	2	CM009794.1	128	100000	69	0	0	1	69	711693228	711693296	4.12e-28	274
sil_1247087	2	CM009794.1	122	98551	69	1	0	1	69	711694267	711694199	1.92e-26	275
sil_4999519	2	CM009794.1	117	97101	69	2	0	1	69	711694267	711694199	4.12e-28	276
sil_5009738	2	CM009794.1	117	97101	69	2	0	1	69	711694267	711694199	1.92e-26	277
sil_4998418	2	CM009794.1	117	98485	66	1	0	1	66	711866651	711866586	1.92e-26
sil_4998818	2	CM009794.1	115	97059	68	2	0	1	68	711866651	711866584	6.90e-26
sil_5003715	2	CM009794.1	119	98507	67	1	0	1	67	711866651	711866585	4.12e-28
SNP_1088061	2	CM009794.1	128	100000	69	0	0	1	69	711922981	711922913	4.12e-28	280
sil_1098195	2	CM009794.1	122	98551	69	1	0	1	69	711932403	711932335	1.92e-26	281
sil_3572127	2	CM009794.1	115	97101	69	1	1	1	69	711932643	711932710	4.12e-28	282
sil_1105182	2	CM009794.1	122	98551	69	1	0	1	69	711969816	711969748	8.92e-25
sil_5008555	2	CM009794.1	121	98529	68	1	0	1	68	712722692	712722625	1.92e-26	284
sil_5007548	2	CM009794.1	115	97101	69	1	1	1	69	713186841	713186908	2.48e-25
sil_1089467	2	CM009794.1	128	100000	69	0	0	1	69	713625459	713625527	1.15e-23
sil_1208934	2	CM009794.1	128	100000	69	0	0	1	69	714377335	714377403	1.92e-26	260
sil_5006281	2	CM009794.1	115	97101	69	1	1	1	69	714377335	714377402	1.92e-26	261
sil_5002792	2	CM009794.1	122	98551	69	1	0	1	69	715123633	715123701	4.12e-28
sil_1163089	2	CM009794.1	122	98551	69	1	0	1	69	716596294	716596226	4.12e-28	285
sil_3573040	2	CM009794.1	122	98551	69	1	0	1	69	717775199	717775131	4.12e-28
sil_3573562	2	CM009794.1	122	98551	69	1	0	1	69	717775199	717775131	1.92e-26
sil_984943	2	CM009794.1	124	100000	67	0	0	1	67	719718296	719718362	5.33e-27	288
sil_1088087	2	CM009794.1	128	100000	69	0	0	1	69	720844486	720844418	4.12e-28
SNP_1088087	2	CM009794.1	128	100000	69	0	0	1	69	720844486	720844418	8.92e-25
sil_3573643	2	CM009794.1	122	98551	69	1	0	1	69	721050636	721050704	8.92e-25
SNP_3574751	2	CM009794.1	115	97059	68	2	0	1	68	722128760	722128693	4.12e-28
SNP_978081	2	CM009794.1	128	100000	69	0	0	1	69	722422968	722422900	8.92e-25	289
sil_2263855	2	CM009794.1	128	100000	69	0	0	1	69	722972170	722972102	8.92e-25	291
sil_2273793	2	CM009794.1	122	100000	66	0	0	1	66	722972219	722972284	3.21e-24
sil_1091680	2	CM009794.1	128	100000	69	0	0	1	69	724853882	724853814	1.92e-26	292
sil_5002430	2	CM009794.1	122	98551	69	1	0	1	69	726217450	726217382	1.92e-26
SNP_100005027	2	CM009794.1	119	98507	67	1	0	3	69	727950989	727951055	4.12e-28
sil_4999685	2	CM009794.1	117	97101	69	2	0	1	69	728157027	728156959	6.90e-26	296
sil_1207505	2	CM009794.1	117	97101	69	2	0	1	69	728169356	728169424	4.12e-28	297
sil_4009846	2	CM009794.1	124	100000	67	0	0	1	67	728549091	728549025	8.92e-25
sil_3573072	2	CM009794.1	111	97015	67	1	1	3	69	728610813	728610878	1.92e-26
sil_1120396	2	CM009794.1	128	100000	69	0	0	1	69	730919615	730919683	1.92e-26	307
SNP_4544261	2	CM009794.1	117	97101	69	2	0	1	69	731123022	731123090	2.48e-25	308
sil_5010277	2	CM009794.1	113	97015	67	2	0	3	69	732475234	732475300	4.12e-28
sil_2253931	2	CM009794.1	122	98551	69	1	0	1	69	732657632	732657700	1.92e-26
sil_4999668	2	CM009794.1	121	98551	69	0	1	1	69	732657632	732657699	1.92e-26
sil_977695	2	CM009794.1	122	98551	69	1	0	1	69	732657635	732657567	1.92e-26	385
sil_2245060	2	CM009794.1	122	98551	69	1	0	1	69	733417400	733417332	1.92e-26	374
sil_5007131	2	CM009794.1	128	100000	69	0	0	1	69	733498858	733498926	1.92e-26	373
sil_1024346	2	CM009794.1	122	98551	69	1	0	1	69	733501893	733501961	4.12e-28	372
sil_1022729	2	CM009794.1	122	98551	69	1	0	1	69	733601616	733601548	1.92e-26	375
sil_4411024	2	CM009794.1	115	97059	68	2	0	1	68	734074326	734074393	4.12e-28	376
sil_4999508	2	CM009794.1	122	98551	69	1	0	1	69	734661499	734661567	1.92e-26
sil_3960583	2	CM009794.1	122	98551	69	1	0	1	69	734950163	734950231	4.12e-28	321
sil_1167765	2	CM009794.1	122	98551	69	1	0	1	69	735989380	735989448	8.92e-25
sil_1089389	2	CM009794.1	128	100000	69	0	0	1	69	735999235	735999167	4.12e-28	317
SNP_3022671	2	CM009794.1	128	100000	69	0	0	1	69	735999690	735999758	4.12e-28	316
SNP_1071003	2	CM009794.1	128	100000	69	0	0	1	69	735999693	735999625	4.12e-28	315
sil_5005977	2	CM009794.1	122	98551	69	1	0	1	69	736001705	736001773	1.92e-26	314
SNP_1223066	2	CM009794.1	117	97101	69	2	0	1	69	736608378	736608310	1.92e-26	310
sil_1065604	2	CM009794.1	128	100000	69	0	0	1	69	737388585	737388517	6.90e-26
sil_1041226	2	CM009794.1	128	100000	69	0	0	1	69	737658207	737658139	1.48e-27	351
sil_3572115	2	CM009794.1	121	98551	69	0	1	1	69	737830127	737830060	1.92e-26	350
SNP_3570180	2	CM009794.1	128	100000	69	0	0	1	69	738014760	738014828	4.12e-28	347
SNP_1150218	2	CM009794.1	128	100000	69	0	0	1	69	738353994	738354062	6.90e-26	345
SNP_1100850	2	CM009794.1	128	100000	69	0	0	1	69	738359267	738359335	4.12e-28	344
sil_1064065	2	CM009794.1	128	100000	69	0	0	1	69	738517754	738517822	4.15e-23	343
sil_1032108	2	CM009794.1	122	98551	69	1	0	1	69	739308840	739308908	8.92e-25	341
sil_3532864	2	CM009794.1	122	98551	69	1	0	1	69	739551344	739551276	8.92e-25
sil_1049049	2	CM009794.1	128	100000	69	0	0	1	69	739564515	739564447	1.92e-26
sil_3573183	2	CM009794.1	128	100000	69	0	0	1	69	739628226	739628158	8.92e-25
sil_3575741	2	CM009794.1	128	100000	69	0	0	1	69	739628627	739628695	6.90e-26
sil_1095302	2	CM009794.1	128	100000	69	0	0	1	69	740439550	740439618	3.21e-24	340
sil_1669262	2	CM009794.1	124	100000	67	0	0	1	67	740637528	740637594	6.90e-26
SNP_2289258	2	CM009794.1	122	98551	69	1	0	1	69	740688610	740688542	1.92e-26
sil_4733743	2	CM009794.1	122	98551	69	1	0	1	69	740897746	740897678	8.92e-25	187
sil_1327154	2	CM009794.1	122	98551	69	1	0	1	69	740960407	740960475	8.92e-25
SNP_1695453	2	CM009794.1	117	97101	69	2	0	1	69	741352343	741352275	4.12e-28	333
sil_1066049	2	CM009794.1	117	97101	69	2	0	1	69	741511053	741511121	5.33e-27	334
SNP_2293787	2	CM009794.1	128	100000	69	0	0	1	69	741518173	741518241	2.48e-25	336
SNP_4733712	2	CM009794.1	122	98551	69	1	0	1	69	741664122	741664190	1.92e-26
sil_977707	2	CM009794.1	128	100000	69	0	0	1	69	741669916	741669848	2.48e-25	337
sil_985217	2	CM009794.1	128	100000	69	0	0	1	69	742421443	742421511	1.92e-26	332
sil_1056803	2	CM009794.1	122	98551	69	1	0	1	69	742778804	742778872	8.92e-25	331
sil_1049945	2	CM009794.1	128	100000	69	0	0	1	69	743239032	743238964	1.92e-26
sil_1062662	2	CM009794.1	128	100000	69	0	0	1	69	743249977	743250045	5.33e-27
SNP_1694900	2	CM009794.1	128	100000	69	0	0	1	69	743892125	743892193	8.92e-25
sil_1024178	2	CM009794.1	122	98551	69	1	0	1	69	745420573	745420641	1.48e-27	356
sil_1128058	2	CM009794.1	122	98551	69	1	0	1	69	746903590	746903658	4.12e-28	352
sil_2251099	2	CM009794.1	122	98551	69	1	0	1	69	747789548	747789616	4.12e-28
sil_3953107	2	CM009794.1	121	98529	68	1	0	1	68	747789548	747789615	8.92e-25
SNP_1052066	2	CM009794.1	122	98551	69	1	0	1	69	748414198	748414130	1.92e-26	381
sil_3570347	2	CM009794.1	117	98485	66	1	0	2	67	749685484	749685549	1.92e-26
sil_1239237	2	CM009794.1	122	98551	69	1	0	1	69	749971557	749971625	8.92e-25	371
SNP_1695742	2	CM009794.1	128	100000	69	0	0	1	69	750132224	750132156	4.12e-28
sil_1302686	2	CM009794.1	128	100000	69	0	0	1	69	750442036	750441968	1.92e-26
sil_1247299	2	CM009794.1	122	98551	69	1	0	1	69	750799695	750799763	4.12e-28
sil_3533784	2	CM009794.1	121	98529	68	1	0	1	68	751700105	751700038	4.12e-28
sil_3574942	2	CM009794.1	121	98529	68	1	0	1	68	751700105	751700038	8.92e-25
sil_1228010	2	CM009794.1	128	100000	69	0	0	1	69	752149869	752149801	4.12e-28
sil_4997218	2	CM009794.1	122	98551	69	1	0	1	69	752327713	752327781	1.92e-26
sil_3020771	2	CM009794.1	122	98551	69	1	0	1	69	752800027	752800095	8.92e-25
sil_1110336	2	CM009794.1	119	98507	67	1	0	1	67	753601068	753601134	1.92e-26
sil_5009056	3	CM009795.1	111	97015	67	1	1	4	69	746844861	746844927	5.33e-27
sil_5008750	3	CM009795.1	122	98551	69	1	0	1	69	746844856	746844924	4.12e-28
sil_5002393	3	CM009795.1	117	97101	69	2	0	1	69	746801213	746801145	5.33e-27
SNP_1017788	3	CM009795.1	128	100000	69	0	0	1	69	746606388	746606456	1.48e-27	1
sil_1129546	3	CM009795.1	122	98551	69	1	0	1	69	745922896	745922828	1.15e-23
sil_1060714	3	CM009795.1	128	100000	69	0	0	1	69	742790694	742790762	8.92e-25
sil_1215749	3	CM009795.1	128	100000	69	0	0	1	69	742790625	742790557	2.48e-25
sil_1067085	3	CM009795.1	122	98551	69	1	0	1	69	742764448	742764380	1.92e-26	4
sil_3572618	3	CM009795.1	113	97015	67	2	0	1	67	742463790	742463856	1.15e-23
sil_1259138	3	CM009795.1	128	100000	69	0	0	1	69	742190789	742190721	1.92e-26
sil_2281175	3	CM009795.1	122	98551	69	1	0	1	69	742190786	742190854	8.92e-25
SNP_1268287	3	CM009795.1	128	100000	69	0	0	1	69	742185182	742185114	1.92e-26
SNP_1075480	3	CM009795.1	128	100000	69	0	0	1	69	741805030	741804962	1.92e-26	7
sil_3573738	3	CM009795.1	122	98551	69	1	0	1	69	741186011	741185943	1.92e-26	9
SNP_1218175	3	CM009795.1	128	100000	69	0	0	1	69	739864074	739864006	1.15e-23	12
SNP_100011386	3	CM009795.1	126	100000	68	0	0	2	69	738858127	738858194	8.92e-25	13
sil_3570768	3	CM009795.1	124	100000	67	0	0	1	67	738580075	738580009	8.92e-25
sil_1387129	3	CM009795.1	122	98551	69	1	0	1	69	737787189	737787257	1.92e-26	16
sil_3570594	3	CM009795.1	128	100000	69	0	0	1	69	737711176	737711244	8.92e-25
sil_3575643	3	CM009795.1	128	100000	69	0	0	1	69	737183504	737183436	4.12e-28	19
sil_5005599	3	CM009795.1	115	97059	68	2	0	2	69	736727950	736727883	1.92e-26
sil_4999315	3	CM009795.1	117	98485	66	1	0	4	69	736712172	736712237	8.92e-25
sil_1282324	3	CM009795.1	128	100000	69	0	0	1	69	736522274	736522206	1.92e-26
sil_5003309	3	CM009795.1	117	97101	69	2	0	1	69	734940929	734940861	5.33e-27	22
sil_4998144	3	CM009795.1	128	100000	69	0	0	1	69	734824121	734824053	1.92e-26
sil_1267930	3	CM009795.1	113	97015	67	2	0	1	67	734512400	734512466	3.21e-24
sil_3572647	3	CM009795.1	117	97101	69	2	0	1	69	733970923	733970855	2.48e-25
sil_5007949	3	CM009795.1	121	98529	68	1	0	2	69	733657142	733657075	4.12e-28
sil_5007288	3	CM009795.1	115	97059	68	2	0	1	68	733521615	733521682	4.12e-28	26
sil_4999068	3	CM009795.1	122	98551	69	1	0	1	69	733176070	733176138	4.12e-28	25
sil_1204942	3	CM009795.1	122	98551	69	1	0	1	69	732878154	732878222	3.21e-24	28
SNP_100040961	3	CM009795.1	117	97101	69	2	0	1	69	732877784	732877716	1.92e-26	29
sil_4994564	3	CM009795.1	117	97101	69	2	0	1	69	732619636	732619568	1.15e-23
sil_3573626	3	CM009795.1	113	97015	67	2	0	2	68	732433200	732433134	4.15e-23
sil_1018669	3	CM009795.1	126	100000	68	0	0	1	68	731958968	731959035	8.92e-25	30
SNP_1092779	3	CM009795.1	128	100000	69	0	0	1	69	730423580	730423512	2.48e-25	34
sil_4997458	3	CM009795.1	128	100000	69	0	0	1	69	729940130	729940062	1.92e-26	33
sil_4998245	3	CM009795.1	128	100000	69	0	0	1	69	729831494	729831426	8.92e-25
sil_4998727	3	CM009795.1	122	98551	69	1	0	1	69	728446026	728445958	8.92e-25
sil_1119574	3	CM009795.1	128	100000	69	0	0	1	69	728440054	728440122	8.92e-25
sil_1094416	3	CM009795.1	122	98551	69	1	0	1	69	724980410	724980478	8.92e-25	35
sil_1722172	3	CM009795.1	122	98551	69	1	0	1	69	724427941	724427873	1.15e-23
sil_4994450	3	CM009795.1	122	98551	69	1	0	1	69	722552352	722552420	2.48e-25
sil_1119060	3	CM009795.1	122	98551	69	1	0	1	69	721981737	721981805	8.92e-25	93
sil_5010516	3	CM009795.1	122	98551	69	1	0	1	69	721888208	721888276	1.92e-26	43
sil_993112	3	CM009795.1	128	100000	69	0	0	1	69	720065689	720065757	8.92e-25	46
SNP_1861764	3	CM009795.1	117	97101	69	2	0	1	69	718658663	718658731	1.92e-26
sil_986175	3	CM009795.1	126	100000	68	0	0	1	68	717792847	717792780	8.92e-25	47
sil_1074096	3	CM009795.1	128	100000	69	0	0	1	69	715454858	715454926	1.92e-26	52
sil_2277331	3	CM009795.1	128	100000	69	0	0	1	69	714869510	714869578	4.12e-28
SNP_2276624	3	CM009795.1	128	100000	69	0	0	1	69	714818354	714818286	1.92e-26	51
sil_4998566	3	CM009795.1	117	97101	69	2	0	1	69	714818351	714818419	8.92e-25	50
sil_989352	3	CM009795.1	122	98551	69	1	0	1	69	714671994	714672062	8.92e-25	49
sil_4998247	3	CM009795.1	117	97101	69	2	0	1	69	714497658	714497590	8.92e-25
sil_1080050	3	CM009795.1	128	100000	69	0	0	1	69	714442817	714442885	3.21e-24	54
sil_4994658	3	CM009795.1	117	97101	69	2	0	1	69	712649200	712649132	8.92e-25	56
SNP_1122511	3	CM009795.1	122	98551	69	1	0	1	69	712452886	712452818	3.21e-24	57
sil_5010572	3	CM009795.1	117	97101	69	2	0	1	69	711627282	711627350	6.90e-26
sil_5009470	3	CM009795.1	113	97015	67	2	0	1	67	711006313	711006247	4.12e-28
sil_1267664	3	CM009795.1	119	98507	67	1	0	1	67	711006313	711006247	8.92e-25
sil_1075069	3	CM009795.1	128	100000	69	0	0	1	69	709577479	709577411	1.92e-26
sil_4999476	3	CM009795.1	128	100000	69	0	0	1	69	708484583	708484515	4.12e-28
sil_5004553	3	CM009795.1	128	100000	69	0	0	1	69	708417514	708417582	4.12e-28
SNP_3947649	3	CM009795.1	128	100000	69	0	0	1	69	705665961	705665893	8.92e-25	62
sil_992301	3	CM009795.1	122	98551	69	1	0	1	69	704310196	704310128	1.92e-26
sil_1177721	3	CM009795.1	128	100000	69	0	0	1	69	703458525	703458593	8.92e-25	65
sil_1861346	3	CM009795.1	122	98551	69	1	0	1	69	701529132	701529200	1.15e-23
SNP_982276	3	CM009795.1	128	100000	69	0	0	1	69	699944096	699944028	1.92e-26	67
sil_982276	3	CM009795.1	128	100000	69	0	0	1	69	699944096	699944028	1.92e-26	66
sil_2321508	3	CM009795.1	124	100000	67	0	0	1	67	699826097	699826031	8.92e-25
sil_5010457	3	CM009795.1	117	97101	69	2	0	1	69	699776933	699776865	4.12e-28	68
sil_1861319	3	CM009795.1	122	98551	69	1	0	1	69	697654726	697654658	8.92e-25
sil_2276559	3	CM009795.1	128	100000	69	0	0	1	69	696748500	696748568	1.92e-26	76
sil_4994390	3	CM009795.1	122	100000	66	0	0	1	66	695890972	695891037	8.92e-25
sil_5001700	3	CM009795.1	119	98507	67	1	0	1	67	695265353	695265287	6.90e-26
sil_1228792	3	CM009795.1	128	100000	69	0	0	1	69	689865980	689866048	8.92e-25	85
sil_4999728	3	CM009795.1	119	98507	67	1	0	1	67	689443240	689443174	1.92e-26
SNP_1065104	3	CM009795.1	128	100000	69	0	0	1	69	689002275	689002207	1.15e-23	89
SNP_3572867	3	CM009795.1	122	98551	69	1	0	1	69	687178092	687178160	4.12e-28
SNP_1695692	3	CM009795.1	122	98551	69	1	0	1	69	686922697	686922629	4.15e-23
sil_1664161	3	CM009795.1	117	97101	69	2	0	1	69	685865717	685865785	3.21e-24
sil_985642	3	CM009795.1	122	98551	69	1	0	1	69	685859673	685859605	6.90e-26	91
sil_3573266	3	CM009795.1	122	98551	69	1	0	1	69	685208428	685208360	2.48e-25
sil_1261413	3	CM009795.1	128	100000	69	0	0	1	69	683075305	683075237	6.90e-26
sil_5006817	3	CM009795.1	115	97059	68	2	0	1	68	680716946	680716879	3.21e-24
SNP_1860537	3	CM009795.1	122	98551	69	1	0	1	69	679637755	679637687	6.90e-26
sil_2282700	3	CM009795.1	117	97101	69	2	0	1	69	679218839	679218771	1.92e-26
sil_1231255	3	CM009795.1	128	100000	69	0	0	1	69	677612591	677612523	1.15e-23	104
sil_982739	3	CM009795.1	122	98551	69	1	0	1	69	673801654	673801586	1.92e-26	100
SNP_1028212	3	CM009795.1	128	100000	69	0	0	1	69	673553174	673553106	1.92e-26	101
SNP_2330716	3	CM009795.1	128	100000	69	0	0	1	69	671935541	671935609	8.92e-25	103
SNP_1050473	3	CM009795.1	122	100000	66	0	0	1	66	669594430	669594365	5.33e-27
sil_997335	3	CM009795.1	128	100000	69	0	0	1	69	663851371	663851439	8.92e-25	108
SNP_3022194	3	CM009795.1	128	100000	69	0	0	1	69	663812502	663812570	8.92e-25	109
SNP_1079639	3	CM009795.1	128	100000	69	0	0	1	69	661956946	661956878	1.92e-26	111
sil_5009288	3	CM009795.1	124	100000	67	0	0	3	69	659516486	659516420	2.48e-25
sil_1073964	3	CM009795.1	122	98551	69	1	0	1	69	651600357	651600289	4.12e-28	107
sil_1202048	3	CM009795.1	128	100000	69	0	0	1	69	651498401	651498333	1.92e-26
sil_1219627	3	CM009795.1	122	98551	69	1	0	1	69	647645691	647645759	4.12e-28	86
SNP_100002139	3	CM009795.1	122	98551	69	1	0	1	69	647093910	647093978	8.92e-25
SNP_1695356	3	CM009795.1	128	100000	69	0	0	1	69	640153251	640153319	1.92e-26	115
SNP_2289441	3	CM009795.1	128	100000	69	0	0	1	69	639060043	639059975	1.92e-26
SNP_2293071	3	CM009795.1	128	100000	69	0	0	1	69	638932532	638932464	8.92e-25	112
sil_994545	3	CM009795.1	122	98551	69	1	0	1	69	638135947	638136015	8.92e-25	114
sil_3064362	3	CM009795.1	128	100000	69	0	0	1	69	635622864	635622932	4.12e-28	121
SNP_2255197	3	CM009795.1	128	100000	69	0	0	1	69	632061275	632061207	4.12e-28	122
SNP_1106097	3	CM009795.1	128	100000	69	0	0	1	69	631720139	631720071	4.12e-28	124
SNP_1205947	3	CM009795.1	128	100000	69	0	0	1	69	628184090	628184022	8.92e-25	126
sil_1018396	3	CM009795.1	128	100000	69	0	0	1	69	626802561	626802629	1.92e-26	127
sil_1029052	3	CM009795.1	128	100000	69	0	0	1	69	626370045	626370113	6.90e-26	128
sil_1103761	3	CM009795.1	128	100000	69	0	0	1	69	626363780	626363712	1.92e-26	129
SNP_2242563	3	CM009795.1	128	100000	69	0	0	1	69	624516780	624516712	3.21e-24	136
sil_4998018	3	CM009795.1	122	98551	69	1	0	1	69	623722518	623722450	1.92e-26
sil_4998683	3	CM009795.1	122	98551	69	1	0	1	69	617464887	617464955	4.12e-28	132
SNP_1082841	3	CM009795.1	128	100000	69	0	0	1	69	616848300	616848232	1.92e-26	134
sil_2327075	3	CM009795.1	128	100000	69	0	0	1	69	616698496	616698428	4.12e-28	135
SNP_1088634	3	CM009795.1	128	100000	69	0	0	1	69	611383716	611383784	4.12e-28	138
SNP_1064085	3	CM009795.1	128	100000	69	0	0	1	69	608174276	608174208	1.92e-26	140
sil_5007212	3	CM009795.1	115	97101	69	1	1	1	69	607511153	607511086	1.92e-26	141
sil_1150049	3	CM009795.1	128	100000	69	0	0	1	69	605972806	605972738	4.12e-28	142
SNP_1247304	3	CM009795.1	128	100000	69	0	0	1	69	602959361	602959293	4.12e-28	143
SNP_1089879	3	CM009795.1	128	100000	69	0	0	1	69	602951684	602951752	4.12e-28	144
sil_1018140	3	CM009795.1	128	100000	69	0	0	1	69	601205007	601205075	4.12e-28	145
SNP_1081177	3	CM009795.1	128	100000	69	0	0	1	69	599602913	599602845	4.12e-28	147
SNP_1057213	3	CM009795.1	128	100000	69	0	0	1	69	594348173	594348105	4.12e-28	151
SNP_100028390	3	CM009795.1	117	97101	69	2	0	1	69	592767383	592767451	3.21e-24
SNP_2276306	3	CM009795.1	128	100000	69	0	0	1	69	592765403	592765335	1.92e-26	153
sil_1861767	3	CM009795.1	128	100000	69	0	0	1	69	591702888	591702956	1.92e-26	154
sil_5003362	3	CM009795.1	119	98507	67	1	0	3	69	588588057	588587991	5.33e-27
SNP_100004580	3	CM009795.1	119	98507	67	1	0	1	67	588224866	588224932	4.12e-28	156
SNP_1672000	3	CM009795.1	128	100000	69	0	0	1	69	587312351	587312283	1.92e-26	157
SNP_1224218	3	CM009795.1	128	100000	69	0	0	1	69	584986504	584986572	4.12e-28	158
sil_1695414	3	CM009795.1	122	98551	69	1	0	1	69	584984944	584985012	1.92e-26	159
sil_2290122	3	CM009795.1	128	100000	69	0	0	1	69	579034588	579034520	4.12e-28	162
SNP_2257103	3	CM009795.1	128	100000	69	0	0	1	69	576757075	576757007	4.12e-28	161
SNP_3574322	3	CM009795.1	117	97101	69	2	0	1	69	575752436	575752504	4.12e-28
sil_2275274	3	CM009795.1	119	98529	68	0	1	1	68	575461205	575461139	4.12e-28
SNP_1397650	3	CM009795.1	128	100000	69	0	0	1	69	575461202	575461270	6.90e-26	163
sil_3573800	3	CM009795.1	122	100000	66	0	0	4	69	575288373	575288308	4.12e-28
sil_5003843	3	CM009795.1	124	100000	67	0	0	1	67	571564726	571564792	4.12e-28
SNP_987498	3	CM009795.1	128	100000	69	0	0	1	69	569480695	569480763	6.90e-26	164
sil_1201639	3	CM009795.1	122	98551	69	1	0	1	69	569269528	569269460	4.12e-28	165
SNP_1024200	3	CM009795.1	128	100000	69	0	0	1	69	562149545	562149613	4.12e-28	166
sil_5005519	3	CM009795.1	122	98551	69	1	0	1	69	550463011	550462943	4.12e-28	176
sil_1069906	3	CM009795.1	122	98551	69	1	0	1	69	549670443	549670375	4.12e-28
sil_1090911	3	CM009795.1	128	100000	69	0	0	1	69	549670283	549670351	4.12e-28
SNP_1218636	3	CM009795.1	128	100000	69	0	0	1	69	543863483	543863415	4.12e-28	174
sil_1090545	3	CM009795.1	124	100000	67	0	0	1	67	542762983	542762917	4.12e-28
sil_1125482	3	CM009795.1	128	100000	69	0	0	1	69	535272134	535272066	1.92e-26	178
SNP_978304	3	CM009795.1	128	100000	69	0	0	1	69	528381299	528381367	8.92e-25	172
sil_1070933	3	CM009795.1	122	98551	69	1	0	1	69	525379153	525379221	8.92e-25	177
SNP_1012496	3	CM009795.1	122	100000	66	0	0	1	66	519629853	519629918	4.12e-28
SNP_1043022	3	CM009795.1	119	98507	67	1	0	1	67	518700880	518700946	1.92e-26
sil_1254467	3	CM009795.1	113	97015	67	2	0	1	67	518697349	518697415	5.33e-27
sil_3571796	3	CM009795.1	117	97101	69	2	0	1	69	511273744	511273676	4.12e-28
sil_5005131	3	CM009795.1	126	100000	68	0	0	2	69	510797875	510797942	4.12e-28	184
SNP_100034068	3	CM009795.1	117	97101	69	2	0	1	69	510646408	510646340	4.12e-28
SNP_100008320	3	CM009795.1	117	97101	69	2	0	1	69	510283381	510283313	4.12e-28	185
SNP_982904	3	CM009795.1	128	100000	69	0	0	1	69	509030943	509030875	4.12e-28	188
sil_4998118	3	CM009795.1	122	98551	69	1	0	1	69	507869298	507869366	4.12e-28	189
sil_1037522	3	CM009795.1	122	98551	69	1	0	1	69	507029283	507029215	4.12e-28	191
SNP_100012163	3	CM009795.1	117	97101	69	2	0	1	69	489763566	489763634	4.12e-28	194
sil_2277005	3	CM009795.1	128	100000	69	0	0	1	69	481798467	481798399	4.12e-28	197
sil_1209959	3	CM009795.1	122	98551	69	1	0	1	69	481798464	481798532	8.92e-25	198
sil_4995546	3	CM009795.1	117	97101	69	2	0	1	69	481451187	481451255	4.12e-28
SNP_980069	3	CM009795.1	122	100000	66	0	0	4	69	478110794	478110729	1.92e-26	199
SNP_1053994	3	CM009795.1	128	100000	69	0	0	1	69	468420486	468420418	4.12e-28	200
SNP_100012392	3	CM009795.1	115	97059	68	2	0	1	68	461023512	461023445	4.12e-28	201
sil_2317449	3	CM009795.1	128	100000	69	0	0	1	69	440896763	440896695	1.48e-27	202
sil_1090328	3	CM009795.1	122	98551	69	1	0	1	69	362149549	362149481	4.12e-28	204
sil_1408520	3	CM009795.1	115	97059	68	2	0	2	69	354907156	354907223	4.12e-28
sil_3572956	3	CM009795.1	117	97101	69	2	0	1	69	334470743	334470811	4.12e-28	212
sil_4995624	3	CM009795.1	117	97101	69	2	0	1	69	306580706	306580638	8.92e-25	208
sil_1092960	3	CM009795.1	122	98551	69	1	0	1	69	290766324	290766392	1.92e-26
sil_2276434	3	CM009795.1	128	100000	69	0	0	1	69	272590885	272590953	1.92e-26	205
SNP_100003438	3	CM009795.1	119	98507	67	1	0	3	69	254073633	254073699	3.21e-24
sil_1113676	3	CM009795.1	122	98551	69	1	0	1	69	242042963	242043031	8.92e-25	210
sil_4999336	3	CM009795.1	119	98507	67	1	0	3	69	236465638	236465572	1.92e-26	211
sil_1218916	3	CM009795.1	122	98551	69	1	0	1	69	222380442	222380374	4.12e-28	119
sil_4996596	3	CM009795.1	117	97101	69	2	0	1	69	202222136	202222204	4.12e-28	213
sil_4705848	3	CM009795.1	115	97101	69	1	1	1	69	200233125	200233192	4.12e-28
SNP_2255824	3	CM009795.1	128	100000	69	0	0	1	69	153927503	153927435	4.12e-28	123
sil_5010683	3	CM009795.1	115	97059	68	2	0	2	69	114166681	114166614	1.92e-26
sil_1094783	3	CM009795.1	122	98551	69	1	0	1	69	101220122	101220190	4.12e-28	171
sil_1155148	3	CM009795.1	124	100000	67	0	0	1	67	100900929	100900995	4.12e-28
sil_2276933	3	CM009795.1	117	98485	66	1	0	4	69	95162477	95162412	4.12e-28	217
sil_986643	3	CM009795.1	128	100000	69	0	0	1	69	72729813	72729881	2.48e-25	218
sil_5009137	3	CM009795.1	122	98551	69	1	0	1	69	66384022	66384090	1.48e-27
sil_1100603	3	CM009795.1	128	100000	69	0	0	1	69	66046764	66046696	1.92e-26	219
sil_1088777	3	CM009795.1	122	98551	69	1	0	1	69	66045890	66045822	6.90e-26	220
sil_5002476	3	CM009795.1	122	98551	69	1	0	1	69	63790476	63790408	1.92e-26	221
sil_1100341	3	CM009795.1	128	100000	69	0	0	1	69	51706524	51706592	4.12e-28	222
sil_1100333	3	CM009795.1	128	100000	69	0	0	1	69	50164198	50164130	4.12e-28	226
SNP_100004720	3	CM009795.1	115	97059	68	2	0	1	68	40269732	40269665	1.92e-26	229
sil_3575168	3	CM009795.1	122	98551	69	1	0	1	69	38699152	38699220	4.12e-28	231
sil_3571957	3	CM009795.1	122	98551	69	1	0	1	69	37409982	37410050	6.90e-26	237
SNP_1228607	3	CM009795.1	122	100000	66	0	0	1	66	37069911	37069976	1.92e-26
SNP_1090892	3	CM009795.1	128	100000	69	0	0	1	69	36172387	36172319	8.92e-25	234
SNP_1052434	3	CM009795.1	128	100000	69	0	0	1	69	35280067	35279999	4.12e-28	239
sil_1238025	3	CM009795.1	121	98529	68	1	0	2	69	34344779	34344712	1.92e-26	244
sil_5008201	3	CM009795.1	128	100000	69	0	0	1	69	33631723	33631791	1.92e-26
sil_5010026	3	CM009795.1	128	100000	69	0	0	1	69	33588057	33587989	1.92e-26
sil_4999139	3	CM009795.1	113	97015	67	2	0	3	69	33121810	33121876	1.92e-26
sil_5002444	3	CM009795.1	128	100000	69	0	0	1	69	33106418	33106350	1.92e-26
SNP_100002531	3	CM009795.1	122	98551	69	1	0	1	69	33102614	33102546	8.92e-25
sil_1243888	3	CM009795.1	128	100000	69	0	0	1	69	26625019	26625087	5.33e-27	247
sil_1115146	3	CM009795.1	128	100000	69	0	0	1	69	26344865	26344933	8.92e-25	248
SNP_2244760	3	CM009795.1	122	98551	69	1	0	1	69	23239566	23239634	4.12e-28	250
sil_3571017	3	CM009795.1	122	98551	69	1	0	1	69	23239455	23239523	1.92e-26	251
sil_3573797	3	CM009795.1	113	97015	67	2	0	2	68	20879353	20879287	1.48e-27
sil_1006017	3	CM009795.1	122	98551	69	1	0	1	69	20576149	20576081	4.12e-28	253
SNP_100013400	3	CM009795.1	117	97101	69	2	0	1	69	17171789	17171857	1.92e-26
sil_4990774	3	CM009795.1	117	97101	69	2	0	1	69	17171789	17171857	1.92e-26
sil_1122089	3	CM009795.1	122	98551	69	1	0	1	69	15415888	15415820	1.92e-26
sil_1132761	3	CM009795.1	128	100000	69	0	0	1	69	15389660	15389728	4.12e-28	265
SNP_1249812	3	CM009795.1	128	100000	69	0	0	1	69	15308579	15308511	1.92e-26	264
sil_4544043	3	CM009795.1	117	97101	69	2	0	1	69	13688015	13688083	1.92e-26
sil_3951639	3	CM009795.1	128	100000	69	0	0	1	69	13414635	13414567	1.92e-26
sil_5010508	3	CM009795.1	122	98551	69	1	0	1	69	9404105	9404173	1.92e-26
sil_1122676	3	CM009795.1	128	100000	69	0	0	1	69	9143737	9143805	8.92e-25
sil_2289296	3	CM009795.1	128	100000	69	0	0	1	69	8928541	8928609	4.12e-28	272
sil_5007014	3	CM009795.1	117	98485	66	1	0	4	69	8914432	8914497	1.92e-26
sil_1070849	3	CM009795.1	128	100000	69	0	0	1	69	8903172	8903104	1.92e-26	273
sil_984569	3	CM009795.1	128	100000	69	0	0	1	69	8883548	8883480	1.48e-27	274
sil_1110446	3	CM009795.1	128	100000	69	0	0	1	69	8486451	8486383	4.12e-28	277
sil_1321186	3	CM009795.1	122	98551	69	1	0	1	69	7889522	7889590	1.15e-23
sil_2256900	3	CM009795.1	117	97101	69	2	0	1	69	7773849	7773781	1.92e-26	278
sil_5003505	3	CM009795.1	128	100000	69	0	0	1	69	7299187	7299255	4.12e-28
sil_1235733	3	CM009795.1	128	100000	69	0	0	1	69	6911687	6911619	1.92e-26	279
sil_1033885	3	CM009795.1	128	100000	69	0	0	1	69	6319494	6319426	1.92e-26	281
sil_4995848	3	CM009795.1	128	100000	69	0	0	1	69	5812758	5812826	1.92e-26
sil_2261257	3	CM009795.1	122	98551	69	1	0	1	69	5422467	5422399	1.92e-26	283
sil_1156116	3	CM009795.1	128	100000	69	0	0	1	69	5407159	5407227	3.21e-24	284
sil_1206733	3	CM009795.1	117	97101	69	2	0	1	69	4610857	4610925	5.33e-27
sil_2280333	3	CM009795.1	124	100000	67	0	0	3	69	4329669	4329603	4.12e-28
sil_1409069	3	CM009795.1	122	98551	69	1	0	1	69	4036801	4036869	1.92e-26
sil_5005928	3	CM009795.1	122	98551	69	1	0	1	69	4023864	4023796	8.92e-25
sil_5007907	3	CM009795.1	126	100000	68	0	0	2	69	3434946	3434879	1.92e-26	294
sil_1126106	3	CM009795.1	128	100000	69	0	0	1	69	2555624	2555556	1.92e-26
sil_1053031	3	CM009795.1	122	100000	66	0	0	1	66	1902857	1902922	3.21e-24
sil_1228932	3	CM009795.1	117	97101	69	2	0	1	69	1770318	1770386	4.12e-28
SNP_1093199	3	CM009795.1	128	100000	69	0	0	1	69	1619867	1619799	8.92e-25	289
sil_1016226	3	CM009795.1	128	100000	69	0	0	1	69	419294	419226	3.21e-24	296
sil_1228713	3	CM009795.1	128	100000	69	0	0	1	69	72636	72704	1.92e-26
sil_1038318	3	CM009795.1	128	100000	69	0	0	1	69	37047	37115	6.90e-26
sil_3573616	4	CM009796.1	117	97101	69	2	0	1	69	619206876	619206808	4.12e-28
sil_5005685	4	CM009796.1	122	98551	69	1	0	1	69	618804528	618804596	8.92e-25
sil_1108568	4	CM009796.1	122	98551	69	1	0	1	69	617609803	617609735	1.92e-26	131
sil_5001615	4	CM009796.1	117	97101	69	2	0	1	69	617241912	617241980	3.21e-24	132
sil_4999645	4	CM009796.1	128	100000	69	0	0	1	69	615479545	615479613	8.92e-25
SNP_100023533	4	CM009796.1	117	97101	69	2	0	1	69	615462246	615462314	1.15e-23	133
SNP_1112356	4	CM009796.1	122	98551	69	1	0	1	69	613999691	613999623	4.12e-28	1
sil_5002492	4	CM009796.1	128	100000	69	0	0	1	69	613146066	613145998	8.92e-25
sil_2325790	4	CM009796.1	115	97059	68	2	0	1	68	613121254	613121187	1.92e-26	2
sil_5010553	4	CM009796.1	117	97101	69	2	0	1	69	612689389	612689321	8.92e-25
sil_4995486	4	CM009796.1	117	97101	69	2	0	1	69	612689389	612689321	4.12e-28
sil_5001624	4	CM009796.1	117	97101	69	2	0	1	69	611902452	611902520	8.92e-25	4
sil_3571452	4	CM009796.1	113	97015	67	2	0	1	67	611396196	611396130	5.33e-27
sil_1274793	4	CM009796.1	128	100000	69	0	0	1	69	611305656	611305588	8.92e-25
sil_5007761	4	CM009796.1	122	98551	69	1	0	1	69	610783567	610783635	1.92e-26
sil_5007926	4	CM009796.1	122	98551	69	1	0	1	69	610782297	610782229	3.21e-24
sil_5003936	4	CM009796.1	122	98551	69	1	0	1	69	610321516	610321584	4.12e-28
sil_3575635	4	CM009796.1	122	98551	69	1	0	1	69	610051956	610051888	6.90e-26
sil_1063157	4	CM009796.1	122	98551	69	1	0	1	69	608682270	608682338	1.92e-26	9
sil_1176591	4	CM009796.1	128	100000	69	0	0	1	69	608364603	608364671	1.15e-23	10
SNP_1213343	4	CM009796.1	128	100000	69	0	0	1	69	608185729	608185661	8.92e-25	12
sil_4995642	4	CM009796.1	128	100000	69	0	0	1	69	607800571	607800503	8.92e-25
sil_5004726	4	CM009796.1	119	98507	67	1	0	2	68	607365416	607365350	4.12e-28
sil_5001811	4	CM009796.1	119	98507	67	1	0	2	68	607365416	607365350	8.92e-25
sil_4997867	4	CM009796.1	122	98551	69	1	0	1	69	607245597	607245529	8.92e-25
sil_3571277	4	CM009796.1	115	97101	69	1	1	1	69	607178844	607178911	8.92e-25
sil_1126600	4	CM009796.1	128	100000	69	0	0	1	69	605932946	605933014	8.92e-25
sil_1038847	4	CM009796.1	122	98551	69	1	0	1	69	604497855	604497923	1.92e-26	14
SNP_100005101	4	CM009796.1	122	98551	69	1	0	1	69	603601084	603601016	2.48e-25	15
sil_5005669	4	CM009796.1	117	97101	69	2	0	1	69	602919185	602919253	1.92e-26
sil_1022098	4	CM009796.1	128	100000	69	0	0	1	69	597592342	597592410	4.12e-28	19
sil_1094279	4	CM009796.1	128	100000	69	0	0	1	69	591165171	591165103	1.92e-26
sil_1021577	4	CM009796.1	117	97101	69	2	0	1	69	582665397	582665329	8.92e-25	27
sil_1029355	4	CM009796.1	128	100000	69	0	0	1	69	579699448	579699516	8.92e-25	33
sil_1109272	4	CM009796.1	119	98507	67	1	0	1	67	567224082	567224148	8.92e-25	36
SNP_100008937	4	CM009796.1	117	98507	67	0	1	1	67	561240934	561240999	8.92e-25
sil_3955814	4	CM009796.1	122	98551	69	1	0	1	69	557860001	557860069	1.92e-26	37
sil_1202938	4	CM009796.1	128	100000	69	0	0	1	69	551837790	551837722	4.12e-28	40
sil_3571520	4	CM009796.1	121	98529	68	1	0	1	68	551813775	551813842	1.92e-26	39
sil_3573256	4	CM009796.1	124	100000	67	0	0	1	67	548054442	548054376	1.48e-27
sil_987463	4	CM009796.1	122	98551	69	1	0	1	69	548054439	548054507	8.92e-25	38
SNP_100003336	4	CM009796.1	115	97101	69	1	1	1	69	548048938	548049005	5.33e-27	44
sil_1206288	4	CM009796.1	128	100000	69	0	0	1	69	539481162	539481230	3.21e-24	46
sil_5002844	4	CM009796.1	117	97101	69	2	0	1	69	533526007	533525939	8.92e-25	47
sil_1049959	4	CM009796.1	128	100000	69	0	0	1	69	500758955	500758887	8.92e-25	49
sil_1124848	4	CM009796.1	117	97101	69	2	0	1	69	496877025	496876957	5.33e-27
sil_3572612	4	CM009796.1	117	97101	69	2	0	1	69	495154567	495154635	1.92e-26
sil_4994315	4	CM009796.1	117	97101	69	2	0	1	69	490628666	490628734	8.92e-25
sil_5003070	4	CM009796.1	122	98551	69	1	0	1	69	477098083	477098015	4.12e-28	50
sil_1041112	4	CM009796.1	128	100000	69	0	0	1	69	381016400	381016332	1.92e-26	53
sil_1081625	4	CM009796.1	115	97059	68	2	0	1	68	363318954	363319021	3.21e-24	70
sil_4997753	4	CM009796.1	119	98507	67	1	0	1	67	354830356	354830290	8.92e-25
sil_3573332	4	CM009796.1	122	98551	69	1	0	1	69	354814197	354814129	6.90e-26
sil_1093517	4	CM009796.1	128	100000	69	0	0	1	69	309197764	309197696	6.90e-26
sil_2276016	4	CM009796.1	117	97101	69	2	0	1	69	295067242	295067310	1.92e-26	65
sil_3570407	4	CM009796.1	122	98551	69	1	0	1	69	262638291	262638359	3.21e-24	58
sil_4998821	4	CM009796.1	122	98551	69	1	0	1	69	262638039	262637971	4.12e-28	57
sil_3572346	4	CM009796.1	117	97101	69	2	0	1	69	250980436	250980368	8.92e-25	62
sil_1088742	4	CM009796.1	128	100000	69	0	0	1	69	194349014	194349082	1.92e-26	71
sil_5009231	4	CM009796.1	115	97059	68	2	0	2	69	188261822	188261755	1.92e-26
sil_3953519	4	CM009796.1	113	97015	67	2	0	3	69	160443840	160443774	3.21e-24
sil_1094018	4	CM009796.1	122	100000	66	0	0	1	66	155482037	155481972	5.33e-27
SNP_100001440	4	CM009796.1	117	97101	69	2	0	1	69	143957881	143957813	4.12e-28
sil_3571686	4	CM009796.1	117	97101	69	2	0	1	69	125905820	125905752	1.92e-26
SNP_100003060	4	CM009796.1	117	97101	69	2	0	1	69	124038716	124038784	3.21e-24	66
sil_2243981	4	CM009796.1	128	100000	69	0	0	1	69	104984570	104984638	4.12e-28	118
sil_1104833	4	CM009796.1	128	100000	69	0	0	1	69	103226956	103227024	8.92e-25	74
SNP_2276667	4	CM009796.1	128	100000	69	0	0	1	69	89794616	89794548	1.92e-26	75
sil_1737778	4	CM009796.1	128	100000	69	0	0	1	69	89309557	89309625	8.92e-25
sil_4996632	4	CM009796.1	128	100000	69	0	0	1	69	89309238	89309306	1.92e-26
sil_4995571	4	CM009796.1	117	97101	69	2	0	1	69	65128581	65128513	8.92e-25	76
sil_1202665	4	CM009796.1	128	100000	69	0	0	1	69	63358606	63358674	4.12e-28	77
SNP_1036953	4	CM009796.1	128	100000	69	0	0	1	69	60930709	60930777	4.12e-28	78
SNP_100005057	4	CM009796.1	122	98551	69	1	0	1	69	51940464	51940532	6.90e-26	80
sil_5003689	4	CM009796.1	122	98551	69	1	0	1	69	44468964	44468896	1.92e-26	81
sil_1395477	4	CM009796.1	128	100000	69	0	0	1	69	37682028	37682096	1.92e-26	83
sil_4997248	4	CM009796.1	122	98551	69	1	0	1	69	37117019	37117087	4.12e-28	85
sil_1074654	4	CM009796.1	128	100000	69	0	0	1	69	36832866	36832798	1.15e-23	84
sil_1066964	4	CM009796.1	117	97101	69	2	0	1	69	35155872	35155940	4.12e-28	86
SNP_1074086	4	CM009796.1	128	100000	69	0	0	1	69	31385634	31385566	6.90e-26	91
sil_1120094	4	CM009796.1	128	100000	69	0	0	1	69	26652676	26652608	4.12e-28	92
sil_1022573	4	CM009796.1	126	100000	68	0	0	1	68	19919591	19919524	6.90e-26	93
SNP_1672793	4	CM009796.1	128	100000	69	0	0	1	69	15185400	15185332	8.92e-25	97
sil_1100580	4	CM009796.1	128	100000	69	0	0	1	69	15075143	15075075	1.92e-26	96
sil_1166056	4	CM009796.1	128	100000	69	0	0	1	69	15074973	15075041	4.12e-28	95
sil_5002216	4	CM009796.1	117	97101	69	2	0	1	69	14744312	14744244	4.12e-28	98
sil_1401166	4	CM009796.1	111	97015	67	1	1	1	67	14355218	14355283	8.92e-25
SNP_100000255	4	CM009796.1	126	100000	68	0	0	1	68	14330164	14330097	2.48e-25
sil_1108448	4	CM009796.1	122	98551	69	1	0	1	69	14258933	14258865	1.92e-26
sil_1724617	4	CM009796.1	122	98551	69	1	0	1	69	14258930	14258998	1.92e-26
sil_1210127	4	CM009796.1	128	100000	69	0	0	1	69	12372791	12372859	8.92e-25	106
sil_2256805	4	CM009796.1	128	100000	69	0	0	1	69	11900090	11900022	1.92e-26	108
sil_3064357	4	CM009796.1	122	98551	69	1	0	1	69	9793846	9793778	1.92e-26	105
sil_5006117	4	CM009796.1	117	97101	69	2	0	1	69	8033748	8033680	1.92e-26
SNP_2241770	4	CM009796.1	128	100000	69	0	0	1	69	7442347	7442279	4.12e-28	113
sil_2250109	4	CM009796.1	122	98551	69	1	0	1	69	6617758	6617826	4.12e-28
SNP_1184087	4	CM009796.1	128	100000	69	0	0	1	69	6439704	6439772	1.92e-26	115
sil_1102711	4	CM009796.1	128	100000	69	0	0	1	69	3168316	3168248	1.92e-26	121
sil_1165948	4	CM009796.1	128	100000	69	0	0	1	69	2894765	2894833	1.92e-26
sil_1307580	4	CM009796.1	128	100000	69	0	0	1	69	2857318	2857386	8.92e-25
sil_1251531	4	CM009796.1	128	100000	69	0	0	1	69	2857255	2857187	3.21e-24
sil_3064755	4	CM009796.1	122	98551	69	1	0	1	69	2240758	2240826	3.21e-24
sil_3572544	4	CM009796.1	122	100000	66	0	0	1	66	2202273	2202208	1.15e-23
SNP_1287183	4	CM009796.1	128	100000	69	0	0	1	69	1856088	1856156	6.90e-26	125
sil_1060737	4	CM009796.1	124	100000	67	0	0	1	67	1028424	1028358	8.92e-25	129
sil_1125279	4	CM009796.1	128	100000	69	0	0	1	69	1028421	1028489	1.92e-26	128
sil_1218614	4	CM009796.1	122	98551	69	1	0	1	69	1028196	1028264	6.90e-26	126
sil_5005911	5	CM009797.1	122	100000	66	0	0	1	66	593	528	8.92e-25
sil_5004564	5	CM009797.1	113	97059	68	1	1	3	69	3140057	3140124	1.92e-26
SNP_100010751	5	CM009797.1	122	98551	69	1	0	1	69	3591456	3591524	5.33e-27
SNP_1769209	5	CM009797.1	128	100000	69	0	0	1	69	3872112	3872180	8.92e-25
SNP_100003305	5	CM009797.1	122	98551	69	1	0	1	69	4199381	4199313	8.92e-25
SNP_100016206	5	CM009797.1	128	100000	69	0	0	1	69	5095997	5096065	4.12e-28
sil_4994418	5	CM009797.1	128	100000	69	0	0	1	69	6344660	6344592	1.92e-26
sil_5001758	5	CM009797.1	126	100000	68	0	0	2	69	6516327	6516260	6.90e-26	4
SNP_100005593	5	CM009797.1	126	100000	68	0	0	1	68	7592165	7592232	8.92e-25
sil_3938418	5	CM009797.1	122	98551	69	1	0	1	69	9565873	9565805	1.92e-26	6
SNP_997503	5	CM009797.1	128	100000	69	0	0	1	69	9610357	9610425	6.90e-26	7
SNP_3959157	5	CM009797.1	128	100000	69	0	0	1	69	9610666	9610598	1.15e-23	8
sil_2323152	5	CM009797.1	122	98551	69	1	0	1	69	10866875	10866807	6.90e-26
sil_2279209	5	CM009797.1	128	100000	69	0	0	1	69	13909211	13909143	8.92e-25
SNP_1324964	5	CM009797.1	128	100000	69	0	0	1	69	14431594	14431526	8.92e-25	11
sil_5001993	5	CM009797.1	117	97101	69	2	0	1	69	15351253	15351321	1.92e-26
sil_979714	5	CM009797.1	122	98551	69	1	0	1	69	15351253	15351321	1.92e-26
sil_994992	5	CM009797.1	122	98551	69	1	0	1	69	16272073	16272005	4.12e-28	10
SNP_3384826	5	CM009797.1	124	100000	67	0	0	1	67	20041600	20041534	8.92e-25
sil_4997971	5	CM009797.1	122	98551	69	1	0	1	69	20598862	20598930	1.92e-26
sil_1114630	5	CM009797.1	128	100000	69	0	0	1	69	20871978	20871910	8.92e-25	14
SNP_1130731	5	CM009797.1	128	100000	69	0	0	1	69	20878972	20878904	5.33e-27	15
sil_3571762	5	CM009797.1	128	100000	69	0	0	1	69	21166272	21166204	6.90e-26
sil_1063116	5	CM009797.1	121	98529	68	1	0	1	68	21277421	21277354	4.12e-28
sil_3571337	5	CM009797.1	111	97015	67	1	1	1	67	21278765	21278830	2.48e-25
sil_3573592	5	CM009797.1	117	98507	67	0	1	1	67	21278765	21278830	8.92e-25
SNP_1093315	5	CM009797.1	128	100000	69	0	0	1	69	21442824	21442892	1.92e-26	17
SNP_1000068	5	CM009797.1	128	100000	69	0	0	1	69	21860294	21860226	8.92e-25	18
SNP_1145048	5	CM009797.1	128	100000	69	0	0	1	69	22394477	22394545	8.92e-25
sil_5010348	5	CM009797.1	119	98507	67	1	0	1	67	22905286	22905220	3.21e-24
sil_1013863	5	CM009797.1	126	100000	68	0	0	1	68	27236002	27235935	1.92e-26	22
sil_1034344	5	CM009797.1	128	100000	69	0	0	1	69	27244888	27244820	1.92e-26	21
sil_1864468	5	CM009797.1	128	100000	69	0	0	1	69	27768578	27768510	8.92e-25	24
sil_986784	5	CM009797.1	122	98551	69	1	0	1	69	28976269	28976337	1.92e-26	26
sil_1087863	5	CM009797.1	122	100000	66	0	0	1	66	30385834	30385899	4.12e-28
SNP_1171743	5	CM009797.1	128	100000	69	0	0	1	69	31277037	31277105	1.92e-26	27
sil_1106960	5	CM009797.1	128	100000	69	0	0	1	69	31929546	31929478	1.92e-26	29
sil_1115438	5	CM009797.1	117	97101	69	2	0	1	69	35254402	35254334	4.12e-28	30
sil_1101228	5	CM009797.1	122	98551	69	1	0	1	69	37382769	37382837	8.92e-25
sil_1111438	5	CM009797.1	122	98551	69	1	0	1	69	37680626	37680694	4.12e-28	33
sil_5004144	5	CM009797.1	117	97101	69	2	0	1	69	38857815	38857883	8.92e-25
SNP_100003881	5	CM009797.1	117	97101	69	2	0	1	69	38857815	38857883	8.92e-25
sil_1068597	5	CM009797.1	122	98551	69	1	0	1	69	38863900	38863832	8.92e-25	36
sil_1099890	5	CM009797.1	121	98529	68	1	0	1	68	38942933	38943000	8.92e-25	37
sil_1722458	5	CM009797.1	117	97101	69	2	0	1	69	40980355	40980423	4.12e-28
sil_5007004	5	CM009797.1	128	100000	69	0	0	1	69	41744496	41744428	8.92e-25	40
sil_5001646	5	CM009797.1	115	97101	69	1	1	1	69	43038850	43038783	1.92e-26	41
sil_1228444	5	CM009797.1	128	100000	69	0	0	1	69	43043254	43043186	1.15e-23	42
sil_5009922	5	CM009797.1	115	97059	68	2	0	1	68	43058692	43058625	1.92e-26	43
sil_1032579	5	CM009797.1	128	100000	69	0	0	1	69	43068146	43068214	8.92e-25	44
sil_1063095	5	CM009797.1	117	97101	69	2	0	1	69	43068149	43068081	1.92e-26	45
SNP_3575099	5	CM009797.1	117	97101	69	2	0	1	69	43193393	43193325	3.21e-24
sil_1092315	5	CM009797.1	128	100000	69	0	0	1	69	49755773	49755841	1.92e-26	49
sil_1075215	5	CM009797.1	128	100000	69	0	0	1	69	53274515	53274447	8.92e-25	50
sil_2277133	5	CM009797.1	128	100000	69	0	0	1	69	53312536	53312604	3.21e-24	51
SNP_1102928	5	CM009797.1	128	100000	69	0	0	1	69	54179572	54179504	8.92e-25	52
sil_3570221	5	CM009797.1	117	97101	69	2	0	1	69	62791091	62791159	4.12e-28
sil_3573185	5	CM009797.1	128	100000	69	0	0	1	69	62813589	62813657	2.48e-25	57
sil_3572416	5	CM009797.1	117	97101	69	2	0	1	69	62924483	62924551	8.92e-25
sil_5002445	5	CM009797.1	122	98551	69	1	0	1	69	65492885	65492817	1.92e-26
SNP_1201414	5	CM009797.1	128	100000	69	0	0	1	69	70165363	70165295	8.92e-25	60
sil_5006864	5	CM009797.1	124	100000	67	0	0	1	67	70853769	70853703	4.12e-28	61
SNP_3574466	5	CM009797.1	122	98551	69	1	0	1	69	71320193	71320125	1.15e-23	293
sil_1864986	5	CM009797.1	122	98551	69	1	0	1	69	75838872	75838804	1.92e-26	64
sil_5009019	5	CM009797.1	117	97101	69	2	0	1	69	75838872	75838804	6.90e-26	65
sil_1108724	5	CM009797.1	128	100000	69	0	0	1	69	75973561	75973629	8.92e-25	66
sil_5001366	5	CM009797.1	121	98529	68	1	0	2	69	82134279	82134212	3.21e-24
sil_1070054	5	CM009797.1	122	98551	69	1	0	1	69	95443512	95443580	8.92e-25	68
sil_986273	5	CM009797.1	128	100000	69	0	0	1	69	104355636	104355704	8.92e-25	69
sil_1063299	5	CM009797.1	128	100000	69	0	0	1	69	122594971	122595039	8.92e-25	71
SNP_3575315	5	CM009797.1	122	98551	69	1	0	1	69	127756908	127756840	2.48e-25	73
SNP_1273207	5	CM009797.1	128	100000	69	0	0	1	69	129335070	129335138	4.12e-28	74
sil_5004322	5	CM009797.1	117	97101	69	2	0	1	69	134738885	134738953	4.12e-28
sil_1218006	5	CM009797.1	122	98551	69	1	0	1	69	138477332	138477264	4.12e-28	77
sil_1026910	5	CM009797.1	128	100000	69	0	0	1	69	150334764	150334832	1.15e-23	84
sil_5002362	5	CM009797.1	122	98551	69	1	0	1	69	191394924	191394856	1.92e-26
SNP_3574123	5	CM009797.1	128	100000	69	0	0	1	69	210843932	210844000	8.92e-25	93
sil_1123638	5	CM009797.1	128	100000	69	0	0	1	69	219281633	219281701	8.92e-25	94
sil_979056	5	CM009797.1	117	97101	69	2	0	1	69	225716776	225716844	1.48e-27	75
sil_5009498	5	CM009797.1	119	98507	67	1	0	3	69	233756914	233756848	3.21e-24
sil_5002121	5	CM009797.1	117	97101	69	2	0	1	69	259945379	259945447	4.12e-28	79
sil_1147769	5	CM009797.1	128	100000	69	0	0	1	69	274723719	274723787	6.90e-26	98
SNP_1052648	5	CM009797.1	122	98551	69	1	0	1	69	280784407	280784339	8.92e-25	92
sil_3570543	5	CM009797.1	128	100000	69	0	0	1	69	282881966	282882034	2.48e-25	99
sil_1019706	5	CM009797.1	128	100000	69	0	0	1	69	292711412	292711344	8.92e-25	100
sil_1402673	5	CM009797.1	117	97101	69	2	0	1	69	295282535	295282603	1.92e-26
sil_1061794	5	CM009797.1	122	98551	69	1	0	1	69	297463512	297463444	8.92e-25	96
SNP_1047731	5	CM009797.1	128	100000	69	0	0	1	69	307739803	307739871	8.92e-25	101
sil_1136780	5	CM009797.1	128	100000	69	0	0	1	69	313544048	313543980	8.92e-25	97
sil_3020533	5	CM009797.1	128	100000	69	0	0	1	69	317740292	317740224	6.90e-26	264
SNP_100014532	5	CM009797.1	117	97101	69	2	0	1	69	319350053	319350121	3.21e-24	102
sil_1104821	5	CM009797.1	122	98551	69	1	0	1	69	322959002	322959070	8.92e-25	104
SNP_2288961	5	CM009797.1	128	100000	69	0	0	1	69	322968759	322968827	8.92e-25	105
sil_3570280	5	CM009797.1	128	100000	69	0	0	1	69	323113270	323113338	3.21e-24	106
sil_1311167	5	CM009797.1	122	98551	69	1	0	1	69	346499280	346499348	2.48e-25	78
sil_5001770	5	CM009797.1	128	100000	69	0	0	1	69	347119488	347119556	1.48e-27	107
sil_4998513	5	CM009797.1	128	100000	69	0	0	1	69	347119491	347119423	4.12e-28	108
sil_1092072	5	CM009797.1	128	100000	69	0	0	1	69	347843378	347843446	1.92e-26	109
sil_5007200	5	CM009797.1	117	97101	69	2	0	1	69	349316244	349316176	2.48e-25
sil_1100687	5	CM009797.1	128	100000	69	0	0	1	69	359497299	359497367	3.21e-24	111
sil_2275872	5	CM009797.1	128	100000	69	0	0	1	69	374513804	374513872	4.12e-28	112
sil_3572034	5	CM009797.1	128	100000	69	0	0	1	69	376728249	376728181	1.92e-26	118
sil_1219561	5	CM009797.1	128	100000	69	0	0	1	69	378839596	378839528	1.92e-26	119
SNP_100003803	5	CM009797.1	121	98551	69	0	1	1	69	378856978	378856911	4.12e-28
SNP_1089360	5	CM009797.1	128	100000	69	0	0	1	69	386360771	386360839	6.90e-26	114
sil_1100953	5	CM009797.1	128	100000	69	0	0	1	69	386478333	386478265	8.92e-25	115
SNP_100111691	5	CM009797.1	117	97101	69	2	0	1	69	386552181	386552249	1.92e-26	117
sil_1309422	5	CM009797.1	117	97101	69	2	0	1	69	388616344	388616276	4.12e-28
sil_3575800	5	CM009797.1	122	98551	69	1	0	1	69	403255620	403255688	3.21e-24	120
sil_1281357	5	CM009797.1	128	100000	69	0	0	1	69	406060120	406060052	8.92e-25	123
sil_5001421	5	CM009797.1	115	97059	68	2	0	2	69	409522641	409522574	4.12e-28	122
sil_1699384	5	CM009797.1	128	100000	69	0	0	1	69	409897792	409897724	3.21e-24	121
SNP_981730	5	CM009797.1	128	100000	69	0	0	1	69	412700900	412700832	8.92e-25	125
sil_2277099	5	CM009797.1	128	100000	69	0	0	1	69	413486725	413486793	4.12e-28	128
SNP_2329847	5	CM009797.1	128	100000	69	0	0	1	69	418270883	418270951	1.92e-26	131
SNP_1061058	5	CM009797.1	128	100000	69	0	0	1	69	418579285	418579217	1.92e-26	132
sil_990542	5	CM009797.1	122	98551	69	1	0	1	69	429567326	429567394	8.92e-25	135
sil_1092246	5	CM009797.1	128	100000	69	0	0	1	69	429797143	429797075	1.92e-26	136
SNP_1048923	5	CM009797.1	128	100000	69	0	0	1	69	431405242	431405174	4.12e-28	137
sil_1201600	5	CM009797.1	122	98551	69	1	0	1	69	432432835	432432767	1.92e-26	138
SNP_3574280	5	CM009797.1	122	98551	69	1	0	1	69	432618431	432618363	1.92e-26	139
sil_1215068	5	CM009797.1	117	98485	66	1	0	1	66	432618944	432619009	1.92e-26	140
sil_5001980	5	CM009797.1	121	98529	68	1	0	1	68	433402755	433402822	4.12e-28	141
sil_982983	5	CM009797.1	121	98551	69	0	1	1	69	437981514	437981581	1.92e-26	148
sil_1696462	5	CM009797.1	117	97101	69	2	0	1	69	441901205	441901273	1.92e-26	151
sil_2275994	5	CM009797.1	122	98551	69	1	0	1	69	445424007	445423939	3.21e-24	153
sil_3384639	5	CM009797.1	115	97101	69	0	2	1	69	445424007	445423941	4.12e-28	154
sil_1138786	5	CM009797.1	122	98551	69	1	0	1	69	447136034	447135966	1.92e-26	155
sil_1259170	5	CM009797.1	122	98551	69	1	0	1	69	449406506	449406574	8.92e-25	169
sil_2327838	5	CM009797.1	128	100000	69	0	0	1	69	449486098	449486030	6.90e-26	170
sil_1072366	5	CM009797.1	122	98551	69	1	0	1	69	449763022	449762954	4.12e-28	171
sil_1217186	5	CM009797.1	122	98551	69	1	0	1	69	449770567	449770499	1.92e-26	172
sil_2326504	5	CM009797.1	128	100000	69	0	0	1	69	449773756	449773824	4.12e-28	173
sil_1102520	5	CM009797.1	113	97059	68	1	1	1	68	449881511	449881577	1.92e-26
sil_1102024	5	CM009797.1	128	100000	69	0	0	1	69	449881652	449881584	6.90e-26	174
sil_4994736	5	CM009797.1	122	100000	66	0	0	2	67	451324157	451324092	4.12e-28
sil_1380520	5	CM009797.1	128	100000	69	0	0	1	69	452017805	452017737	1.92e-26
SNP_2278040	5	CM009797.1	122	98551	69	1	0	1	69	452240734	452240802	2.48e-25	157
SNP_1095481	5	CM009797.1	128	100000	69	0	0	1	69	452240737	452240669	2.48e-25	158
SNP_1116958	5	CM009797.1	117	98485	66	1	0	1	66	452249415	452249480	3.21e-24	159
sil_4008653	5	CM009797.1	115	97059	68	2	0	2	69	452432698	452432631	8.92e-25	160
sil_1080750	5	CM009797.1	117	98485	66	1	0	1	66	452746842	452746907	8.92e-25
SNP_1129821	5	CM009797.1	117	97101	69	2	0	1	69	453281104	453281036	2.48e-25	161
sil_1125046	5	CM009797.1	113	97015	67	2	0	1	67	453702219	453702285	8.92e-25
SNP_1364455	5	CM009797.1	128	100000	69	0	0	1	69	453784366	453784434	1.92e-26	164
sil_982074	5	CM009797.1	128	100000	69	0	0	1	69	454080076	454080008	3.21e-24	165
SNP_3575054	5	CM009797.1	115	97059	68	2	0	1	68	454100514	454100581	8.92e-25	166
sil_2289328	5	CM009797.1	128	100000	69	0	0	1	69	455218814	455218746	8.92e-25	176
sil_978303	5	CM009797.1	126	100000	68	0	0	1	68	455856743	455856676	4.12e-28	175
SNP_4542295	5	CM009797.1	128	100000	69	0	0	1	69	457490954	457491022	4.12e-28	177
SNP_998347	5	CM009797.1	128	100000	69	0	0	1	69	470903390	470903322	1.92e-26	179
SNP_1861814	5	CM009797.1	126	100000	68	0	0	1	68	473003907	473003840	2.48e-25
sil_3575762	5	CM009797.1	122	98551	69	1	0	1	69	478239038	478238970	1.92e-26	183
sil_3953456	5	CM009797.1	128	100000	69	0	0	1	69	480881614	480881682	1.15e-23	184
sil_1035655	5	CM009797.1	128	100000	69	0	0	1	69	481043975	481043907	5.33e-27	187
sil_1071833	5	CM009797.1	122	98551	69	1	0	1	69	481362713	481362645	8.92e-25	186
SNP_100006772	5	CM009797.1	128	100000	69	0	0	1	69	483405175	483405107	4.12e-28	192
sil_5007069	5	CM009797.1	121	98529	68	1	0	2	69	485685744	485685677	1.92e-26	193
sil_5003492	5	CM009797.1	117	97101	69	2	0	1	69	485870949	485870881	3.21e-24	194
sil_5001862	5	CM009797.1	128	100000	69	0	0	1	69	491827489	491827421	1.92e-26	189
SNP_2295110	5	CM009797.1	126	100000	68	0	0	1	68	492098736	492098669	8.92e-25	190
SNP_999421	5	CM009797.1	128	100000	69	0	0	1	69	494695262	494695330	4.12e-28	196
SNP_1239323	5	CM009797.1	128	100000	69	0	0	1	69	497633586	497633654	5.33e-27	199
SNP_1306533	5	CM009797.1	128	100000	69	0	0	1	69	500690095	500690027	3.21e-24	200
sil_1216407	5	CM009797.1	128	100000	69	0	0	1	69	503174527	503174459	8.92e-25	202
sil_5009375	5	CM009797.1	117	98507	67	0	1	3	69	512379626	512379561	8.92e-25
sil_3574694	5	CM009797.1	124	100000	67	0	0	1	67	514831609	514831675	4.12e-28
sil_2288531	5	CM009797.1	128	100000	69	0	0	1	69	514831878	514831810	1.15e-23
SNP_1100749	5	CM009797.1	128	100000	69	0	0	1	69	516751433	516751365	8.92e-25	206
sil_1023493	5	CM009797.1	128	100000	69	0	0	1	69	518959763	518959831	4.12e-28	209
SNP_100112243	5	CM009797.1	121	98529	68	1	0	2	69	519152692	519152759	8.92e-25	210
sil_988741	5	CM009797.1	122	98551	69	1	0	1	69	519219764	519219832	1.92e-26	212
sil_1018217	5	CM009797.1	122	98551	69	1	0	1	69	521996727	521996659	2.48e-25	213
SNP_1859943	5	CM009797.1	117	97101	69	2	0	1	69	522330383	522330315	1.15e-23	211
sil_987857	5	CM009797.1	122	98551	69	1	0	1	69	522928951	522929019	8.92e-25	214
SNP_1136198	5	CM009797.1	128	100000	69	0	0	1	69	523025574	523025642	3.21e-24	216
sil_1008777	5	CM009797.1	122	98551	69	1	0	1	69	523143927	523143859	1.48e-27	217
sil_4997111	5	CM009797.1	121	98529	68	1	0	1	68	523918260	523918327	8.92e-25	218
sil_3956697	5	CM009797.1	122	98551	69	1	0	1	69	524295826	524295758	1.92e-26
sil_1021876	5	CM009797.1	117	97101	69	2	0	1	69	525621851	525621783	8.92e-25
sil_1095345	5	CM009797.1	122	98551	69	1	0	1	69	525621851	525621783	3.21e-24	222
sil_5003435	5	CM009797.1	122	98551	69	1	0	1	69	525796058	525795990	8.92e-25	221
sil_4996184	5	CM009797.1	128	100000	69	0	0	1	69	525897483	525897415	1.92e-26
SNP_1066550	5	CM009797.1	128	100000	69	0	0	1	69	527842423	527842491	4.12e-28	224
sil_1062335	5	CM009797.1	122	98551	69	1	0	1	69	533483249	533483181	1.15e-23	228
sil_992433	5	CM009797.1	122	98551	69	1	0	1	69	534453038	534453106	1.92e-26
sil_1091303	5	CM009797.1	128	100000	69	0	0	1	69	535483801	535483733	4.12e-28	231
SNP_1077102	5	CM009797.1	128	100000	69	0	0	1	69	536188602	536188670	1.92e-26	232
sil_982130	5	CM009797.1	117	97101	69	2	0	1	69	536203878	536203946	1.92e-26	233
sil_1110787	5	CM009797.1	128	100000	69	0	0	1	69	538665745	538665677	1.15e-23	234
sil_4997740	5	CM009797.1	128	100000	69	0	0	1	69	539778579	539778511	1.92e-26	236
SNP_2247444	5	CM009797.1	128	100000	69	0	0	1	69	540899951	540899883	8.92e-25	240
sil_1072802	5	CM009797.1	128	100000	69	0	0	1	69	540937078	540937146	8.92e-25	241
SNP_990091	5	CM009797.1	122	98551	69	1	0	1	69	541630466	541630398	8.92e-25	243
sil_4996906	5	CM009797.1	122	98551	69	1	0	1	69	543523842	543523774	4.12e-28	246
SNP_100007414	5	CM009797.1	122	100000	66	0	0	4	69	545868656	545868591	8.92e-25	245
SNP_1297580	5	CM009797.1	128	100000	69	0	0	1	69	547508048	547507980	4.12e-28
sil_4999112	5	CM009797.1	128	100000	69	0	0	1	69	549589889	549589821	3.21e-24	247
sil_1208613	5	CM009797.1	128	100000	69	0	0	1	69	551678606	551678674	8.92e-25	248
sil_3570463	5	CM009797.1	117	97101	69	2	0	1	69	554943026	554943094	4.12e-28
SNP_1216419	5	CM009797.1	122	98551	69	1	0	1	69	555937894	555937962	1.92e-26	250
sil_3572886	5	CM009797.1	117	97101	69	2	0	1	69	559200188	559200256	8.92e-25
SNP_100019180	5	CM009797.1	117	97101	69	2	0	1	69	559814160	559814228	8.92e-25	253
sil_1099467	5	CM009797.1	128	100000	69	0	0	1	69	561478481	561478413	4.12e-28	254
sil_5005941	5	CM009797.1	113	97015	67	2	0	1	67	565278502	565278568	3.21e-24
sil_5006717	5	CM009797.1	128	100000	69	0	0	1	69	568419030	568419098	8.92e-25	258
sil_1079092	5	CM009797.1	122	100000	66	0	0	1	66	570118077	570118142	5.33e-27
SNP_3572030	5	CM009797.1	115	97101	69	1	1	1	69	571038175	571038242	8.92e-25	260
SNP_100001863	5	CM009797.1	117	97101	69	2	0	1	69	571039884	571039816	1.92e-26
sil_1031271	5	CM009797.1	122	98551	69	1	0	1	69	575649761	575649829	4.12e-28	265
sil_4993924	5	CM009797.1	122	98551	69	1	0	1	69	580992311	580992379	8.92e-25	274
SNP_1091827	5	CM009797.1	115	97101	69	0	2	1	69	582414472	582414406	6.90e-26
sil_5001923	5	CM009797.1	128	100000	69	0	0	1	69	586746405	586746337	6.90e-26	276
SNP_1201035	5	CM009797.1	122	100000	66	0	0	1	66	587866158	587866223	1.92e-26
SNP_1218447	5	CM009797.1	128	100000	69	0	0	1	69	592607873	592607941	4.12e-28	278
sil_5007083	5	CM009797.1	122	98551	69	1	0	1	69	602521192	602521260	8.92e-25
sil_3571152	5	CM009797.1	121	98529	68	1	0	1	68	604199340	604199273	3.21e-24
SNP_2258868	5	CM009797.1	128	100000	69	0	0	1	69	604489128	604489196	1.92e-26	280
sil_2276308	5	CM009797.1	128	100000	69	0	0	1	69	606514303	606514371	3.21e-24	283
sil_2275695	5	CM009797.1	128	100000	69	0	0	1	69	606775572	606775504	8.92e-25	281
sil_995322	5	CM009797.1	128	100000	69	0	0	1	69	606847687	606847755	8.92e-25	282
sil_2289208	5	CM009797.1	128	100000	69	0	0	1	69	608489861	608489929	1.15e-23	284
sil_3572105	5	CM009797.1	128	100000	69	0	0	1	69	608512726	608512794	3.21e-24
sil_3571879	5	CM009797.1	113	97015	67	2	0	1	67	611713544	611713610	3.21e-24
sil_2276870	5	CM009797.1	128	100000	69	0	0	1	69	611985181	611985113	1.92e-26	285
sil_1392364	5	CM009797.1	122	98551	69	1	0	1	69	612077379	612077447	4.12e-28
sil_4995773	5	CM009797.1	122	98551	69	1	0	1	69	615051031	615050963	3.21e-24	289
sil_1127879	5	CM009797.1	128	100000	69	0	0	1	69	615178893	615178961	2.48e-25	290
sil_3959928	5	CM009797.1	128	100000	69	0	0	1	69	615179775	615179843	1.92e-26	291
sil_2269391	5	CM009797.1	122	98551	69	1	0	1	69	620105703	620105771	8.92e-25	294
SNP_1098619	5	CM009797.1	128	100000	69	0	0	1	69	620472828	620472760	1.92e-26	295
SNP_1059801	5	CM009797.1	122	98551	69	1	0	1	69	620475001	620475069	1.15e-23	296
SNP_1215556	5	CM009797.1	122	98551	69	1	0	1	69	620922686	620922618	1.92e-26
SNP_1025773	5	CM009797.1	122	98551	69	1	0	1	69	621716882	621716950	1.48e-27	297
sil_2247447	5	CM009797.1	128	100000	69	0	0	1	69	621941737	621941805	1.92e-26	298
sil_4994944	5	CM009797.1	128	100000	69	0	0	1	69	628235028	628235096	6.90e-26	300
sil_1112114	5	CM009797.1	128	100000	69	0	0	1	69	629014707	629014639	1.92e-26	302
sil_1106001	5	CM009797.1	128	100000	69	0	0	1	69	633210198	633210266	1.92e-26	303
sil_5003184	5	CM009797.1	122	98551	69	1	0	1	69	634869861	634869929	4.12e-28	306
sil_5007269	5	CM009797.1	122	98551	69	1	0	1	69	634869861	634869929	1.48e-27	307
sil_1213432	5	CM009797.1	128	100000	69	0	0	1	69	635051115	635051183	8.92e-25	308
SNP_100002604	5	CM009797.1	126	100000	68	0	0	2	69	636149743	636149810	6.90e-26	309
SNP_1208156	5	CM009797.1	128	100000	69	0	0	1	69	637021867	637021935	1.15e-23	310
SNP_100005356	5	CM009797.1	128	100000	69	0	0	1	69	639035482	639035550	6.90e-26
sil_978882	5	CM009797.1	128	100000	69	0	0	1	69	640505008	640504940	1.92e-26	315
SNP_1189263	5	CM009797.1	128	100000	69	0	0	1	69	642248786	642248718	8.92e-25	321
sil_2252001	5	CM009797.1	128	100000	69	0	0	1	69	642622665	642622733	8.92e-25	318
sil_983378	5	CM009797.1	128	100000	69	0	0	1	69	642627825	642627893	4.15e-23	319
sil_999526	5	CM009797.1	122	98551	69	1	0	1	69	642726378	642726446	1.92e-26	320
SNP_100028808	5	CM009797.1	113	97015	67	2	0	1	67	643550777	643550711	6.90e-26
sil_1071896	5	CM009797.1	128	100000	69	0	0	1	69	644088206	644088274	3.21e-24	311
SNP_1063952	5	CM009797.1	128	100000	69	0	0	1	69	646381927	646381995	3.21e-24	324
SNP_1015952	5	CM009797.1	128	100000	69	0	0	1	69	647569232	647569300	5.33e-27	323
SNP_1219555	5	CM009797.1	128	100000	69	0	0	1	69	653022092	653022160	8.92e-25	326
sil_1353249	5	CM009797.1	122	98551	69	1	0	1	69	654271712	654271780	1.15e-23
SNP_1111856	5	CM009797.1	128	100000	69	0	0	1	69	654738505	654738437	2.48e-25	329
SNP_1139898	5	CM009797.1	122	98551	69	1	0	1	69	655256922	655256990	4.12e-28
SNP_1233988	5	CM009797.1	128	100000	69	0	0	1	69	655819996	655820064	8.92e-25	331
SNP_1116239	5	CM009797.1	128	100000	69	0	0	1	69	656046236	656046168	8.92e-25	332
sil_2258035	5	CM009797.1	122	98551	69	1	0	1	69	656593210	656593278	3.21e-24	333
SNP_1126999	5	CM009797.1	128	100000	69	0	0	1	69	656998005	656998073	1.15e-23	339
sil_4009833	5	CM009797.1	128	100000	69	0	0	1	69	657853194	657853262	3.21e-24	335
SNP_1229306	5	CM009797.1	128	100000	69	0	0	1	69	657975125	657975193	8.92e-25	336
sil_1156906	5	CM009797.1	128	100000	69	0	0	1	69	658377345	658377277	4.12e-28	334
sil_4996952	5	CM009797.1	121	98551	69	0	1	1	69	659979093	659979026	4.15e-23	341
sil_1079093	5	CM009797.1	115	97059	68	2	0	1	68	661363828	661363895	4.12e-28
sil_1003681	6	CM009798.1	117	97101	69	2	0	1	69	1107328	1107260	1.92e-26
sil_1258425	6	CM009798.1	128	100000	69	0	0	1	69	1108036	1108104	1.15e-23
sil_5006940	6	CM009798.1	117	97101	69	2	0	1	69	1187785	1187853	3.21e-24	11
sil_5010327	6	CM009798.1	115	97059	68	2	0	1	68	2336889	2336822	2.48e-25	1
SNP_995648	6	CM009798.1	128	100000	69	0	0	1	69	2368579	2368647	1.92e-26	2
SNP_1016516	6	CM009798.1	128	100000	69	0	0	1	69	2370623	2370555	1.92e-26	3
sil_1722601	6	CM009798.1	128	100000	69	0	0	1	69	2783001	2783069	6.90e-26	4
sil_2265444	6	CM009798.1	128	100000	69	0	0	1	69	2783785	2783853	8.92e-25	5
sil_1152962	6	CM009798.1	122	98551	69	1	0	1	69	2783975	2783907	1.92e-26	6
sil_1694858	6	CM009798.1	119	98507	67	1	0	3	69	3833607	3833541	6.90e-26	9
sil_1133160	6	CM009798.1	122	98551	69	1	0	1	69	3834749	3834817	1.92e-26	10
sil_5002032	6	CM009798.1	122	100000	66	0	0	4	69	4548238	4548173	3.21e-24
sil_5004263	6	CM009798.1	117	97101	69	2	0	1	69	4551075	4551143	8.92e-25
sil_1388018	6	CM009798.1	121	98551	69	0	1	1	69	5187102	5187169	8.92e-25
sil_1025731	6	CM009798.1	128	100000	69	0	0	1	69	5244281	5244349	2.48e-25	12
sil_1108287	6	CM009798.1	128	100000	69	0	0	1	69	6482442	6482374	1.92e-26	14
sil_2249815	6	CM009798.1	117	97101	69	2	0	1	69	6528390	6528458	3.21e-24
sil_1084018	6	CM009798.1	122	98551	69	1	0	1	69	7144202	7144270	4.12e-28
sil_1725888	6	CM009798.1	128	100000	69	0	0	1	69	7660634	7660566	1.92e-26
SNP_2260971	6	CM009798.1	122	98551	69	1	0	1	69	7689745	7689677	4.12e-28	19
sil_3935624	6	CM009798.1	117	97101	69	2	0	1	69	8153850	8153918	5.33e-27	21
sil_3945522	6	CM009798.1	117	97101	69	2	0	1	69	8153850	8153918	1.48e-27	22
sil_3573922	6	CM009798.1	113	97059	68	1	1	3	69	9842329	9842262	1.48e-27	27
sil_3950912	6	CM009798.1	121	98529	68	1	0	1	68	10203000	10202933	4.12e-28	26
sil_1363307	6	CM009798.1	122	98551	69	1	0	1	69	11028400	11028468	8.92e-25	29
sil_1144727	6	CM009798.1	121	98529	68	1	0	2	69	12090453	12090520	1.92e-26	32
sil_1132002	6	CM009798.1	115	97101	69	1	1	1	69	12256470	12256403	1.92e-26	34
sil_2260040	6	CM009798.1	122	98551	69	1	0	1	69	12995613	12995545	1.15e-23	36
sil_1091666	6	CM009798.1	122	98551	69	1	0	1	69	13023293	13023361	1.92e-26	37
SNP_1116139	6	CM009798.1	128	100000	69	0	0	1	69	13532663	13532595	4.12e-28	40
sil_4996396	6	CM009798.1	128	100000	69	0	0	1	69	13537015	13537083	4.12e-28
sil_1160298	6	CM009798.1	111	97015	67	1	1	1	67	13798891	13798826	4.12e-28
sil_1860260	6	CM009798.1	122	98551	69	1	0	1	69	14484654	14484586	8.92e-25	51
sil_2261008	6	CM009798.1	122	98551	69	1	0	1	69	14632457	14632525	4.12e-28	53
sil_1204226	6	CM009798.1	121	98529	68	1	0	1	68	15192468	15192535	1.92e-26	50
sil_1670439	6	CM009798.1	119	98507	67	1	0	3	69	15645196	15645130	6.90e-26
sil_3026051	6	CM009798.1	122	98551	69	1	0	1	69	15941184	15941116	4.12e-28	65
SNP_1229601	6	CM009798.1	122	98551	69	1	0	1	69	16846912	16846980	4.12e-28	70
sil_1197431	6	CM009798.1	124	100000	67	0	0	1	67	17000514	17000580	4.12e-28	72
SNP_1188124	6	CM009798.1	117	97101	69	2	0	1	69	17080080	17080148	5.33e-27	73
SNP_1098689	6	CM009798.1	128	100000	69	0	0	1	69	17966110	17966178	4.12e-28	71
sil_1132843	6	CM009798.1	126	100000	68	0	0	2	69	20534540	20534607	1.92e-26	88
sil_1296123	6	CM009798.1	115	97059	68	2	0	1	68	22874145	22874078	4.12e-28	90
sil_1254927	6	CM009798.1	117	97101	69	2	0	1	69	23198410	23198478	4.12e-28
sil_990627	6	CM009798.1	122	98551	69	1	0	1	69	23198410	23198478	5.33e-27
sil_978691	6	CM009798.1	126	100000	68	0	0	1	68	23203074	23203141	4.12e-28	64
sil_1056051	6	CM009798.1	128	100000	69	0	0	1	69	25263707	25263775	1.92e-26	66
sil_5004575	6	CM009798.1	117	97101	69	2	0	1	69	25270919	25270851	1.48e-27
sil_5001192	6	CM009798.1	117	97101	69	2	0	1	69	28253907	28253839	4.12e-28
sil_5007032	6	CM009798.1	121	98529	68	1	0	2	69	28284197	28284264	4.12e-28
sil_2264218	6	CM009798.1	128	100000	69	0	0	1	69	31156502	31156570	4.12e-28
sil_1363793	6	CM009798.1	128	100000	69	0	0	1	69	31156505	31156437	1.92e-26
sil_1127539	6	CM009798.1	122	98551	69	1	0	1	69	31291081	31291149	4.12e-28
sil_1021322	6	CM009798.1	117	97101	69	2	0	1	69	32517869	32517937	1.92e-26	95
sil_1091853	6	CM009798.1	128	100000	69	0	0	1	69	32517872	32517804	1.92e-26	96
sil_4999197	6	CM009798.1	117	97101	69	2	0	1	69	33685442	33685374	1.92e-26
sil_1103499	6	CM009798.1	128	100000	69	0	0	1	69	45870812	45870744	1.92e-26	106
sil_4997711	6	CM009798.1	121	98529	68	1	0	1	68	46847730	46847663	1.92e-26	108
sil_1104964	6	CM009798.1	128	100000	69	0	0	1	69	47023506	47023438	1.92e-26	109
sil_1865074	6	CM009798.1	113	97015	67	2	0	3	69	47112190	47112256	1.92e-26
SNP_100004116	6	CM009798.1	128	100000	69	0	0	1	69	47394737	47394805	1.92e-26	110
sil_987254	6	CM009798.1	128	100000	69	0	0	1	69	47394828	47394896	1.92e-26	111
sil_1001587	6	CM009798.1	122	98551	69	1	0	1	69	47516239	47516307	4.12e-28	114
sil_1156253	6	CM009798.1	128	100000	69	0	0	1	69	47893010	47893078	4.12e-28	112
SNP_100023659	6	CM009798.1	117	97101	69	2	0	1	69	63516990	63516922	1.92e-26
sil_5009011	6	CM009798.1	117	97101	69	2	0	1	69	65429490	65429558	8.92e-25
SNP_1194474	6	CM009798.1	128	100000	69	0	0	1	69	69582225	69582157	1.48e-27	117
SNP_1106874	6	CM009798.1	128	100000	69	0	0	1	69	69627543	69627611	1.92e-26	118
SNP_1228642	6	CM009798.1	121	98551	69	0	1	1	69	70149766	70149833	1.92e-26	119
SNP_100003325	6	CM009798.1	122	98551	69	1	0	1	69	73786886	73786818	1.92e-26
sil_1056946	6	CM009798.1	115	97059	68	2	0	1	68	80554564	80554497	4.12e-28	121
sil_1065650	6	CM009798.1	128	100000	69	0	0	1	69	85118450	85118382	4.12e-28	126
sil_4997147	6	CM009798.1	117	97101	69	2	0	1	69	85449613	85449545	4.12e-28
sil_5010514	6	CM009798.1	121	98529	68	1	0	2	69	85837460	85837393	1.92e-26	124
SNP_100017297	6	CM009798.1	117	97101	69	2	0	1	69	87502777	87502709	1.92e-26	122
sil_1045618	6	CM009798.1	128	100000	69	0	0	1	69	88439137	88439069	4.12e-28	123
sil_1097706	6	CM009798.1	128	100000	69	0	0	1	69	90831813	90831745	4.12e-28	128
sil_1862824	6	CM009798.1	122	98551	69	1	0	1	69	91226915	91226847	1.92e-26	127
sil_1124515	6	CM009798.1	128	100000	69	0	0	1	69	92741854	92741786	1.48e-27	130
sil_4999621	6	CM009798.1	126	100000	68	0	0	1	68	94110832	94110899	8.92e-25	132
sil_1143366	6	CM009798.1	117	97101	69	2	0	1	69	95906470	95906402	1.92e-26	133
SNP_1090311	6	CM009798.1	117	98485	66	1	0	1	66	95906853	95906918	8.92e-25
sil_1001920	6	CM009798.1	122	100000	66	0	0	1	66	96385940	96385875	4.12e-28
sil_5002488	6	CM009798.1	122	98551	69	1	0	1	69	96485592	96485660	1.92e-26
sil_4996521	6	CM009798.1	117	97101	69	2	0	1	69	96485595	96485527	1.92e-26	137
sil_1059926	6	CM009798.1	128	100000	69	0	0	1	69	97281753	97281821	1.92e-26	138
SNP_100020976	6	CM009798.1	128	100000	69	0	0	1	69	99299853	99299785	8.92e-25	139
SNP_100015587	6	CM009798.1	115	97059	68	2	0	2	69	99300685	99300752	1.48e-27	140
SNP_100005603	6	CM009798.1	117	97101	69	2	0	1	69	99301485	99301553	8.92e-25	141
sil_1220449	6	CM009798.1	128	100000	69	0	0	1	69	103006289	103006221	8.92e-25	142
SNP_100027205	6	CM009798.1	126	100000	68	0	0	1	68	125185609	125185542	1.92e-26	144
sil_5007314	6	CM009798.1	117	98485	66	1	0	4	69	127484309	127484244	1.92e-26	145
sil_1235690	6	CM009798.1	122	100000	66	0	0	1	66	144139219	144139284	3.21e-24
SNP_1048579	6	CM009798.1	128	100000	69	0	0	1	69	144207039	144207107	2.48e-25	146
sil_1045582	6	CM009798.1	128	100000	69	0	0	1	69	145578986	145578918	8.92e-25	147
sil_2254698	6	CM009798.1	122	98551	69	1	0	1	69	149934689	149934757	6.90e-26	151
sil_2253795	6	CM009798.1	122	98551	69	1	0	1	69	162111996	162111928	3.21e-24
sil_1041496	6	CM009798.1	128	100000	69	0	0	1	69	163080157	163080225	8.92e-25	153
sil_5003816	6	CM009798.1	113	97015	67	2	0	1	67	165512914	165512980	8.92e-25
sil_1089237	6	CM009798.1	128	100000	69	0	0	1	69	171656614	171656546	4.12e-28	155
sil_5009798	6	CM009798.1	115	97059	68	2	0	1	68	173126588	173126521	4.12e-28	156
SNP_1125214	6	CM009798.1	128	100000	69	0	0	1	69	181299578	181299646	1.92e-26	157
sil_2275883	6	CM009798.1	128	100000	69	0	0	1	69	181670428	181670360	1.92e-26	160
SNP_1103398	6	CM009798.1	128	100000	69	0	0	1	69	183191274	183191342	2.48e-25	161
sil_5007764	6	CM009798.1	113	97015	67	2	0	3	69	187839951	187840017	3.21e-24
SNP_2293773	6	CM009798.1	128	100000	69	0	0	1	69	192137332	192137400	8.92e-25	159
sil_1764545	6	CM009798.1	128	100000	69	0	0	1	69	200725578	200725510	8.92e-25	158
sil_4999766	6	CM009798.1	122	98551	69	1	0	1	69	206422540	206422472	2.48e-25
sil_5007754	6	CM009798.1	117	97101	69	2	0	1	69	213416123	213416191	1.92e-26	173
sil_5004766	6	CM009798.1	113	97015	67	2	0	3	69	215892021	215892087	4.12e-28
sil_3573276	6	CM009798.1	117	97101	69	2	0	1	69	230386530	230386462	1.92e-26	168
sil_3571064	6	CM009798.1	122	98551	69	1	0	1	69	233616535	233616467	1.92e-26	179
sil_3572498	6	CM009798.1	117	97101	69	2	0	1	69	242811915	242811983	8.92e-25	178
sil_1093523	6	CM009798.1	128	100000	69	0	0	1	69	250464272	250464204	4.12e-28	165
sil_3572471	6	CM009798.1	122	98551	69	1	0	1	69	259245540	259245472	1.48e-27	175
SNP_100005063	6	CM009798.1	128	100000	69	0	0	1	69	266138755	266138823	8.92e-25	163
sil_1697218	6	CM009798.1	122	98551	69	1	0	1	69	267175571	267175639	1.92e-26	164
SNP_1109699	6	CM009798.1	128	100000	69	0	0	1	69	274731070	274731002	4.12e-28	181
SNP_1861102	6	CM009798.1	128	100000	69	0	0	1	69	275571917	275571849	8.92e-25	182
sil_3571588	6	CM009798.1	122	98551	69	1	0	1	69	276425050	276425118	8.92e-25
sil_4999464	6	CM009798.1	128	100000	69	0	0	1	69	290182221	290182289	1.92e-26	183
SNP_100009845	6	CM009798.1	122	98551	69	1	0	1	69	299775252	299775184	8.92e-25
SNP_100007691	6	CM009798.1	117	97101	69	2	0	1	69	308374296	308374228	4.12e-28	162
sil_1714116	6	CM009798.1	122	100000	66	0	0	1	66	313933337	313933402	4.12e-28
SNP_100004015	6	CM009798.1	128	100000	69	0	0	1	69	336709349	336709281	3.21e-24
sil_1062027	6	CM009798.1	128	100000	69	0	0	1	69	341162961	341162893	8.92e-25
SNP_100004302	6	CM009798.1	122	98551	69	1	0	1	69	341344223	341344155	8.92e-25	172
sil_1863360	6	CM009798.1	122	98551	69	1	0	1	69	349253487	349253555	1.92e-26	176
sil_4997759	6	CM009798.1	117	97101	69	2	0	1	69	378997394	378997462	8.92e-25
sil_5004608	6	CM009798.1	117	97101	69	2	0	1	69	395340075	395340007	1.48e-27
SNP_100004922	6	CM009798.1	117	97101	69	2	0	1	69	410324190	410324122	8.92e-25	187
sil_1007368	6	CM009798.1	122	98551	69	1	0	1	69	430485958	430485890	8.92e-25	188
SNP_1202253	6	CM009798.1	128	100000	69	0	0	1	69	439145746	439145814	4.12e-28	189
sil_4998715	6	CM009798.1	113	97015	67	2	0	3	69	446026272	446026206	8.92e-25
SNP_2260657	6	CM009798.1	121	98551	69	0	1	1	69	469303289	469303222	8.92e-25	193
sil_1080814	6	CM009798.1	121	98529	68	1	0	1	68	476151548	476151481	1.15e-23	194
sil_2276577	6	CM009798.1	128	100000	69	0	0	1	69	489542883	489542951	1.92e-26	195
SNP_1216013	6	CM009798.1	128	100000	69	0	0	1	69	490039004	490038936	3.21e-24	196
SNP_1156192	6	CM009798.1	128	100000	69	0	0	1	69	490148764	490148832	1.92e-26	197
sil_1096506	6	CM009798.1	122	98551	69	1	0	1	69	494988401	494988333	1.92e-26	198
sil_1032104	6	CM009798.1	128	100000	69	0	0	1	69	507395266	507395198	1.92e-26	199
sil_3575488	6	CM009798.1	113	97015	67	2	0	1	67	514390720	514390786	1.48e-27
SNP_1071268	6	CM009798.1	128	100000	69	0	0	1	69	514465674	514465606	8.92e-25	200
SNP_100016943	6	CM009798.1	117	97101	69	2	0	1	69	516518521	516518589	1.92e-26	202
SNP_1054186	6	CM009798.1	128	100000	69	0	0	1	69	518852807	518852875	3.21e-24	204
sil_5003571	6	CM009798.1	128	100000	69	0	0	1	69	519699087	519699019	8.92e-25	205
sil_2275593	6	CM009798.1	128	100000	69	0	0	1	69	523322214	523322282	8.92e-25
sil_1207638	6	CM009798.1	128	100000	69	0	0	1	69	523389974	523390042	1.92e-26	208
sil_5004003	6	CM009798.1	115	97101	69	0	1	1	69	523389974	523390040	8.92e-25	209
sil_1254023	6	CM009798.1	117	97101	69	2	0	1	69	523399676	523399608	1.15e-23	207
SNP_100015574	6	CM009798.1	113	97015	67	2	0	1	67	523401556	523401490	3.21e-24
sil_5009217	6	CM009798.1	115	97059	68	2	0	2	69	531806753	531806820	8.92e-25	210
SNP_1146074	6	CM009798.1	128	100000	69	0	0	1	69	537508854	537508922	4.12e-28	213
sil_4996231	6	CM009798.1	117	97101	69	2	0	1	69	537536223	537536155	8.92e-25
sil_1172380	6	CM009798.1	128	100000	69	0	0	1	69	538539348	538539416	8.92e-25	214
sil_4995687	6	CM009798.1	117	97101	69	2	0	1	69	538710099	538710167	8.92e-25
SNP_3574626	6	CM009798.1	117	97101	69	2	0	1	69	540186005	540185937	1.92e-26
sil_3570268	6	CM009798.1	128	100000	69	0	0	1	69	540207713	540207781	8.92e-25
sil_5006150	6	CM009798.1	128	100000	69	0	0	1	69	540870375	540870443	4.12e-28
SNP_1210640	6	CM009798.1	128	100000	69	0	0	1	69	540961599	540961531	4.12e-28	217
sil_3572419	6	CM009798.1	122	98551	69	1	0	1	69	541075884	541075952	4.12e-28	218
sil_3572989	6	CM009798.1	117	97101	69	2	0	1	69	541652706	541652774	8.92e-25	220
sil_5002531	6	CM009798.1	122	98551	69	1	0	1	69	542049160	542049092	4.12e-28
SNP_2276045	6	CM009798.1	128	100000	69	0	0	1	69	545849763	545849831	4.12e-28	224
SNP_1151970	6	CM009798.1	128	100000	69	0	0	1	69	546814932	546814864	8.92e-25	225
sil_4998905	6	CM009798.1	117	98485	66	1	0	4	69	548201241	548201176	8.92e-25
sil_3571274	6	CM009798.1	121	98551	69	0	1	1	68	548586522	548586454	8.92e-25	229
SNP_100008238	6	CM009798.1	117	97101	69	2	0	1	69	548904175	548904107	8.92e-25	230
SNP_1088712	6	CM009798.1	128	100000	69	0	0	1	69	549329689	549329757	1.48e-27	231
sil_3573064	6	CM009798.1	117	97101	69	2	0	1	69	549389920	549389852	8.92e-25	232
sil_3573166	6	CM009798.1	128	100000	69	0	0	1	69	549451954	549451886	1.15e-23
SNP_3574763	6	CM009798.1	113	97015	67	2	0	1	67	550600698	550600764	8.92e-25
SNP_1314444	6	CM009798.1	113	97015	67	2	0	1	67	551992605	551992671	8.92e-25
SNP_2256073	6	CM009798.1	128	100000	69	0	0	1	69	552827782	552827714	8.92e-25	239
SNP_100006522	6	CM009798.1	117	97101	69	2	0	1	69	555377884	555377952	8.92e-25
sil_2293463	6	CM009798.1	128	100000	69	0	0	1	69	556428257	556428325	4.12e-28	244
sil_1212462	6	CM009798.1	122	98551	69	1	0	1	69	556428260	556428192	8.92e-25	243
sil_1238407	6	CM009798.1	122	100000	66	0	0	1	66	556852165	556852100	8.92e-25	247
sil_1278415	6	CM009798.1	124	100000	67	0	0	3	69	557150451	557150517	6.90e-26	248
sil_1208362	6	CM009798.1	128	100000	69	0	0	1	69	557347367	557347435	8.92e-25	249
sil_1103888	6	CM009798.1	128	100000	69	0	0	1	69	559188936	559189004	4.12e-28	253
SNP_1091284	6	CM009798.1	128	100000	69	0	0	1	69	559558662	559558594	4.12e-28	252
sil_1137974	6	CM009798.1	122	98551	69	1	0	1	69	559991539	559991607	4.12e-28	250
SNP_2251812	6	CM009798.1	128	100000	69	0	0	1	69	561408559	561408627	4.12e-28
sil_1281554	6	CM009798.1	117	97101	69	2	0	1	69	562001147	562001079	1.92e-26
sil_1273271	6	CM009798.1	128	100000	69	0	0	1	69	563244085	563244153	4.12e-28	256
sil_1100599	6	CM009798.1	122	98551	69	1	0	1	69	563446986	563446918	4.12e-28	257
SNP_100017576	6	CM009798.1	128	100000	69	0	0	1	69	563847477	563847409	5.33e-27	258
sil_1041557	6	CM009798.1	121	98529	68	1	0	1	68	564857114	564857181	4.12e-28	260
sil_1124675	6	CM009798.1	122	98551	69	1	0	1	69	564858780	564858712	4.12e-28	259
sil_1045796	6	CM009798.1	117	97101	69	2	0	1	69	565711895	565711963	4.12e-28
SNP_4262058	6	CM009798.1	126	100000	68	0	0	1	68	566473500	566473433	4.12e-28	273
sil_1162331	6	CM009798.1	128	100000	69	0	0	1	69	566656361	566656293	1.92e-26
sil_1125325	6	CM009798.1	117	97101	69	2	0	1	69	566916015	566916083	4.12e-28	284
sil_1299160	6	CM009798.1	122	100000	66	0	0	2	67	566916017	566915952	4.12e-28	285
sil_1111100	6	CM009798.1	128	100000	69	0	0	1	69	567738298	567738230	4.12e-28	263
SNP_1106558	6	CM009798.1	128	100000	69	0	0	1	69	568358908	568358840	4.12e-28	262
sil_2290108	6	CM009798.1	128	100000	69	0	0	1	69	568360491	568360423	4.12e-28
sil_1862957	6	CM009798.1	122	98551	69	1	0	1	69	568629191	568629259	2.48e-25	255
SNP_981052	6	CM009798.1	122	98551	69	1	0	1	69	570799556	570799624	4.12e-28	300
sil_5002845	6	CM009798.1	121	98551	69	0	1	1	69	570939192	570939259	4.12e-28
sil_1201385	6	CM009798.1	128	100000	69	0	0	1	69	571461164	571461232	4.12e-28
sil_1195570	6	CM009798.1	122	98551	69	1	0	1	69	571470878	571470810	4.12e-28
sil_1133018	6	CM009798.1	122	98551	69	1	0	1	69	572312108	572312040	1.92e-26
sil_1090210	6	CM009798.1	122	98551	69	1	0	1	69	574157085	574157153	4.12e-28
sil_1683634	6	CM009798.1	122	98551	69	1	0	1	69	574837098	574837166	4.12e-28	307
sil_1306745	6	CM009798.1	121	98529	68	1	0	1	68	575023466	575023533	1.92e-26
sil_3941546	6	CM009798.1	128	100000	69	0	0	1	69	575136478	575136410	4.12e-28	310
sil_1389521	7	CM009799.1	126	100000	68	0	0	2	69	2167067	2167134	1.92e-26
sil_1360007	7	CM009799.1	128	100000	69	0	0	1	69	2352914	2352846	1.92e-26	1
SNP_1387861	7	CM009799.1	122	100000	66	0	0	1	66	2888970	2889035	4.12e-28
sil_1371058	7	CM009799.1	128	100000	69	0	0	1	69	3032155	3032087	4.12e-28
sil_4998802	7	CM009799.1	122	98551	69	1	0	1	69	3975792	3975860	1.92e-26
sil_3575455	7	CM009799.1	121	98529	68	1	0	2	69	4288008	4287941	4.12e-28
sil_3575619	7	CM009799.1	122	100000	66	0	0	1	66	4503230	4503295	4.12e-28
sil_1333076	7	CM009799.1	122	98551	69	1	0	1	69	4503233	4503165	1.92e-26	8
SNP_1138131	7	CM009799.1	117	98485	66	1	0	1	66	4688071	4688136	4.12e-28	9
SNP_1220636	7	CM009799.1	128	100000	69	0	0	1	69	5453610	5453542	4.12e-28	10
sil_1116022	7	CM009799.1	122	100000	66	0	0	4	69	7768176	7768111	4.12e-28	19
sil_1257134	7	CM009799.1	124	100000	67	0	0	3	69	7768178	7768244	4.12e-28
sil_1066289	7	CM009799.1	117	97101	69	2	0	1	69	8795856	8795788	4.12e-28
sil_1081579	7	CM009799.1	128	100000	69	0	0	1	69	10160529	10160597	4.12e-28	20
sil_984165	7	CM009799.1	122	98551	69	1	0	1	69	10851296	10851228	6.90e-26
sil_4998196	7	CM009799.1	117	98485	66	1	0	1	66	11134002	11134067	4.12e-28
SNP_3574434	7	CM009799.1	117	97101	69	2	0	1	69	11182808	11182740	4.12e-28
SNP_100005836	7	CM009799.1	128	100000	69	0	0	1	69	12212228	12212296	4.12e-28	21
SNP_2256219	7	CM009799.1	128	100000	69	0	0	1	69	12232159	12232091	4.12e-28
sil_1111988	7	CM009799.1	128	100000	69	0	0	1	69	13376567	13376499	4.12e-28	27
sil_1862141	7	CM009799.1	115	97101	69	1	1	1	69	13936437	13936370	4.12e-28
SNP_1333948	7	CM009799.1	128	100000	69	0	0	1	69	14730887	14730955	4.12e-28	32
sil_1163079	7	CM009799.1	122	98551	69	1	0	1	69	14941334	14941266	2.48e-25
sil_1143181	7	CM009799.1	128	100000	69	0	0	1	69	16987067	16986999	4.12e-28	33
sil_3573217	7	CM009799.1	122	98551	69	1	0	1	69	17427281	17427349	4.12e-28
sil_1237038	7	CM009799.1	115	97101	69	1	1	1	69	19088289	19088222	4.12e-28	36
sil_1398318	7	CM009799.1	121	98551	69	0	1	1	69	19141525	19141592	4.12e-28	37
SNP_2282774	7	CM009799.1	122	98551	69	1	0	1	69	19638250	19638318	4.12e-28
sil_1164201	7	CM009799.1	121	98529	68	1	0	1	68	19772015	19772082	4.12e-28
sil_1367746	7	CM009799.1	122	98551	69	1	0	1	69	19772015	19772083	4.12e-28
SNP_2263800	7	CM009799.1	122	98551	69	1	0	1	69	20034443	20034375	4.12e-28	41
sil_1127215	7	CM009799.1	122	98551	69	1	0	1	69	20137265	20137197	4.12e-28	43
sil_1214356	7	CM009799.1	117	97101	69	2	0	1	69	20379010	20378942	4.12e-28
SNP_1119362	7	CM009799.1	128	100000	69	0	0	1	69	20443335	20443267	4.12e-28	39
sil_4996675	7	CM009799.1	122	98551	69	1	0	1	69	23475743	23475811	4.12e-28
sil_3936716	7	CM009799.1	122	98551	69	1	0	1	69	23737524	23737592	4.12e-28
sil_4999742	7	CM009799.1	117	97101	69	2	0	1	69	23994474	23994542	4.12e-28	45
SNP_1090490	7	CM009799.1	126	100000	68	0	0	1	68	24720517	24720584	4.12e-28	46
sil_1090134	7	CM009799.1	128	100000	69	0	0	1	69	25067275	25067207	4.12e-28	47
sil_1051802	7	CM009799.1	128	100000	69	0	0	1	69	27614388	27614320	4.12e-28	52
sil_5005687	7	CM009799.1	128	100000	69	0	0	1	69	28685525	28685457	4.12e-28	54
SNP_1006817	7	CM009799.1	128	100000	69	0	0	1	69	28685780	28685712	4.12e-28	53
sil_3573195	7	CM009799.1	119	98507	67	1	0	3	69	28914022	28913956	4.12e-28
sil_1106150	7	CM009799.1	128	100000	69	0	0	1	69	28947063	28947131	1.92e-26
SNP_1217716	7	CM009799.1	128	100000	69	0	0	1	69	29053690	29053622	8.92e-25	55
SNP_1127899	7	CM009799.1	128	100000	69	0	0	1	69	29423440	29423508	1.48e-27	59
sil_990823	7	CM009799.1	128	100000	69	0	0	1	69	29517224	29517292	4.12e-28	60
sil_5003048	7	CM009799.1	122	98551	69	1	0	1	69	30299869	30299801	4.12e-28
SNP_100012387	7	CM009799.1	122	98551	69	1	0	1	69	31412218	31412286	4.12e-28
sil_1046384	7	CM009799.1	128	100000	69	0	0	1	69	32246738	32246670	3.21e-24	63
sil_5003305	7	CM009799.1	115	97101	69	0	1	1	69	32246738	32246672	4.12e-28
sil_1050007	7	CM009799.1	117	97101	69	2	0	1	69	32649203	32649271	4.12e-28	64
sil_1119767	7	CM009799.1	128	100000	69	0	0	1	69	33229150	33229082	4.12e-28	65
SNP_3575161	7	CM009799.1	122	98551	69	1	0	1	69	33508130	33508062	1.48e-27
sil_1110470	7	CM009799.1	128	100000	69	0	0	1	69	33515849	33515781	4.12e-28
sil_3572617	7	CM009799.1	119	98507	67	1	0	3	69	33579552	33579618	4.12e-28
SNP_1074325	7	CM009799.1	128	100000	69	0	0	1	69	38683520	38683588	4.12e-28	68
sil_5010406	7	CM009799.1	122	98551	69	1	0	1	69	43736994	43736926	4.12e-28
SNP_1130296	7	CM009799.1	128	100000	69	0	0	1	69	44667986	44667918	4.12e-28	77
sil_1109265	7	CM009799.1	128	100000	69	0	0	1	69	46949899	46949831	4.12e-28	80
sil_1108608	7	CM009799.1	117	97101	69	2	0	1	69	51065478	51065410	4.12e-28	75
sil_4994204	7	CM009799.1	115	97059	68	2	0	1	68	55996534	55996601	4.12e-28
sil_980743	7	CM009799.1	113	97015	67	2	0	1	67	57299382	57299448	4.12e-28
SNP_1089996	7	CM009799.1	122	98551	69	1	0	1	69	58137705	58137637	4.12e-28	83
SNP_1217703	7	CM009799.1	128	100000	69	0	0	1	69	64153554	64153622	4.12e-28	85
sil_1192447	7	CM009799.1	128	100000	69	0	0	1	69	64273949	64274017	4.12e-28	86
SNP_1085123	7	CM009799.1	128	100000	69	0	0	1	69	64312581	64312513	4.12e-28	87
SNP_100009155	7	CM009799.1	117	97101	69	2	0	1	69	67464716	67464648	4.12e-28
SNP_1103958	7	CM009799.1	128	100000	69	0	0	1	69	69450542	69450474	4.12e-28	89
SNP_1179584	7	CM009799.1	128	100000	69	0	0	1	69	73988829	73988897	4.12e-28
sil_1218068	7	CM009799.1	128	100000	69	0	0	1	69	74025699	74025767	4.12e-28
SNP_100008485	7	CM009799.1	128	100000	69	0	0	1	69	77365973	77366041	4.12e-28	91
sil_3575751	7	CM009799.1	122	98551	69	1	0	1	69	79523052	79523120	4.12e-28	92
SNP_2252783	7	CM009799.1	128	100000	69	0	0	1	69	79523850	79523918	4.12e-28	93
SNP_1091684	7	CM009799.1	128	100000	69	0	0	1	69	83673451	83673519	4.12e-28	94
SNP_1204046	7	CM009799.1	128	100000	69	0	0	1	69	84425404	84425336	1.92e-26	95
sil_1058766	7	CM009799.1	128	100000	69	0	0	1	69	85666193	85666261	4.12e-28	98
SNP_100006129	7	CM009799.1	117	97101	69	2	0	1	69	86165332	86165264	4.12e-28	102
SNP_1372793	7	CM009799.1	128	100000	69	0	0	1	69	86355372	86355304	8.92e-25
SNP_3573440	7	CM009799.1	122	98551	69	1	0	1	69	86360726	86360794	4.12e-28	99
sil_4999588	7	CM009799.1	117	97101	69	2	0	1	69	86472027	86471959	4.12e-28
sil_5006991	7	CM009799.1	122	98551	69	1	0	1	69	86479777	86479845	1.92e-26
sil_1261462	7	CM009799.1	122	98551	69	1	0	1	69	86488555	86488487	4.12e-28	100
sil_1114034	7	CM009799.1	122	98551	69	1	0	1	69	86489137	86489069	4.12e-28	101
sil_1228396	7	CM009799.1	128	100000	69	0	0	1	69	89090732	89090664	4.12e-28	103
SNP_2241819	7	CM009799.1	128	100000	69	0	0	1	69	89992584	89992652	4.12e-28	104
sil_1065786	7	CM009799.1	128	100000	69	0	0	1	69	90806059	90805991	8.92e-25	105
sil_3961341	7	CM009799.1	117	97101	69	2	0	1	69	91380920	91380988	4.12e-28	96
SNP_2276000	7	CM009799.1	117	98507	67	0	1	1	67	93066535	93066600	4.12e-28
sil_4004904	7	CM009799.1	122	98551	69	1	0	1	69	93436743	93436811	4.12e-28	106
sil_5008332	7	CM009799.1	113	97015	67	2	0	3	69	94228077	94228011	8.92e-25
sil_2257165	7	CM009799.1	122	98551	69	1	0	1	69	94535959	94536027	4.12e-28	107
sil_5006583	7	CM009799.1	117	97101	69	2	0	1	69	95013798	95013730	1.92e-26
sil_3955570	7	CM009799.1	128	100000	69	0	0	1	69	95339370	95339302	4.12e-28
SNP_996971	7	CM009799.1	128	100000	69	0	0	1	69	96062937	96063005	4.12e-28	108
SNP_1247998	7	CM009799.1	128	100000	69	0	0	1	69	96828550	96828618	4.12e-28	109
SNP_2325759	7	CM009799.1	128	100000	69	0	0	1	69	98547406	98547338	4.12e-28	110
sil_5003764	7	CM009799.1	122	98551	69	1	0	1	69	102537841	102537909	4.12e-28
sil_1228667	7	CM009799.1	128	100000	69	0	0	1	69	105423492	105423424	4.12e-28	116
sil_1381088	7	CM009799.1	128	100000	69	0	0	1	69	105632900	105632968	4.12e-28
sil_1088535	7	CM009799.1	128	100000	69	0	0	1	69	105770865	105770797	1.92e-26	112
sil_1104020	7	CM009799.1	122	98551	69	1	0	1	69	105770998	105771066	4.12e-28	113
sil_1094971	7	CM009799.1	128	100000	69	0	0	1	69	105771001	105770933	4.12e-28	114
sil_3573635	7	CM009799.1	122	98551	69	1	0	1	69	105774479	105774547	4.12e-28	115
sil_5003271	7	CM009799.1	119	98507	67	1	0	3	69	107259212	107259146	8.92e-25
SNP_1096346	7	CM009799.1	128	100000	69	0	0	1	69	110717816	110717748	4.12e-28	124
SNP_1032143	7	CM009799.1	128	100000	69	0	0	1	69	111261156	111261224	8.92e-25	123
sil_5003498	7	CM009799.1	117	97101	69	2	0	1	69	111613111	111613179	4.12e-28	122
sil_5003846	7	CM009799.1	117	97101	69	2	0	1	69	113176103	113176171	1.92e-26
sil_1285725	7	CM009799.1	117	97101	69	2	0	1	69	114520449	114520517	4.12e-28	120
SNP_1138885	7	CM009799.1	128	100000	69	0	0	1	69	116529607	116529675	4.12e-28	125
sil_1763304	7	CM009799.1	117	97101	69	2	0	1	69	121991381	121991449	4.12e-28	129
SNP_1383520	7	CM009799.1	117	97101	69	2	0	1	69	125169611	125169543	4.12e-28
SNP_100005000	7	CM009799.1	117	97101	69	2	0	1	69	145863260	145863192	4.12e-28	130
sil_1023690	7	CM009799.1	121	98529	68	1	0	1	68	166210632	166210565	4.12e-28	133
sil_989967	7	CM009799.1	122	98551	69	1	0	1	69	170824958	170824890	4.12e-28	137
sil_1314848	7	CM009799.1	119	98507	67	1	0	1	67	171241738	171241672	4.12e-28
sil_3573825	7	CM009799.1	117	97101	69	2	0	1	69	172935980	172935912	1.92e-26
sil_1167274	7	CM009799.1	122	98551	69	1	0	1	69	174619282	174619350	4.12e-28	138
SNP_1061009	7	CM009799.1	128	100000	69	0	0	1	69	179983635	179983567	4.12e-28	134
sil_1027956	7	CM009799.1	128	100000	69	0	0	1	69	185475511	185475579	1.92e-26	140
sil_4996810	7	CM009799.1	117	98485	66	1	0	1	66	190879142	190879207	4.12e-28
sil_1407680	7	CM009799.1	117	97101	69	2	0	1	69	195463913	195463845	4.12e-28	142
sil_1057190	7	CM009799.1	122	98551	69	1	0	1	69	196511206	196511138	4.12e-28	143
sil_4999192	7	CM009799.1	121	98529	68	1	0	1	68	208114483	208114550	4.12e-28
sil_3574645	7	CM009799.1	128	100000	69	0	0	1	69	208114486	208114418	4.12e-28
sil_4997577	7	CM009799.1	117	97101	69	2	0	1	69	212992492	212992424	4.12e-28
sil_1115717	7	CM009799.1	128	100000	69	0	0	1	69	215067562	215067630	4.12e-28	144
sil_1128415	7	CM009799.1	126	100000	68	0	0	2	69	238824994	238825061	4.12e-28	146
sil_5010530	7	CM009799.1	115	97059	68	2	0	2	69	250165985	250165918	8.92e-25	147
sil_1408609	7	CM009799.1	121	98551	69	0	1	1	69	277817885	277817952	4.12e-28
sil_1019136	7	CM009799.1	117	97101	69	2	0	1	69	277817888	277817820	1.92e-26
sil_5007620	7	CM009799.1	115	97059	68	2	0	2	69	278379069	278379136	1.92e-26
sil_5008299	7	CM009799.1	117	97101	69	2	0	1	69	326366513	326366445	6.90e-26	158
sil_4999007	7	CM009799.1	117	97101	69	2	0	1	69	330255405	330255473	4.12e-28
sil_1408031	7	CM009799.1	121	98529	68	1	0	2	69	336582668	336582601	1.92e-26
sil_5004593	7	CM009799.1	128	100000	69	0	0	1	69	363292094	363292026	4.12e-28	156
sil_4996335	7	CM009799.1	122	98551	69	1	0	1	69	368352555	368352623	4.12e-28
sil_3573672	7	CM009799.1	117	98485	66	1	0	2	67	391512264	391512199	4.12e-28
sil_1107213	7	CM009799.1	117	97101	69	2	0	1	69	397843460	397843392	4.12e-28
sil_5008310	7	CM009799.1	121	98529	68	1	0	2	69	399814985	399815052	4.12e-28
sil_5005708	7	CM009799.1	122	98551	69	1	0	1	69	415607810	415607742	4.12e-28
sil_1051851	7	CM009799.1	128	100000	69	0	0	1	69	427927695	427927763	4.12e-28	153
SNP_1070325	7	CM009799.1	128	100000	69	0	0	1	69	440297266	440297198	4.12e-28	165
SNP_994514	7	CM009799.1	122	98551	69	1	0	1	69	460029337	460029405	4.12e-28	170
SNP_996521	7	CM009799.1	128	100000	69	0	0	1	69	462134934	462135002	8.92e-25	168
sil_1107171	7	CM009799.1	128	100000	69	0	0	1	69	483382154	483382222	4.12e-28	171
sil_980655	7	CM009799.1	122	98551	69	1	0	1	69	483385255	483385323	4.12e-28	172
sil_1861756	7	CM009799.1	122	100000	66	0	0	4	69	498725034	498724969	1.15e-23
SNP_100007387	7	CM009799.1	117	97101	69	2	0	1	69	500147231	500147299	8.92e-25
sil_2255021	7	CM009799.1	128	100000	69	0	0	1	69	500159958	500159890	1.92e-26	176
sil_4996349	7	CM009799.1	117	97101	69	2	0	1	69	508829970	508830038	4.12e-28	177
sil_3574068	7	CM009799.1	126	100000	68	0	0	2	69	523845165	523845232	4.12e-28
SNP_100011347	7	CM009799.1	122	98551	69	1	0	1	69	529768082	529768150	4.12e-28	181
sil_5005816	7	CM009799.1	128	100000	69	0	0	1	69	529774023	529774091	1.92e-26
SNP_100113575	7	CM009799.1	117	97101	69	2	0	1	69	530424112	530424180	4.12e-28	182
sil_2296776	7	CM009799.1	128	100000	69	0	0	1	69	533143218	533143150	4.12e-28	179
sil_1089918	7	CM009799.1	128	100000	69	0	0	1	69	534126677	534126745	4.12e-28	180
SNP_994119	7	CM009799.1	128	100000	69	0	0	1	69	538554742	538554810	8.92e-25	183
sil_1215377	7	CM009799.1	128	100000	69	0	0	1	69	539560346	539560278	1.92e-26	184
sil_2245356	7	CM009799.1	122	98551	69	1	0	1	69	543424929	543424861	4.12e-28	185
sil_1062974	7	CM009799.1	128	100000	69	0	0	1	69	549388669	549388737	4.12e-28	169
sil_3570841	7	CM009799.1	117	97101	69	2	0	1	69	553075258	553075326	1.92e-26
sil_1769152	7	CM009799.1	117	98485	66	1	0	1	66	556321272	556321337	5.33e-27
sil_3571248	7	CM009799.1	119	98507	67	1	0	3	69	557287159	557287093	4.12e-28
SNP_1145691	7	CM009799.1	128	100000	69	0	0	1	69	568208074	568208006	4.12e-28	193
sil_4998859	7	CM009799.1	117	97101	69	2	0	1	69	570811226	570811294	4.12e-28
sil_1409337	7	CM009799.1	117	97101	69	2	0	1	69	582491138	582491206	4.12e-28	197
sil_1407628	7	CM009799.1	122	98551	69	1	0	1	69	582491665	582491597	8.92e-25
sil_5006028	7	CM009799.1	117	98485	66	1	0	1	66	589899589	589899654	1.92e-26
SNP_2276002	7	CM009799.1	128	100000	69	0	0	1	69	590522127	590522195	4.12e-28	198
SNP_988105	7	CM009799.1	128	100000	69	0	0	1	69	592491793	592491725	4.12e-28	199
sil_2288387	7	CM009799.1	117	97101	69	2	0	1	69	593951698	593951766	4.12e-28	200
sil_2244521	7	CM009799.1	126	100000	68	0	0	2	69	599224560	599224493	8.92e-25	196
SNP_1063345	7	CM009799.1	128	100000	69	0	0	1	69	600901320	600901388	1.92e-26	203
SNP_1408043	7	CM009799.1	122	100000	66	0	0	4	69	601319457	601319392	4.12e-28	205
sil_2256628	7	CM009799.1	126	100000	68	0	0	1	68	606323926	606323859	6.90e-26	210
SNP_1019761	7	CM009799.1	128	100000	69	0	0	1	69	608064204	608064272	8.92e-25	211
sil_1014872	7	CM009799.1	122	98551	69	1	0	1	69	608066401	608066469	8.92e-25	212
SNP_1102445	7	CM009799.1	128	100000	69	0	0	1	69	608066664	608066596	1.48e-27	213
sil_1093120	7	CM009799.1	128	100000	69	0	0	1	69	609130967	609130899	4.12e-28
SNP_1314797	7	CM009799.1	117	97101	69	2	0	1	69	610266859	610266927	4.12e-28
sil_1112648	7	CM009799.1	128	100000	69	0	0	1	69	612385662	612385594	4.12e-28	215
sil_2278336	7	CM009799.1	128	100000	69	0	0	1	69	612387792	612387724	4.12e-28	216
sil_1076323	7	CM009799.1	122	98551	69	1	0	1	69	612399602	612399534	1.92e-26	217
sil_3938954	7	CM009799.1	119	98507	67	1	0	1	67	612650850	612650916	4.12e-28
sil_3960420	7	CM009799.1	117	97101	69	2	0	1	69	612650850	612650918	4.12e-28	219
SNP_1031592	7	CM009799.1	128	100000	69	0	0	1	69	613992915	613992847	4.12e-28	220
SNP_1096029	7	CM009799.1	128	100000	69	0	0	1	69	615033083	615033151	4.12e-28	223
SNP_1342225	7	CM009799.1	122	98551	69	1	0	1	69	615309682	615309614	4.12e-28	222
sil_4007921	7	CM009799.1	117	97101	69	2	0	1	69	616246172	616246240	4.12e-28	225
sil_3573556	7	CM009799.1	117	97101	69	2	0	1	69	617043520	617043588	4.12e-28
sil_5002135	7	CM009799.1	128	100000	69	0	0	1	69	617220005	617219937	4.12e-28
sil_5002539	7	CM009799.1	122	98551	69	1	0	1	69	617466034	617465966	4.12e-28	227
sil_4996885	7	CM009799.1	117	97101	69	2	0	1	69	619968328	619968396	4.12e-28
sil_1313511	7	CM009799.1	122	98551	69	1	0	1	69	619968514	619968582	4.12e-28	233
sil_1053933	7	CM009799.1	128	100000	69	0	0	1	69	621167499	621167431	4.12e-28	235
sil_1233015	7	CM009799.1	122	98551	69	1	0	1	69	624056884	624056952	4.12e-28	238
SNP_2275919	7	CM009799.1	128	100000	69	0	0	1	69	628400815	628400883	1.92e-26	240
sil_3571513	7	CM009799.1	117	97101	69	2	0	1	69	628807938	628808006	4.12e-28
sil_2302282	7	CM009799.1	128	100000	69	0	0	1	69	628967881	628967949	1.92e-26	241
sil_1074583	7	CM009799.1	122	98551	69	1	0	1	69	629012991	629012923	4.12e-28	242
SNP_1718109	7	CM009799.1	128	100000	69	0	0	1	69	631521054	631520986	6.90e-26	188
sil_1229949	7	CM009799.1	128	100000	69	0	0	1	69	632152928	632152996	1.92e-26	243
sil_3575580	7	CM009799.1	122	98551	69	1	0	1	69	636227583	636227515	1.92e-26	247
sil_2276366	7	CM009799.1	128	100000	69	0	0	1	69	638434471	638434539	4.12e-28	248
sil_1080417	7	CM009799.1	128	100000	69	0	0	1	69	639544601	639544669	3.21e-24	249
sil_1117708	7	CM009799.1	122	98551	69	1	0	1	69	645468173	645468105	4.12e-28
sil_4996557	7	CM009799.1	115	97059	68	2	0	1	68	645674940	645674873	8.92e-25	250
sil_3571982	7	CM009799.1	117	98485	66	1	0	4	69	645677772	645677707	4.12e-28	251
sil_3574514	7	CM009799.1	124	100000	67	0	0	1	67	646748595	646748529	4.12e-28
SNP_100007022	7	CM009799.1	115	97101	69	0	1	1	69	647881150	647881084	4.12e-28	253
sil_1217056	7	CM009799.1	128	100000	69	0	0	1	69	648680126	648680058	4.12e-28	252
sil_1220229	7	CM009799.1	117	97101	69	2	0	1	69	650148020	650148088	4.12e-28	257
SNP_2294851	7	CM009799.1	128	100000	69	0	0	1	69	650148023	650147955	4.12e-28	258
sil_1212061	7	CM009799.1	128	100000	69	0	0	1	69	650324563	650324631	4.12e-28	259
SNP_1315057	7	CM009799.1	122	98551	69	1	0	1	69	650972722	650972654	2.48e-25
sil_1021178	7	CM009799.1	122	98551	69	1	0	1	69	651092301	651092369	4.12e-28	260
sil_1017121	7	CM009799.1	126	100000	68	0	0	1	68	651726020	651725953	1.92e-26	261
SNP_1102333	7	CM009799.1	128	100000	69	0	0	1	69	651841379	651841447	4.12e-28	262
sil_1712901	7	CM009799.1	117	97101	69	2	0	1	69	653819559	653819627	4.12e-28
sil_1261774	7	CM009799.1	128	100000	69	0	0	1	69	653921935	653922003	1.92e-26	256
sil_1065050	7	CM009799.1	122	100000	66	0	0	1	66	657872498	657872433	4.12e-28
SNP_1011781	7	CM009799.1	128	100000	69	0	0	1	69	664744545	664744477	4.12e-28	268
SNP_3574573	7	CM009799.1	113	97015	67	2	0	3	69	665807847	665807913	4.12e-28
sil_1125065	7	CM009799.1	128	100000	69	0	0	1	69	669152367	669152435	1.92e-26
sil_5007584	7	CM009799.1	122	100000	66	0	0	4	69	669460571	669460506	4.12e-28
sil_4998776	7	CM009799.1	117	97101	69	2	0	1	69	670713649	670713717	4.12e-28	269
sil_2290628	7	CM009799.1	128	100000	69	0	0	1	69	673020868	673020936	4.12e-28	271
sil_2275208	7	CM009799.1	126	100000	68	0	0	1	68	673033825	673033758	4.12e-28	272
sil_5003905	7	CM009799.1	128	100000	69	0	0	1	69	673806029	673805961	4.12e-28
sil_1072102	7	CM009799.1	122	98551	69	1	0	1	69	673834047	673834115	4.12e-28	274
sil_3571114	7	CM009799.1	121	98551	69	0	1	1	69	674000316	674000249	4.12e-28
sil_1021039	7	CM009799.1	117	97101	69	2	0	1	69	674687986	674687918	1.48e-27	276
SNP_2292191	7	CM009799.1	128	100000	69	0	0	1	69	675714524	675714456	1.92e-26	278
sil_3570553	7	CM009799.1	122	100000	66	0	0	4	69	675972442	675972377	1.92e-26	279
sil_1379002	7	CM009799.1	117	97101	69	2	0	1	69	677102545	677102613	1.48e-27	285
sil_1127286	7	CM009799.1	122	98551	69	1	0	1	69	677118232	677118164	4.12e-28	286
sil_2289299	7	CM009799.1	128	100000	69	0	0	1	69	677406375	677406307	4.12e-28	281
SNP_1290835	7	CM009799.1	117	97101	69	2	0	1	69	677833349	677833417	4.12e-28	283
sil_4996956	7	CM009799.1	117	97101	69	2	0	1	69	678722558	678722490	4.12e-28	288
sil_1018112	7	CM009799.1	122	98551	69	1	0	1	69	678920845	678920777	4.12e-28	290
sil_1043093	7	CM009799.1	128	100000	69	0	0	1	69	679348813	679348881	4.12e-28	291
sil_1006216	7	CM009799.1	128	100000	69	0	0	1	69	679414373	679414305	4.12e-28	292
sil_1402869	7	CM009799.1	117	97101	69	2	0	1	69	679510770	679510838	4.12e-28
sil_1299124	7	CM009799.1	122	100000	66	0	0	4	69	679510986	679510921	5.33e-27
sil_3571046	7	CM009799.1	113	97059	68	0	1	4	69	679510986	679510919	4.12e-28
sil_3575528	7	CM009799.1	115	97101	69	1	1	1	69	679533924	679533857	4.12e-28
sil_1387829	7	CM009799.1	122	98551	69	1	0	1	69	679904476	679904408	8.92e-25
SNP_982747	7	CM009799.1	122	98551	69	1	0	1	69	681047194	681047126	3.21e-24
sil_1024978	7	CM009799.1	122	98551	69	1	0	1	69	681846356	681846288	1.92e-26	293
SNP_1073903	7	CM009799.1	119	98507	67	1	0	1	67	681846356	681846290	1.92e-26
sil_2250411	7	CM009799.1	122	98551	69	1	0	1	69	681847761	681847693	4.12e-28	294
sil_983201	7	CM009799.1	128	100000	69	0	0	1	69	683376591	683376659	5.33e-27
sil_991477	7	CM009799.1	128	100000	69	0	0	1	69	683817900	683817968	6.90e-26
sil_1101705	7	CM009799.1	128	100000	69	0	0	1	69	683818139	683818071	1.92e-26	296
sil_5010619	7	CM009799.1	122	98551	69	1	0	1	69	685142782	685142850	8.92e-25	299
SNP_996662	7	CM009799.1	128	100000	69	0	0	1	69	687345987	687346055	8.92e-25	301
sil_4999352	7	CM009799.1	128	100000	69	0	0	1	69	688778081	688778013	1.92e-26
SNP_100003820	7	CM009799.1	115	97101	69	1	1	1	69	691504063	691503996	3.21e-24	304
SNP_1389316	7	CM009799.1	128	100000	69	0	0	1	69	692092480	692092412	1.15e-23
sil_1268917	7	CM009799.1	122	98551	69	1	0	1	69	692873478	692873546	8.92e-25	317
sil_1252735	7	CM009799.1	121	98529	68	1	0	2	69	692996187	692996120	3.21e-24	312
SNP_4393797	7	CM009799.1	128	100000	69	0	0	1	69	693331320	693331252	1.15e-23	315
sil_2288416	7	CM009799.1	122	98551	69	1	0	1	69	693579192	693579124	1.92e-26	316
SNP_1009582	7	CM009799.1	128	100000	69	0	0	1	69	693744076	693744008	3.21e-24	321
SNP_1073345	7	CM009799.1	128	100000	69	0	0	1	69	694245242	694245310	3.21e-24	318
sil_2300339	7	CM009799.1	128	100000	69	0	0	1	69	694451104	694451036	8.92e-25	322
sil_1136190	7	CM009799.1	122	98551	69	1	0	1	69	694479073	694479005	8.92e-25
sil_987462	7	CM009799.1	122	98551	69	1	0	1	69	694706943	694706875	1.92e-26	323
SNP_987192	7	CM009799.1	128	100000	69	0	0	1	69	695036523	695036591	2.48e-25	324
sil_986638	7	CM009799.1	128	100000	69	0	0	1	69	696069203	696069135	1.92e-26	327
sil_4995372	7	CM009799.1	122	98551	69	1	0	1	69	696243996	696244064	4.12e-28
sil_4994127	7	CM009799.1	117	97101	69	2	0	1	69	697320362	697320430	4.12e-28
sil_4996126	7	CM009799.1	117	98485	66	1	0	1	66	697388863	697388928	4.12e-28
sil_4998407	7	CM009799.1	117	98485	66	1	0	1	66	697388863	697388928	4.12e-28
sil_4997133	7	CM009799.1	121	98529	68	1	0	1	68	698789352	698789419	8.92e-25
sil_1055199	7	CM009799.1	128	100000	69	0	0	1	69	698847220	698847288	4.12e-28	334
sil_2275698	7	CM009799.1	128	100000	69	0	0	1	69	698847223	698847155	4.12e-28	335
sil_3571115	7	CM009799.1	115	97101	69	1	1	1	69	698847223	698847156	1.48e-27	336
sil_1211213	7	CM009799.1	122	98551	69	1	0	1	69	699226456	699226388	4.12e-28	337
sil_1119401	7	CM009799.1	117	97101	69	2	0	1	69	699322340	699322408	4.12e-28
SNP_2329516	7	CM009799.1	128	100000	69	0	0	1	69	701738635	701738703	8.92e-25	338
sil_5002307	7	CM009799.1	128	100000	69	0	0	1	69	702682083	702682151	1.92e-26
sil_3572592	7	CM009799.1	117	97101	69	2	0	1	69	702936020	702935952	4.12e-28
sil_983984	7	CM009799.1	128	100000	69	0	0	1	69	703467679	703467747	4.12e-28
sil_5007628	7	CM009799.1	119	98507	67	1	0	1	67	703988108	703988174	4.12e-28	339
SNP_2278798	7	CM009799.1	128	100000	69	0	0	1	69	704137770	704137702	1.92e-26	340
sil_1205870	7	CM009799.1	122	98551	69	1	0	1	69	706188724	706188792	4.12e-28
sil_2276112	7	CM009799.1	115	97059	68	2	0	1	68	706730489	706730556	1.92e-26	347
SNP_1106188	7	CM009799.1	128	100000	69	0	0	1	69	708692470	708692538	4.12e-28	346
sil_5004041	7	CM009799.1	122	98551	69	1	0	1	69	708753169	708753237	4.12e-28	345
sil_1862161	7	CM009799.1	122	98551	69	1	0	1	69	711821580	711821512	1.92e-26
SNP_1204638	7	CM009799.1	128	100000	69	0	0	1	69	712437985	712437917	4.12e-28	350
sil_1126521	7	CM009799.1	122	100000	66	0	0	1	66	712526279	712526344	4.12e-28
sil_1070953	7	CM009799.1	128	100000	69	0	0	1	69	712526602	712526534	4.12e-28	351
sil_2290136	7	CM009799.1	121	98551	69	0	1	1	69	712647567	712647500	4.12e-28
sil_3572018	7	CM009799.1	128	100000	69	0	0	1	69	713407605	713407673	4.12e-28
sil_4994978	7	CM009799.1	122	98551	69	1	0	1	69	713407608	713407540	4.12e-28
sil_4262844	7	CM009799.1	115	97059	68	2	0	2	69	713731928	713731995	4.12e-28
sil_4997621	7	CM009799.1	124	100000	67	0	0	1	67	713847069	713847135	4.12e-28
sil_1266846	7	CM009799.1	122	98551	69	1	0	1	69	714181415	714181347	1.92e-26
sil_5004187	7	CM009799.1	124	100000	67	0	0	3	69	714329467	714329533	1.92e-26
SNP_1354500	7	CM009799.1	128	100000	69	0	0	1	69	714374125	714374193	8.92e-25	352
sil_1112364	7	CM009799.1	128	100000	69	0	0	1	69	714405158	714405226	4.12e-28
sil_1315376	7	CM009799.1	128	100000	69	0	0	1	69	716363580	716363648	1.92e-26	359
sil_1227495	7	CM009799.1	122	98551	69	1	0	1	69	717259190	717259258	4.12e-28	354
sil_1267388	7	CM009799.1	122	98551	69	1	0	1	69	717756088	717756156	4.12e-28
sil_5002164	7	CM009799.1	115	98485	66	0	1	1	66	717757428	717757492	4.12e-28
sil_4997942	7	CM009799.1	115	97059	68	2	0	1	68	718511250	718511317	4.12e-28
sil_1698884	7	CM009799.1	126	100000	68	0	0	1	68	718554876	718554943	4.12e-28
sil_3570291	7	CM009799.1	128	100000	69	0	0	1	69	718756494	718756426	4.12e-28
sil_2282138	7	CM009799.1	128	100000	69	0	0	1	69	718896342	718896410	4.12e-28
sil_1264701	7	CM009799.1	122	98551	69	1	0	1	69	719437869	719437801	4.12e-28
sil_5002757	7	CM009799.1	128	100000	69	0	0	1	69	719446710	719446778	4.12e-28

## Sheet: b) alignment vs einkorn genome
Table S4_b. Physical position on T. monococcum contigs (TGAC WGS monococcum v1) assigned to DArT markers of Triticum monococcum
marker	TGAC_WGS_monococcum_v1	bitscore	% identity	alignment length	mismatches	gapopens	q.start	q.end	s.start	s.end	evalue
sil_1008163	contig_921293	117	98.48	66	1	0	21	69	56	8	3e-14
sil_1009567	contig_906981	117	98.48	66	1	0	24	69	204	249	3e-14
sil_1024641	contig_918855	117	98.48	66	1	0	21	69	231	279	3e-14
sil_1035330	contig_936548	117	98.48	66	1	0	24	69	214	259	3e-14
sil_1035655	contig_72389	122	100	66	0	0	23	68	198	243	3e-14
sil_1058113	contig_9078	122	100	66	0	0	24	69	213	258	3e-14
sil_1072802	contig_910699	122	100	66	0	0	15	67	53	1	8e-15
sil_1079092	contig_927903	122	100	66	0	0	21	69	52	4	3e-14
sil_1080417	contig_80410	122	100	66	0	0	21	69	53	5	3e-14
sil_1080750	contig_70307	117	98.48	66	1	0	24	69	56	11	3e-14
sil_1087863	contig_2215542	122	100	66	0	0	23	69	224	270	8e-15
sil_1088263	contig_10770	117	98.48	66	1	0	22	67	46	1	3e-14
sil_1089562	contig_968043	122	100	66	0	0	23	69	952	998	8e-15
sil_1090853	contig_956877	117	98.48	66	1	0	24	69	51	6	3e-14
sil_1091014	contig_2252952	117	98.48	66	1	0	24	69	232	277	3e-14
sil_1100341	contig_933536	122	100	66	0	0	24	69	178	223	3e-14
sil_1104833	contig_1412059	117	98.48	66	1	0	24	69	60	15	3e-14
sil_1108888	contig_2199636	117	98.48	66	1	0	24	69	58	13	3e-14
sil_1112635	contig_936141	117	98.48	66	1	0	24	69	50	5	3e-14
sil_1124909	contig_2197926	117	98.48	66	1	0	24	69	46	1	3e-14
sil_1136190	contig_2203153	117	98.48	66	1	0	24	69	57	12	3e-14
sil_1182840	contig_907427	122	100	66	0	0	23	69	57	11	8e-15
sil_1205215	contig_2205044	117	98.48	66	1	0	24	69	170	215	3e-14
sil_1215068	contig_910043	122	100	66	0	0	24	69	46	1	3e-14
sil_1216482	contig_2230401	117	98.48	66	1	0	24	69	65	20	3e-14
sil_1235690	contig_1214062	117	98.48	66	1	0	24	69	52	7	3e-14
sil_1238501	contig_926843	122	100	66	0	0	23	69	246	292	8e-15
sil_1266846	contig_917639	122	100	66	0	0	24	69	48	3	3e-14
sil_1279296	contig_71167	122	100	66	0	0	16	69	163	215	8e-15
sil_1391469	contig_19191	122	100	66	0	0	24	69	47	2	3e-14
sil_1408715	contig_98718	117	98.48	66	1	0	21	69	55	7	3e-14
sil_1409324	contig_928742	122	100	66	0	0	24	69	260	305	3e-14
sil_1672665	contig_920314	117	98.48	66	1	0	24	69	184	229	3e-14
sil_1684259	contig_990657	117	98.48	66	1	0	20	69	53	5	3e-14
sil_1861481	contig_963545	122	100	66	0	0	24	69	172	217	3e-14
sil_1861532	contig_2224962	122	100	66	0	0	24	69	150	195	3e-14
sil_1864468	contig_923905	122	100	66	0	0	23	69	177	223	8e-15
sil_2248858	contig_930124	117	98.48	66	1	0	18	69	59	7	3e-14
sil_2262660	contig_932329	117	98.48	66	1	0	24	69	50	5	3e-14
sil_2276731	contig_934959	117	98.48	66	1	0	24	69	49	4	3e-14
sil_2278336	contig_80492	122	100	66	0	0	23	69	152	198	8e-15
sil_2321508	contig_10505	122	100	66	0	0	24	69	219	264	3e-14
sil_2371701	contig_85328	117	98.48	66	1	0	24	69	58	13	3e-14
sil_3571123	contig_2233798	122	100	66	0	0	23	69	47	1	8e-15
sil_3571374	contig_921814	115	98.48	66	0	1	30	69	246	285	6e-11
sil_3571548	contig_124650	117	98.48	66	1	0	24	69	48	3	3e-14
sil_3571705	contig_2273596	122	100	66	0	0	24	69	53	8	3e-14
sil_3571762	contig_1044530	117	98.48	66	1	0	24	69	199	244	3e-14
sil_3571880	contig_30064	122	100	66	0	0	24	69	47	2	3e-14
sil_3572585	contig_921821	117	98.48	66	1	0	24	69	186	231	3e-14
sil_3572698	contig_2199528	122	100	66	0	0	36	69	3079	3112	3e-09
sil_3572967	contig_912388	117	98.48	66	1	0	24	69	48	3	3e-14
sil_3573217	contig_960778	122	100	66	0	0	37	69	302	334	1e-08
sil_3573605	contig_50923	122	100	66	0	0	39	69	35	5	1e-07
sil_3573791	contig_76570	117	98.48	66	1	0	32	69	266	302	1e-07
sil_3574864	contig_23368	117	98.48	66	1	0	39	69	44	14	1e-07
sil_3575547	contig_1003852	122	100	66	0	0	36	69	35	2	1e-07
sil_3575619	contig_95175	122	100	66	0	0	36	69	51	18	1e-07
sil_3575660	contig_2311635	122	100	66	0	0	36	69	173	206	1e-07
sil_3939855	contig_2262097	117	98.48	66	1	0	40	69	43	14	5e-07
sil_3947469	contig_2262097	117	98.48	66	1	0	40	69	38	9	5e-07
sil_4004843	contig_2201217	117	98.48	66	1	0	24	69	55	10	3e-14
sil_4664125	contig_989261	117	98.48	66	1	0	42	69	32	5	6e-06
sil_4993924	contig_1137063	117	98.48	66	1	0	24	69	48	3	3e-14
sil_4993972	contig_2218724	122	100	66	0	0	42	69	29	2	6e-06
sil_4994034	contig_2201379	117	98.48	66	1	0	42	69	681	708	6e-06
sil_4994390	contig_906707	122	100	66	0	0	42	69	35	8	6e-06
sil_4994974	contig_112170	117	98.48	66	1	0	42	69	33	6	6e-06
sil_4996190	contig_961772	122	100	66	0	0	42	69	640	667	6e-06
sil_4996416	contig_1115791	117	98.48	66	1	0	42	69	878	905	6e-06
sil_4996726	contig_1694806	122	100	66	0	0	42	69	67	40	6e-06
sil_4996843	contig_912100	115	98.48	66	0	1	30	69	41	2	6e-11
sil_4996913	contig_912537	122	100	66	0	0	42	69	189	216	6e-06
sil_4997204	contig_947311	122	100	66	0	0	42	69	209	236	6e-06
sil_4997282	contig_1026735	122	100	66	0	0	42	69	208	235	6e-06
sil_4997329	contig_143909	122	100	66	0	0	23	69	49	3	8e-15
sil_4997669	contig_1941083	122	100	66	0	0	42	69	197	224	6e-06
sil_4997765	contig_996084	122	100	66	0	0	42	69	37	10	6e-06
sil_4997786	contig_15386	122	100	66	0	0	23	69	215	261	8e-15
sil_4997911	contig_8906	122	100	66	0	0	42	69	35	8	6e-06
sil_4998407	contig_924792	117	98.48	66	1	0	42	69	851	878	6e-06
sil_4998418	contig_932139	122	100	66	0	0	42	69	486	513	6e-06
sil_4999177	contig_983278	122	100	66	0	0	23	69	198	244	8e-15
sil_4999263	contig_2202747	122	100	66	0	0	42	69	269	296	6e-06
sil_5001715	contig_932813	117	98.48	66	1	0	42	69	36	9	6e-06
sil_5001822	contig_2196949	117	98.48	66	1	0	42	69	211	238	6e-06
sil_5002344	contig_937866	122	100	66	0	0	18	69	76	23	8e-15
sil_5002615	contig_915247	117	98.48	66	1	0	1	53	2711	2659	8e-15
sil_5002683	contig_2220079	117	98.48	66	1	0	24	69	148	193	3e-14
sil_5002724	contig_2201332	122	100	66	0	0	22	68	47	1	8e-15
sil_5003299	contig_931567	122	100	66	0	0	23	69	185	231	8e-15
sil_5003691	contig_914025	122	100	66	0	0	36	64	336	364	2e-06
sil_5004224	contig_920492	122	100	66	0	0	38	69	39	8	4e-08
sil_5004967	contig_911593	122	100	66	0	0	35	69	34	1	1e-07
sil_5005021	contig_928742	115	98.48	66	0	1	40	69	681	710	5e-07
sil_5005604	contig_1299994	115	98.48	66	0	1	29	69	49	9	2e-11
sil_5006028	contig_1281718	122	100	66	0	0	40	69	65	36	5e-07
sil_5006039	contig_1031284	122	100	66	0	0	40	69	225	254	5e-07
sil_5006169	contig_941847	122	100	66	0	0	23	69	57	11	8e-15
sil_5006688	contig_942594	122	100	66	0	0	37	69	49	18	2e-06
sil_5006851	contig_2205250	122	100	66	0	0	41	69	29	1	2e-06
sil_5007004	contig_915914	122	100	66	0	0	41	69	30	2	2e-06
sil_5007032	contig_21151	117	98.48	66	1	0	38	69	32	1	2e-06
sil_5007940	contig_2200706	122	100	66	0	0	37	69	34	3	2e-06
sil_5008105	contig_996075	122	100	66	0	0	41	69	263	291	2e-06
sil_5008146	contig_2219127	122	100	66	0	0	38	69	43	11	2e-06
sil_5008359	contig_939586	122	100	66	0	0	41	69	198	226	2e-06
sil_5009638	contig_125503	122	100	66	0	0	42	69	382	409	6e-06
sil_5009835	contig_919212	122	100	66	0	0	42	69	45	18	6e-06
sil_5010189	contig_914163	122	100	66	0	0	13	69	60	6	8e-15
sil_5010232	contig_933734	117	98.48	66	1	0	42	69	209	236	6e-06
sil_5010285	contig_8812	115	98.48	66	0	1	38	69	55	24	4e-08
sil_5010296	contig_905827	122	100	66	0	0	36	69	65	31	6e-06
sil_5010663	contig_47478	117	98.48	66	1	0	42	69	29	2	6e-06
sil_981817	contig_967321	122	100	66	0	0	42	69	37	10	6e-06
sil_981872	contig_73640	122	100	66	0	0	23	69	48	2	8e-15
sil_988252	contig_10573	117	98.48	66	1	0	42	69	357	384	6e-06
sil_991456	contig_90974	122	100	66	0	0	23	69	288	334	8e-15
sil_991609	contig_925265	117	98.48	66	1	0	42	69	36	9	6e-06
sil_998804	contig_916327	122	100	66	0	0	24	69	49	4	3e-14
SNP_100000836	contig_906634	117	98.48	66	1	0	24	69	49	4	3e-14
SNP_100002476	contig_71871	117	98.48	66	1	0	24	69	46	1	3e-14
SNP_100003214	contig_11569	122	100	66	0	0	24	69	54	9	3e-14
SNP_100003939	contig_127581	122	100	66	0	0	24	69	48	3	3e-14
SNP_100003961	contig_2233264	122	100	66	0	0	24	69	57	12	3e-14
SNP_100004576	contig_1053540	122	100	66	0	0	24	69	53	8	3e-14
SNP_100005011	contig_965947	117	98.48	66	1	0	24	69	155	200	3e-14
SNP_100063935	contig_1845216	122	100	66	0	0	24	69	50	5	3e-14
SNP_1012496	contig_915778	122	100	66	0	0	21	69	50	2	3e-14
SNP_1050473	contig_2208532	122	100	66	0	0	24	69	216	261	3e-14
SNP_1077755	contig_912786	122	100	66	0	0	21	69	52	4	3e-14
SNP_1090311	contig_2204326	122	100	66	0	0	24	69	46	1	3e-14
SNP_1201035	contig_933943	117	98.48	66	1	0	24	69	52	7	3e-14
SNP_1206715	contig_964052	122	100	66	0	0	24	69	192	237	3e-14
SNP_1225740	contig_2198912	117	98.48	66	1	0	23	68	209	254	3e-14
SNP_1228607	contig_932214	122	100	66	0	0	21	69	51	3	3e-14
SNP_1387861	contig_961524	122	100	66	0	0	24	69	247	292	3e-14
SNP_2256019	contig_2204690	117	98.48	66	1	0	24	69	275	320	3e-14
SNP_2259754	contig_2221941	122	100	66	0	0	24	69	58	13	3e-14
SNP_2276667	contig_2203462	122	100	66	0	0	24	69	153	198	3e-14
SNP_2295852	contig_2206866	117	98.48	66	1	0	24	69	52	7	3e-14
SNP_2297047	contig_943889	117	98.48	66	1	0	24	69	47	2	3e-14
SNP_2330268	contig_912146	122	100	66	0	0	24	69	229	274	3e-14
SNP_3571820	contig_2210972	122	100	66	0	0	24	69	220	265	3e-14
SNP_3574194	contig_2214503	122	100	66	0	0	21	69	209	257	3e-14
SNP_3574212	contig_84626	117	98.48	66	1	0	24	69	305	350	3e-14
SNP_3574217	contig_931980	122	100	66	0	0	24	69	46	1	3e-14
SNP_3574448	contig_939622	117	98.48	66	1	0	21	69	205	253	3e-14
SNP_3575158	contig_2198373	122	100	66	0	0	24	69	56	11	3e-14
sil_1007006	contig_912841	119	98.51	67	1	0	41	69	32	4	2e-06
sil_1018669	contig_973346	119	98.51	67	1	0	39	69	39	9	1e-07
sil_1039983	contig_2211510	124	100	67	0	0	42	69	290	317	6e-06
sil_1049325	contig_937837	124	100	67	0	0	37	68	31	1	6e-06
sil_1049498	contig_922246	119	98.51	67	1	0	36	69	191	224	3e-09
sil_1062335	contig_13730	119	98.51	67	1	0	42	69	36	9	6e-06
sil_1090430	contig_1762160	113	97.01	67	2	0	36	69	36	3	3e-09
sil_1092482	contig_996479	124	100	67	0	0	36	69	50	17	3e-09
sil_1092732	contig_2205442	124	100	67	0	0	42	69	37	10	6e-06
sil_1099213	contig_17651	124	100	67	0	0	42	69	352	379	6e-06
sil_1102316	contig_921448	113	97.01	67	2	0	35	69	48	14	8e-10
sil_1106432	contig_94221	119	98.51	67	1	0	42	69	51	24	6e-06
sil_1110336	contig_933630	119	98.51	67	1	0	36	69	49	16	3e-09
sil_1110873	contig_910533	124	100	67	0	0	36	69	177	210	3e-09
sil_1116860	contig_2233216	117	98.51	67	0	1	41	69	255	283	2e-06
sil_1117195	contig_70675	113	97.01	67	2	0	32	69	53	16	8e-10
sil_1117897	contig_2223681	119	98.51	67	1	0	42	69	53	26	6e-06
sil_1124377	contig_82729	111	97.01	67	1	1	23	69	61	15	8e-15
sil_1125046	contig_955883	117	98.51	67	0	1	38	69	45	14	4e-08
sil_1149893	contig_2201564	119	98.51	67	1	0	36	69	225	258	3e-09
sil_1155148	contig_2202503	119	98.51	67	1	0	36	69	196	229	3e-09
sil_1177721	contig_909755	124	100	67	0	0	42	69	174	201	6e-06
sil_1205101	contig_934959	119	98.51	67	1	0	42	69	41	14	6e-06
sil_1209578	contig_937635	119	98.51	67	1	0	42	69	541	568	6e-06
sil_1209768	contig_2209605	113	97.01	67	2	0	35	69	198	232	8e-10
sil_1216100	contig_2217155	119	98.51	67	1	0	36	69	43	10	3e-09
sil_1217762	contig_910151	124	100	67	0	0	39	66	28	1	6e-06
sil_1225721	contig_907142	119	98.51	67	1	0	36	69	179	212	3e-09
sil_1227404	contig_921190	124	100	67	0	0	33	69	189	226	3e-09
sil_1230598	contig_80419	124	100	67	0	0	42	69	53	26	6e-06
sil_1296899	contig_918946	113	97.01	67	2	0	35	69	248	282	8e-10
sil_1314848	contig_918744	124	100	67	0	0	33	69	39	3	3e-09
sil_1669262	contig_2201003	111	97.01	67	1	1	39	69	60	30	1e-07
sil_1713867	contig_70704	119	98.51	67	1	0	42	69	39	12	6e-06
sil_1720372	contig_964659	111	97.01	67	1	1	20	69	51	2	8e-15
sil_1754540	contig_919107	119	98.51	67	1	0	42	69	49	22	6e-06
sil_1765110	contig_1352995	113	97.01	67	2	0	23	69	68	21	8e-10
sil_1859751	contig_944315	124	100	67	0	0	36	69	171	204	3e-09
sil_1861978	contig_13353	124	100	67	0	0	42	69	57	30	6e-06
sil_1864911	contig_968051	124	100	67	0	0	39	69	42	11	6e-06
sil_2257042	contig_913333	124	100	67	0	0	33	69	42	6	3e-09
sil_2277189	contig_980829	124	100	67	0	0	42	69	41	14	6e-06
sil_2278345	contig_2284539	119	98.51	67	1	0	42	69	179	206	6e-06
sil_2279498	contig_938955	124	100	67	0	0	42	69	46	19	6e-06
sil_2280333	contig_97245	113	97.01	67	2	0	36	69	37	4	3e-09
sil_2296458	contig_2197856	119	98.51	67	1	0	42	69	41	14	6e-06
sil_2306298	contig_75132	124	100	67	0	0	42	69	34	7	6e-06
sil_3570347	contig_2213006	113	97.01	67	2	0	36	69	35	2	3e-09
sil_3570409	contig_11036	124	100	67	0	0	36	69	74	41	3e-09
sil_3570424	contig_979027	119	98.51	67	1	0	36	69	231	264	3e-09
sil_3570763	contig_971159	124	100	67	0	0	36	69	170	203	3e-09
sil_3570768	contig_933528	124	100	67	0	0	36	69	223	256	3e-09
sil_3570967	contig_91371	119	98.51	67	1	0	36	69	181	214	3e-09
sil_3570975	contig_1197596	124	100	67	0	0	33	69	193	230	3e-09
sil_3571094	contig_940159	124	100	67	0	0	36	69	259	292	3e-09
sil_3571344	contig_923938	124	100	67	0	0	36	69	288	321	3e-09
sil_3572172	contig_2238103	113	97.01	67	2	0	23	69	163	210	8e-10
sil_3572318	contig_83965	124	100	67	0	0	33	69	157	193	3e-09
sil_3572448	contig_1473527	119	98.51	67	1	0	36	69	36	3	3e-09
sil_3573192	contig_984767	119	98.51	67	1	0	37	69	168	200	1e-08
sil_3573230	contig_2206525	113	97.01	67	2	0	30	69	44	6	1e-08
sil_3573545	contig_910533	117	98.51	67	0	1	23	69	58	12	8e-15
sil_3573657	contig_986630	124	100	67	0	0	34	69	222	257	1e-08
sil_3573672	contig_2253594	124	100	67	0	0	37	69	49	17	1e-08
sil_3573711	contig_76405	124	100	67	0	0	37	69	44	12	1e-08
sil_3573815	contig_947572	124	100	67	0	0	37	69	40	8	1e-08
sil_3575024	contig_905362	124	100	67	0	0	37	69	43	11	1e-08
sil_3575141	contig_1012533	119	98.51	67	1	0	36	68	33	1	1e-08
sil_3937827	contig_37902	119	98.51	67	1	0	37	69	37	5	1e-08
sil_3942364	contig_37902	119	98.51	67	1	0	37	69	48	16	1e-08
sil_3947149	contig_134713	111	97.01	67	1	1	42	69	239	266	6e-06
sil_4262844	contig_920442	124	100	67	0	0	42	69	165	192	6e-06
sil_4994028	contig_921448	119	98.51	67	1	0	34	69	302	337	1e-08
sil_4994485	contig_71803	119	98.51	67	1	0	37	69	45	13	1e-08
sil_4994601	contig_1568932	119	98.51	67	1	0	42	69	161	188	6e-06
sil_4994748	contig_1293766	113	97.01	67	2	0	37	69	49	17	1e-08
sil_4994762	contig_71803	119	98.51	67	1	0	37	69	33	1	1e-08
sil_4995188	contig_909468	111	97.01	67	1	1	24	69	174	219	3e-14
sil_4996062	contig_20310	124	100	67	0	0	37	69	447	479	1e-08
sil_4996083	contig_175076	119	98.51	67	1	0	42	69	39	12	6e-06
sil_4996203	contig_907502	113	97.01	67	2	0	37	69	224	256	1e-08
sil_4996618	contig_990855	124	100	67	0	0	37	69	46	14	1e-08
sil_4996835	contig_910847	124	100	67	0	0	26	69	72	27	1e-08
sil_4997169	contig_9939	119	98.51	67	1	0	33	69	459	494	1e-08
sil_4998184	contig_932838	124	100	67	0	0	37	69	517	549	1e-08
sil_4998462	contig_1725388	124	100	67	0	0	42	69	31	4	6e-06
sil_4998678	contig_2224144	124	100	67	0	0	42	69	180	207	6e-06
sil_4998856	contig_993759	124	100	67	0	0	37	69	34	2	1e-08
sil_4999139	contig_129811	119	98.51	67	1	0	37	69	33	1	1e-08
sil_4999388	contig_950656	124	100	67	0	0	42	69	32	5	6e-06
sil_4999673	contig_922588	124	100	67	0	0	37	69	51	19	1e-08
sil_4999856	contig_2198648	119	98.51	67	1	0	42	69	36	9	6e-06
sil_5002520	contig_2273786	113	97.01	67	2	0	35	69	46	12	8e-10
sil_5002992	contig_2199302	124	100	67	0	0	37	69	270	302	1e-08
sil_5003166	contig_1476215	111	97.01	67	1	1	42	69	32	5	6e-06
sil_5003251	contig_941448	124	100	67	0	0	37	69	36	4	1e-08
sil_5003715	contig_932139	124	100	67	0	0	37	69	56	24	1e-08
sil_5003816	contig_126314	119	98.51	67	1	0	37	69	33	1	1e-08
sil_5003843	contig_946275	119	98.51	67	1	0	37	69	53	21	1e-08
sil_5003975	contig_1013464	124	100	67	0	0	37	69	60	28	1e-08
sil_5004030	contig_1479522	124	100	67	0	0	42	69	176	203	6e-06
sil_5004406	contig_71803	119	98.51	67	1	0	31	69	65	26	1e-08
sil_5004878	contig_904687	113	97.01	67	2	0	37	69	45	13	1e-08
sil_5005034	contig_920229	113	97.01	67	2	0	37	69	66	34	1e-08
sil_5005055	contig_2210734	124	100	67	0	0	42	69	195	222	6e-06
sil_5005187	contig_2197755	124	100	67	0	0	37	69	652	684	1e-08
sil_5005357	contig_917571	124	100	67	0	0	34	69	1716	1751	1e-08
sil_5005599	contig_85106	119	98.51	67	1	0	42	69	172	199	6e-06
sil_5005702	contig_2201564	113	97.01	67	2	0	37	69	53	21	1e-08
sil_5005867	contig_2208996	119	98.51	67	1	0	37	69	39	7	1e-08
sil_5005911	contig_994492	124	100	67	0	0	37	69	34	2	1e-08
sil_5006148	contig_82366	119	98.51	67	1	0	33	68	37	1	1e-08
sil_5006201	contig_120978	124	100	67	0	0	42	69	195	222	6e-06
sil_5007323	contig_1011750	119	98.51	67	1	0	37	69	50	18	1e-08
sil_5007687	contig_2223681	113	97.01	67	2	0	35	69	39	5	8e-10
sil_5007701	contig_908514	124	100	67	0	0	37	69	35	3	1e-08
sil_5007706	contig_97245	119	98.51	67	1	0	37	69	41	9	1e-08
sil_5007961	contig_112026	119	98.51	67	1	0	37	69	42	10	1e-08
sil_5009537	contig_920989	124	100	67	0	0	42	69	178	205	6e-06
sil_5009906	contig_935795	124	100	67	0	0	37	69	34	2	1e-08
sil_5009932	contig_47478	124	100	67	0	0	37	69	57	25	1e-08
sil_5010133	contig_927825	119	98.51	67	1	0	37	69	38	6	1e-08
sil_5010463	contig_2215296	119	98.51	67	1	0	41	68	28	1	6e-06
sil_977707	contig_942694	124	100	67	0	0	42	69	32	5	6e-06
sil_977751	contig_9930	113	97.01	67	2	0	30	69	1501	1542	8e-10
sil_980743	contig_1068893	124	100	67	0	0	42	69	33	6	6e-06
sil_984447	contig_987820	119	98.51	67	1	0	42	69	37	10	6e-06
sil_991212	contig_124480	124	100	67	0	0	42	69	32	5	6e-06
sil_991477	contig_1005304	124	100	67	0	0	42	69	57	30	6e-06
sil_993147	contig_933237	124	100	67	0	0	42	69	38	11	6e-06
SNP_100000423	contig_98591	119	98.51	67	1	0	42	69	37	10	6e-06
SNP_100000988	contig_921678	124	100	67	0	0	42	69	178	205	6e-06
SNP_100002998	contig_19399	124	100	67	0	0	42	69	169	196	6e-06
SNP_100003559	contig_2202227	124	100	67	0	0	38	65	28	1	6e-06
SNP_100008485	contig_1243981	124	100	67	0	0	42	69	37	10	6e-06
SNP_100008913	contig_1006158	124	100	67	0	0	42	69	287	314	6e-06
SNP_100008937	contig_906718	124	100	67	0	0	42	69	51	24	6e-06
SNP_100009106	contig_2198926	124	100	67	0	0	39	69	178	209	6e-06
SNP_100016502	contig_2200464	119	98.51	67	1	0	1	38	312	349	2e-11
SNP_1008530	contig_127517	124	100	67	0	0	42	69	34	7	6e-06
SNP_1043022	contig_1044376	124	100	67	0	0	42	69	196	223	6e-06
SNP_1082841	contig_942436	124	100	67	0	0	42	69	230	257	6e-06
SNP_1103775	contig_98678	124	100	67	0	0	1	69	439	371	1e-28
SNP_1224218	contig_934314	124	100	67	0	0	40	69	256	285	5e-07
SNP_1666638	contig_2205008	119	98.51	67	1	0	34	69	46	11	2e-10
SNP_1684036	contig_928876	124	100	67	0	0	40	69	210	239	5e-07
SNP_2276000	contig_83757	117	98.51	67	0	1	33	69	162	198	1e-07
SNP_3574185	contig_1252913	124	100	67	0	0	41	69	40	12	2e-06
SNP_3574961	contig_70310	124	100	67	0	0	41	69	47	19	2e-06
SNP_3940729	contig_146691	124	100	67	0	0	41	69	32	4	2e-06
SNP_3942183	contig_81092	119	98.51	67	1	0	34	69	39	4	2e-10
sil_1003407	contig_926081	121	98.53	68	1	0	22	69	58	11	5e-12
sil_1010734	contig_1038134	126	100	68	0	0	28	69	58	17	5e-12
sil_1013863	contig_924919	121	98.53	68	1	0	28	69	500	541	5e-12
sil_1020699	contig_981923	126	100	68	0	0	28	69	52	11	5e-12
sil_1024158	contig_1327980	115	97.06	68	2	0	28	69	46	5	5e-12
sil_1027470	contig_932838	113	97.06	68	1	1	25	68	246	290	2e-11
sil_1047205	contig_947572	121	98.53	68	1	0	28	69	45	4	5e-12
sil_1049998	contig_954083	121	98.53	68	1	0	23	69	416	463	4e-13
sil_1063157	contig_2207989	121	98.53	68	1	0	24	69	47	3	5e-12
sil_1075069	contig_936406	121	98.53	68	1	0	24	67	44	1	4e-13
sil_1080814	contig_2207542	121	98.53	68	1	0	25	69	52	8	5e-12
sil_1088777	contig_916734	121	98.53	68	1	0	28	69	447	488	5e-12
sil_1090516	contig_2231441	115	97.06	68	2	0	27	69	465	507	1e-12
sil_1091379	contig_8803	121	98.53	68	1	0	23	69	60	14	4e-13
sil_1096273	contig_975426	126	100	68	0	0	28	69	302	343	5e-12
sil_1098524	contig_110429	121	98.53	68	1	0	28	69	43	2	5e-12
sil_1099648	contig_907521	126	100	68	0	0	37	69	34	2	1e-08
sil_1099890	contig_17218	126	100	68	0	0	28	69	54	13	5e-12
sil_1113963	contig_2207037	121	98.53	68	1	0	26	69	53	10	4e-13
sil_1114283	contig_929998	115	97.06	68	2	0	24	69	53	8	1e-12
sil_1119700	contig_941412	121	98.53	68	1	0	26	69	57	14	4e-13
sil_1121262	contig_905933	126	100	68	0	0	37	69	58	26	1e-08
sil_1123674	contig_2200617	119	98.53	68	0	1	37	69	53	21	1e-08
sil_1132843	contig_915748	126	100	68	0	0	37	69	38	6	1e-08
sil_1164201	contig_925180	115	97.06	68	2	0	24	69	47	1	1e-12
sil_1202938	contig_950548	121	98.53	68	1	0	26	69	46	3	4e-13
sil_1209836	contig_70675	126	100	68	0	0	37	69	192	224	1e-08
sil_1213432	contig_142786	126	100	68	0	0	28	69	42	1	5e-12
sil_1240490	contig_905539	126	100	68	0	0	37	69	223	255	1e-08
sil_1256157	contig_1033291	126	100	68	0	0	37	69	48	16	1e-08
sil_1269372	contig_8075	121	98.53	68	1	0	28	69	316	357	5e-12
sil_1279614	contig_99270	121	98.53	68	1	0	26	69	165	208	4e-13
sil_1296123	contig_1242512	121	98.53	68	1	0	26	69	61	18	4e-13
sil_1306745	contig_87937	126	100	68	0	0	37	69	207	239	1e-08
sil_1407514	contig_84248	113	97.06	68	1	1	29	69	46	6	2e-11
sil_1669898	contig_921956	121	98.53	68	1	0	28	69	44	3	5e-12
sil_1699268	contig_2289202	126	100	68	0	0	28	69	648	689	5e-12
sil_1716474	contig_928241	126	100	68	0	0	28	69	60	19	5e-12
sil_1722647	contig_73600	119	98.53	68	0	1	37	69	185	217	1e-08
sil_1723384	contig_911032	115	97.06	68	2	0	24	69	50	5	1e-12
sil_1860347	contig_1034960	126	100	68	0	0	28	69	45	4	5e-12
sil_1860991	contig_980329	115	97.06	68	2	0	28	69	66	25	5e-12
sil_1861985	contig_2212879	115	97.06	68	2	0	24	69	62	18	5e-12
sil_2250411	contig_12239	121	98.53	68	1	0	28	69	59	18	5e-12
sil_2256628	contig_2237599	126	100	68	0	0	28	69	169	210	5e-12
sil_2275208	contig_14226	126	100	68	0	0	28	69	42	1	5e-12
sil_2277039	contig_8323	121	98.53	68	1	0	26	69	529	572	4e-13
sil_2293563	contig_936145	126	100	68	0	0	37	69	43	11	1e-08
sil_2296470	contig_945057	121	98.53	68	1	0	26	69	178	221	4e-13
sil_2333777	contig_907408	126	100	68	0	0	28	69	165	206	5e-12
sil_3533784	contig_153783	126	100	68	0	0	28	69	202	243	5e-12
sil_3570553	contig_18310	126	100	68	0	0	20	69	61	10	5e-12
sil_3570760	contig_969494	121	98.53	68	1	0	25	68	257	300	4e-13
sil_3570823	contig_989445	126	100	68	0	0	25	69	45	1	5e-12
sil_3570997	contig_2198845	126	100	68	0	0	28	69	42	1	5e-12
sil_3571220	contig_917387	126	100	68	0	0	28	69	184	225	5e-12
sil_3571298	contig_926372	126	100	68	0	0	28	69	65	24	5e-12
sil_3571346	contig_948090	115	97.06	68	2	0	22	69	172	219	5e-12
sil_3571363	contig_121553	126	100	68	0	0	37	69	181	213	1e-08
sil_3571879	contig_933479	126	100	68	0	0	25	69	230	274	5e-12
sil_3572262	contig_922838	115	97.06	68	2	0	28	69	198	239	5e-12
sil_3572402	contig_940614	126	100	68	0	0	28	69	194	235	5e-12
sil_3572430	contig_99166	126	100	68	0	0	28	69	57	16	5e-12
sil_3572990	contig_74004	113	97.06	68	1	1	29	69	54	14	2e-11
sil_3572992	contig_1924114	126	100	68	0	0	28	69	150	191	5e-12
sil_3573234	contig_2210284	126	100	68	0	0	25	69	48	4	5e-12
sil_3573273	contig_1003709	126	100	68	0	0	27	68	62	21	5e-12
sil_3573317	contig_8150	126	100	68	0	0	1	47	573	619	2e-16
sil_3573817	contig_27903	121	98.53	68	1	0	24	69	50	6	5e-12
sil_3573830	contig_951407	115	97.06	68	2	0	28	69	193	234	5e-12
sil_3574942	contig_153783	115	97.06	68	2	0	28	69	48	7	5e-12
sil_3575305	contig_780395	126	100	68	0	0	25	69	47	3	5e-12
sil_3575414	contig_975107	126	100	68	0	0	21	69	53	7	5e-12
sil_3575759	contig_933181	126	100	68	0	0	16	69	70	17	5e-12
sil_3950912	contig_2211701	121	98.53	68	1	0	28	69	215	256	5e-12
sil_3953107	contig_10457	126	100	68	0	0	28	69	57	16	5e-12
sil_3957450	contig_72289	115	97.06	68	2	0	24	69	51	6	1e-12
sil_4396019	contig_94221	121	98.53	68	1	0	26	69	51	8	4e-13
sil_4409371	contig_992681	126	100	68	0	0	25	69	47	4	2e-11
sil_4411024	contig_928953	126	100	68	0	0	29	69	45	5	2e-11
sil_4994029	contig_73296	126	100	68	0	0	19	69	164	213	2e-11
sil_4994204	contig_1681639	115	97.06	68	2	0	23	68	66	19	2e-11
sil_4994386	contig_9839	126	100	68	0	0	29	69	41	1	2e-11
sil_4994458	contig_926921	126	100	68	0	0	39	69	55	25	1e-07
sil_4994736	contig_76366	126	100	68	0	0	40	69	42	13	5e-07
sil_4994900	contig_966333	113	97.06	68	1	1	29	69	465	505	2e-11
sil_4995144	contig_105983	126	100	68	0	0	29	69	48	8	2e-11
sil_4995395	contig_141448	121	98.53	68	1	0	29	69	48	8	2e-11
sil_4995459	contig_1453093	126	100	68	0	0	33	69	72	38	5e-07
sil_4995466	contig_930666	126	100	68	0	0	29	69	148	188	2e-11
sil_4995895	contig_946415	126	100	68	0	0	29	69	49	9	2e-11
sil_4995920	contig_945678	119	98.53	68	0	1	28	69	60	19	5e-12
sil_4996047	contig_957589	126	100	68	0	0	34	69	35	1	2e-06
sil_4996318	contig_2230205	113	97.06	68	1	1	29	69	49	9	2e-11
sil_4996429	contig_125068	126	100	68	0	0	29	69	41	1	2e-11
sil_4996449	contig_931623	121	98.53	68	1	0	27	69	50	8	1e-12
sil_4996883	contig_922838	115	97.06	68	2	0	29	69	47	7	2e-11
sil_4997267	contig_71118	121	98.53	68	1	0	25	69	59	16	2e-11
sil_4997556	contig_1202452	115	97.06	68	2	0	27	69	45	3	1e-12
sil_4997696	contig_923877	126	100	68	0	0	26	69	202	246	2e-11
sil_4997831	contig_937623	126	100	68	0	0	41	69	41	13	2e-06
sil_4998082	contig_911013	126	100	68	0	0	29	69	47	7	2e-11
sil_4998095	contig_131937	121	98.53	68	1	0	29	69	51	11	2e-11
sil_4998339	contig_1009266	126	100	68	0	0	25	69	57	14	2e-11
sil_4998349	contig_2202554	121	98.53	68	1	0	22	69	48	2	2e-11
sil_4998457	contig_971015	126	100	68	0	0	29	69	324	364	2e-11
sil_4998643	contig_928881	126	100	68	0	0	29	69	51	11	2e-11
sil_4998715	contig_129914	115	97.06	68	2	0	29	69	42	2	2e-11
sil_4998747	contig_2197856	126	100	68	0	0	29	69	42	2	2e-11
sil_4998767	contig_942755	115	97.06	68	2	0	24	67	44	1	2e-11
sil_4998814	contig_50344	126	100	68	0	0	41	69	47	19	2e-06
sil_4998818	contig_932139	121	98.53	68	1	0	29	69	47	7	2e-11
sil_4999539	contig_1043836	126	100	68	0	0	29	69	41	1	2e-11
sil_4999621	contig_98955	126	100	68	0	0	25	69	50	7	2e-11
sil_4999638	contig_12278	115	97.06	68	2	0	29	69	291	331	2e-11
sil_4999676	contig_998223	126	100	68	0	0	29	69	45	5	2e-11
sil_4999724	contig_909179	126	100	68	0	0	41	68	28	1	6e-06
sil_4999819	contig_909328	126	100	68	0	0	29	69	41	1	2e-11
sil_5000563	contig_1019382	121	98.53	68	1	0	29	69	386	426	2e-11
sil_5001421	contig_2201770	126	100	68	0	0	42	69	42	15	6e-06
sil_5001695	contig_72298	126	100	68	0	0	29	69	52	12	2e-11
sil_5001806	contig_80729	126	100	68	0	0	42	69	37	10	6e-06
sil_5001811	contig_935954	121	98.53	68	1	0	29	69	64	24	2e-11
sil_5001980	contig_1038972	126	100	68	0	0	29	69	41	1	2e-11
sil_5002104	contig_935532	113	97.06	68	1	1	26	69	327	370	2e-11
sil_5002471	contig_2032610	121	98.53	68	1	0	29	69	56	16	2e-11
sil_5003041	contig_936323	113	97.06	68	0	1	42	69	565	592	6e-06
sil_5003274	contig_2203588	126	100	68	0	0	42	69	35	8	6e-06
sil_5003467	contig_918875	121	98.53	68	1	0	26	69	47	4	4e-13
sil_5003494	contig_907142	121	98.53	68	1	0	26	69	56	13	4e-13
sil_5004577	contig_111461	115	97.06	68	2	0	24	69	60	15	1e-12
sil_5004726	contig_935954	121	98.53	68	1	0	27	69	62	20	1e-12
sil_5004771	contig_918875	121	98.53	68	1	0	27	69	52	10	1e-12
sil_5005196	contig_101773	126	100	68	0	0	42	69	41	14	6e-06
sil_5006142	contig_972985	126	100	68	0	0	28	69	42	1	5e-12
sil_5006465	contig_946072	126	100	68	0	0	28	69	54	13	5e-12
sil_5006864	contig_2199715	126	100	68	0	0	42	69	31	4	6e-06
sil_5007056	contig_109934	115	97.06	68	2	0	28	69	63	22	5e-12
sil_5007074	contig_922078	126	100	68	0	0	28	69	58	17	5e-12
sil_5007879	contig_2199552	126	100	68	0	0	28	69	288	329	5e-12
sil_5008054	contig_870550	126	100	68	0	0	42	69	44	17	6e-06
sil_5008222	contig_933149	121	98.53	68	1	0	28	69	165	206	5e-12
sil_5008630	contig_941895	126	100	68	0	0	42	69	49	22	6e-06
sil_5008787	contig_1473522	126	100	68	0	0	42	69	61	34	6e-06
sil_5008839	contig_911593	126	100	68	0	0	28	69	50	9	5e-12
sil_5009172	contig_957600	126	100	68	0	0	42	69	225	252	6e-06
sil_5009798	contig_2261687	121	98.53	68	1	0	28	69	59	18	5e-12
sil_5009851	contig_2206301	126	100	68	0	0	29	69	50	10	2e-11
sil_5009861	contig_2200081	126	100	68	0	0	42	69	41	14	6e-06
sil_5009922	contig_947000	126	100	68	0	0	42	69	34	7	6e-06
sil_5010128	contig_920186	126	100	68	0	0	26	69	211	254	2e-11
sil_5010514	contig_922939	121	98.53	68	1	0	26	69	54	11	2e-11
sil_5010594	contig_97377	126	100	68	0	0	29	69	176	216	2e-11
sil_977565	contig_2203202	126	100	68	0	0	42	69	32	5	6e-06
sil_978303	contig_905772	126	100	68	0	0	29	69	42	2	2e-11
sil_983876	contig_74193	121	98.53	68	1	0	29	69	42	2	2e-11
sil_989967	contig_941720	121	98.53	68	1	0	29	69	43	3	2e-11
sil_990052	contig_905862	126	100	68	0	0	42	69	59	32	6e-06
sil_991507	contig_990347	121	98.53	68	1	0	25	67	43	1	1e-12
sil_992185	contig_71754	115	97.06	68	2	0	29	69	47	7	2e-11
sil_992286	contig_71134	121	98.53	68	1	0	24	69	50	5	1e-12
sil_992973	contig_911984	126	100	68	0	0	42	69	168	195	6e-06
sil_994526	contig_913893	126	100	68	0	0	29	69	42	2	2e-11
SNP_100000255	contig_908970	126	100	68	0	0	42	69	826	853	6e-06
SNP_100001659	contig_935164	126	100	68	0	0	42	69	77	50	6e-06
SNP_100003619	contig_952566	126	100	68	0	0	42	69	188	215	6e-06
SNP_100005289	contig_906817	126	100	68	0	0	42	69	256	283	6e-06
SNP_100005551	contig_908802	126	100	68	0	0	42	69	44	17	6e-06
SNP_100008451	contig_923889	121	98.53	68	1	0	27	69	47	5	1e-12
SNP_100010189	contig_149948	115	97.06	68	2	0	27	69	162	204	1e-12
SNP_100010290	contig_1068060	113	97.06	68	1	1	29	69	46	6	2e-11
SNP_100011281	contig_1008098	126	100	68	0	0	42	69	32	5	6e-06
SNP_100011386	contig_99498	126	100	68	0	0	22	69	71	24	2e-15
SNP_100016436	contig_960425	126	100	68	0	0	14	69	75	20	8e-15
SNP_100027932	contig_906595	126	100	68	0	0	24	69	47	2	3e-14
SNP_100033196	contig_1046548	126	100	68	0	0	17	69	70	20	3e-14
SNP_1003196	contig_17550	126	100	68	0	0	25	69	52	8	1e-13
SNP_1009582	contig_925505	126	100	68	0	0	22	69	66	19	1e-13
SNP_1025662	contig_916327	126	100	68	0	0	25	69	60	16	1e-13
SNP_1056226	contig_139218	121	98.53	68	1	0	24	69	51	6	1e-12
SNP_1090490	contig_11596	126	100	68	0	0	25	69	55	11	1e-13
SNP_1094303	contig_93926	126	100	68	0	0	22	69	54	7	1e-13
SNP_1270455	contig_2197125	121	98.53	68	1	0	27	69	178	220	1e-12
SNP_1407864	contig_105863	121	98.53	68	1	0	24	69	228	273	1e-12
SNP_1684703	contig_920927	126	100	68	0	0	25	69	58	14	1e-13
SNP_1861814	contig_922645	126	100	68	0	0	25	69	52	8	1e-13
SNP_2257103	contig_10374	126	100	68	0	0	25	69	51	7	1e-13
SNP_2295110	contig_2204997	126	100	68	0	0	25	69	45	1	1e-13
SNP_3573042	contig_71740	126	100	68	0	0	22	69	80	32	1e-13
SNP_3575006	contig_941559	126	100	68	0	0	25	69	60	16	1e-13
SNP_3575235	contig_935671	126	100	68	0	0	22	69	51	5	4e-13
SNP_3575324	contig_71354	126	100	68	0	0	26	69	45	2	4e-13
SNP_4262058	contig_942171	126	100	68	0	0	25	68	48	5	4e-13
sil_1000638	contig_960617	122	98.55	69	1	0	41	69	29	1	2e-06
sil_1001587	contig_98154	122	98.55	69	1	0	39	67	350	378	2e-06
sil_1003626	contig_2205178	122	98.55	69	1	0	37	69	201	233	1e-08
sil_1003830	contig_945844	122	98.55	69	1	0	41	69	265	293	2e-06
sil_1006216	contig_2196651	128	100	69	0	0	37	69	209	241	1e-08
sil_1007236	contig_2200585	122	98.55	69	1	0	41	69	31	3	2e-06
sil_1008166	contig_915808	128	100	69	0	0	26	69	44	1	2e-11
sil_1009097	contig_75272	117	97.1	69	2	0	23	69	173	220	4e-08
sil_1013755	contig_907842	122	98.55	69	1	0	37	69	208	240	1e-08
sil_1014872	contig_2201889	122	98.55	69	1	0	34	69	191	226	1e-08
sil_1016226	contig_2253007	128	100	69	0	0	29	69	56	16	2e-11
sil_1016489	contig_2259973	128	100	69	0	0	29	69	162	202	2e-11
sil_1016529	contig_261299	122	98.55	69	1	0	31	69	40	3	2e-06
sil_1016681	contig_106415	122	98.55	69	1	0	41	69	720	748	2e-06
sil_1018217	contig_38447	122	98.55	69	1	0	41	69	35	7	2e-06
sil_1018354	contig_2379210	122	98.55	69	1	0	41	69	31	3	2e-06
sil_1018396	contig_972432	122	98.55	69	1	0	37	69	43	11	1e-08
sil_1018702	contig_74956	122	98.55	69	1	0	37	69	37	5	1e-08
sil_1019140	contig_927716	122	98.55	69	1	0	31	69	162	200	1e-08
sil_1019171	contig_11727	117	97.1	69	2	0	37	69	40	8	1e-08
sil_1019706	contig_932454	128	100	69	0	0	37	69	45	13	1e-08
sil_1019754	contig_1386170	128	100	69	0	0	37	69	194	226	1e-08
sil_1019882	contig_68833	128	100	69	0	0	26	69	194	238	2e-11
sil_1020335	contig_71148	122	98.55	69	1	0	41	69	681	709	2e-06
sil_1020490	contig_907118	122	98.55	69	1	0	37	69	530	562	1e-08
sil_1020586	contig_81092	122	98.55	69	1	0	37	69	829	861	1e-08
sil_1020854	contig_2199504	117	97.1	69	2	0	37	69	35	3	1e-08
sil_1021178	contig_2198633	117	97.1	69	2	0	37	69	33	1	1e-08
sil_1021322	contig_906575	115	97.1	69	1	1	41	69	174	202	2e-06
sil_1021341	contig_2197149	128	100	69	0	0	37	69	35	3	1e-08
sil_1021520	contig_22424	117	97.1	69	2	0	37	69	74	42	1e-08
sil_1021577	contig_924586	122	98.55	69	1	0	37	69	179	211	1e-08
sil_1021876	contig_935689	122	98.55	69	1	0	37	69	170	202	1e-08
sil_1021896	contig_703050	128	100	69	0	0	26	69	188	231	2e-11
sil_1022098	contig_2226712	117	97.1	69	2	0	34	69	36	2	4e-08
sil_1022129	contig_908557	128	100	69	0	0	29	69	188	228	2e-11
sil_1022665	contig_972586	117	97.1	69	2	0	38	69	32	1	4e-08
sil_1022729	contig_914271	122	98.55	69	1	0	33	68	194	229	1e-08
sil_1024978	contig_2226259	122	98.55	69	1	0	37	69	223	255	1e-08
sil_1025414	contig_13647	117	97.1	69	2	0	37	69	259	291	1e-08
sil_1025731	contig_80808	128	100	69	0	0	32	69	39	2	8e-10
sil_1026910	contig_712608	128	100	69	0	0	37	69	36	4	1e-08
sil_1027914	contig_1474614	122	98.55	69	1	0	37	69	43	11	1e-08
sil_1027956	contig_974880	122	98.55	69	1	0	41	69	289	317	2e-06
sil_1028502	contig_2381774	128	100	69	0	0	37	69	36	4	1e-08
sil_1029052	contig_911772	128	100	69	0	0	37	69	184	216	1e-08
sil_1031271	contig_917999	122	98.55	69	1	0	37	69	194	226	1e-08
sil_1031333	contig_927716	122	98.55	69	1	0	38	69	168	199	4e-08
sil_1031646	contig_2226588	122	98.55	69	1	0	37	68	32	1	4e-08
sil_1032104	contig_927299	117	97.1	69	2	0	31	69	43	6	4e-08
sil_1034344	contig_2201953	122	98.55	69	1	0	38	69	187	218	4e-08
sil_1034844	contig_111499	122	98.55	69	1	0	38	69	53	22	4e-08
sil_1035849	contig_1022154	122	98.55	69	1	0	41	69	566	594	2e-06
sil_1036713	contig_979804	122	98.55	69	1	0	41	69	36	8	2e-06
sil_1036754	contig_99004	128	100	69	0	0	38	69	49	18	4e-08
sil_1036865	contig_906810	122	98.55	69	1	0	35	69	39	4	4e-08
sil_1037522	contig_919378	128	100	69	0	0	38	69	181	212	4e-08
sil_1037552	contig_970163	128	100	69	0	0	26	69	49	6	2e-11
sil_1041112	contig_99801	128	100	69	0	0	29	69	191	231	2e-11
sil_1041226	contig_930544	128	100	69	0	0	29	69	57	17	2e-11
sil_1041418	contig_916201	128	100	69	0	0	25	69	155	198	2e-11
sil_1041496	contig_949358	121	98.55	69	0	1	29	69	42	2	2e-11
sil_1041557	contig_924904	128	100	69	0	0	38	69	33	2	4e-08
sil_1041563	contig_911361	128	100	69	0	0	26	69	173	216	2e-11
sil_1044076	contig_1159515	122	98.55	69	1	0	41	69	33	5	2e-06
sil_1045022	contig_904791	122	98.55	69	1	0	41	69	377	405	2e-06
sil_1045582	contig_73190	117	97.1	69	2	0	38	69	44	13	4e-08
sil_1045618	contig_124227	128	100	69	0	0	36	67	32	1	4e-08
sil_1046301	contig_70980	122	98.55	69	1	0	38	69	32	1	4e-08
sil_1047589	contig_2221502	128	100	69	0	0	29	69	62	22	2e-11
sil_1048004	contig_938323	122	98.55	69	1	0	38	69	42	11	4e-08
sil_1050007	contig_1072430	128	100	69	0	0	38	69	43	12	4e-08
sil_1050277	contig_948773	117	97.1	69	2	0	35	69	66	32	4e-08
sil_1051548	contig_1002716	128	100	69	0	0	38	69	36	5	4e-08
sil_1051802	contig_71231	122	98.55	69	1	0	37	68	32	1	4e-08
sil_1051851	contig_1260708	122	98.55	69	1	0	38	69	49	18	4e-08
sil_1053933	contig_78160	128	100	69	0	0	32	69	175	212	2e-11
sil_1054469	contig_916432	117	97.1	69	2	0	38	69	37	6	4e-08
sil_1054654	contig_918995	117	97.1	69	2	0	38	69	41	10	4e-08
sil_1054832	contig_70374	128	100	69	0	0	25	69	49	6	2e-11
sil_1054902	contig_927716	122	98.55	69	1	0	40	68	433	461	2e-06
sil_1055199	contig_938485	128	100	69	0	0	29	69	225	265	2e-11
sil_1055682	contig_10197	117	97.1	69	2	0	38	69	32	1	4e-08
sil_1056400	contig_78116	122	98.55	69	1	0	41	69	37	9	2e-06
sil_1056497	contig_1043836	117	97.1	69	2	0	38	69	37	6	4e-08
sil_1056555	contig_2204763	122	98.55	69	1	0	41	69	175	203	2e-06
sil_1056946	contig_925310	122	98.55	69	1	0	38	69	58	27	4e-08
sil_1057190	contig_2217005	122	98.55	69	1	0	38	69	36	5	4e-08
sil_1057384	contig_918367	122	98.55	69	1	0	38	69	55	24	4e-08
sil_1057454	contig_71347	117	97.1	69	2	0	14	69	81	31	4e-08
sil_1058073	contig_82273	117	97.1	69	2	0	38	69	56	25	4e-08
sil_1058300	contig_951493	128	100	69	0	0	29	69	45	5	2e-11
sil_1058403	contig_934270	122	98.55	69	1	0	37	68	383	414	4e-08
sil_1058766	contig_2197803	128	100	69	0	0	35	69	58	24	4e-08
sil_1059586	contig_2334228	128	100	69	0	0	38	69	32	1	4e-08
sil_1060162	contig_130324	128	100	69	0	0	38	69	36	5	4e-08
sil_1060714	contig_80597	117	97.1	69	2	0	35	69	382	416	4e-08
sil_1060737	contig_2203346	128	100	69	0	0	38	69	47	16	4e-08
sil_1060743	contig_981923	128	100	69	0	0	38	69	37	6	4e-08
sil_1060777	contig_505125	117	97.1	69	2	0	38	69	366	397	4e-08
sil_1060943	contig_2203338	117	97.1	69	2	0	38	69	265	296	4e-08
sil_1061794	contig_2307234	128	100	69	0	0	29	69	179	219	2e-11
sil_1061945	contig_2203457	122	98.55	69	1	0	38	69	44	13	4e-08
sil_1063095	contig_2201088	117	97.1	69	2	0	29	69	730	770	4e-08
sil_1063130	contig_920668	117	97.1	69	2	0	38	69	199	230	4e-08
sil_1063299	contig_95351	128	100	69	0	0	38	69	46	15	4e-08
sil_1064516	contig_2215876	128	100	69	0	0	23	69	51	5	2e-11
sil_1064932	contig_8237	117	97.1	69	2	0	38	69	52	21	4e-08
sil_1065154	contig_941485	122	98.55	69	1	0	41	69	640	668	2e-06
sil_1065414	contig_996174	122	98.55	69	1	0	38	69	48	17	4e-08
sil_1065650	contig_71761	128	100	69	0	0	35	69	36	2	4e-08
sil_1066964	contig_919348	128	100	69	0	0	38	69	39	8	4e-08
sil_1066996	contig_982397	117	97.1	69	2	0	38	69	36	5	4e-08
sil_1067085	contig_920189	128	100	69	0	0	38	69	34	3	4e-08
sil_1067398	contig_124322	128	100	69	0	0	29	69	194	234	2e-11
sil_1068144	contig_985497	128	100	69	0	0	23	69	219	265	2e-11
sil_1068597	contig_2202864	117	97.1	69	2	0	38	69	40	9	4e-08
sil_1069606	contig_957976	117	97.1	69	2	0	38	69	46	15	4e-08
sil_1069906	contig_913051	122	98.55	69	1	0	38	69	60	29	4e-08
sil_1070054	contig_109717	128	100	69	0	0	29	69	851	891	2e-11
sil_1070849	contig_18067	128	100	69	0	0	29	69	231	271	2e-11
sil_1071125	contig_2207585	117	97.1	69	2	0	38	69	720	751	4e-08
sil_1071222	contig_81324	128	100	69	0	0	29	69	269	309	2e-11
sil_1071569	contig_119311	128	100	69	0	0	29	69	181	221	2e-11
sil_1071860	contig_73395	128	100	69	0	0	29	69	47	7	2e-11
sil_1072102	contig_906279	122	98.55	69	1	0	38	69	42	11	4e-08
sil_1072366	contig_956251	128	100	69	0	0	38	69	591	622	4e-08
sil_1073010	contig_98939	128	100	69	0	0	26	69	209	253	2e-11
sil_1073448	contig_937205	128	100	69	0	0	29	69	64	23	4e-08
sil_1073964	contig_953742	117	97.1	69	2	0	38	69	35	4	4e-08
sil_1073995	contig_914153	128	100	69	0	0	34	69	48	14	4e-08
sil_1074096	contig_16066	128	100	69	0	0	26	69	180	224	2e-11
sil_1074654	contig_906574	128	100	69	0	0	38	69	35	4	4e-08
sil_1074803	contig_183919	117	97.1	69	2	0	38	69	35	4	4e-08
sil_1074973	contig_2346552	122	98.55	69	1	0	41	69	249	277	2e-06
sil_1075215	contig_909013	122	98.55	69	1	0	38	69	59	28	4e-08
sil_1075618	contig_905097	117	97.1	69	2	0	38	69	523	554	4e-08
sil_1076323	contig_2207713	122	98.55	69	1	0	41	69	37	9	2e-06
sil_1077814	contig_934421	122	98.55	69	1	0	41	69	878	906	2e-06
sil_1078002	contig_18480	117	97.1	69	2	0	38	69	566	597	4e-08
sil_1079093	contig_90835	128	100	69	0	0	29	69	43	3	2e-11
sil_1079096	contig_943496	128	100	69	0	0	29	69	163	203	2e-11
sil_1079496	contig_1228544	128	100	69	0	0	29	69	211	251	2e-11
sil_1080050	contig_2210639	122	98.55	69	1	0	38	69	33	2	4e-08
sil_1080633	contig_970389	128	100	69	0	0	38	69	40	9	4e-08
sil_1080756	contig_938621	128	100	69	0	0	37	68	32	1	4e-08
sil_1081569	contig_937835	122	98.55	69	1	0	41	69	45	17	2e-06
sil_1081579	contig_2208520	117	97.1	69	2	0	38	69	51	20	4e-08
sil_1081625	contig_76568	128	100	69	0	0	29	69	42	2	2e-11
sil_1081660	contig_920013	128	100	69	0	0	29	69	194	234	2e-11
sil_1081679	contig_915011	122	98.55	69	1	0	19	69	52	3	2e-06
sil_1081769	contig_925129	128	100	69	0	0	27	69	202	245	6e-11
sil_1081930	contig_945426	122	98.55	69	1	0	41	69	52	24	2e-06
sil_1084038	contig_947553	117	97.1	69	2	0	38	69	33	2	4e-08
sil_1084333	contig_1034960	117	97.1	69	2	0	35	69	42	7	4e-08
sil_1084598	contig_907271	117	97.1	69	2	0	19	67	51	1	4e-08
sil_1086636	contig_101291	122	98.55	69	1	0	38	69	191	222	4e-08
sil_1087662	contig_939957	117	97.1	69	2	0	38	69	36	5	4e-08
sil_1087987	contig_917156	128	100	69	0	0	38	69	35	4	4e-08
sil_1088497	contig_914301	122	98.55	69	1	0	41	69	795	823	2e-06
sil_1088535	contig_2223112	122	98.55	69	1	0	38	69	141	172	4e-08
sil_1088610	contig_996479	128	100	69	0	0	38	69	32	1	4e-08
sil_1088666	contig_989240	128	100	69	0	0	38	69	35	4	4e-08
sil_1088742	contig_2208113	128	100	69	0	0	27	69	49	6	6e-11
sil_1088743	contig_2205328	128	100	69	0	0	30	69	187	226	6e-11
sil_1089207	contig_924529	117	97.1	69	2	0	38	69	33	2	4e-08
sil_1089237	contig_932793	117	97.1	69	2	0	38	69	377	408	4e-08
sil_1089263	contig_91709	117	97.1	69	2	0	14	69	77	22	4e-08
sil_1089467	contig_974186	117	97.1	69	2	0	38	69	37	6	4e-08
sil_1089688	contig_935884	128	100	69	0	0	31	69	50	14	4e-08
sil_1089724	contig_977408	115	97.1	69	1	1	41	69	38	10	2e-06
sil_1090129	contig_908060	128	100	69	0	0	35	69	47	12	4e-08
sil_1090911	contig_913051	117	97.1	69	2	0	38	69	38	7	4e-08
sil_1091102	contig_1168005	117	97.1	69	2	0	38	69	47	16	4e-08
sil_1091303	contig_84799	128	100	69	0	0	23	69	59	14	6e-11
sil_1091442	contig_2202064	122	98.55	69	1	0	41	69	56	28	2e-06
sil_1091666	contig_2277202	122	98.55	69	1	0	40	68	29	1	2e-06
sil_1091680	contig_2198988	122	98.55	69	1	0	41	69	37	9	2e-06
sil_1091853	contig_906575	122	98.55	69	1	0	41	69	40	12	2e-06
sil_1091880	contig_911149	128	100	69	0	0	30	69	49	10	6e-11
sil_1091924	contig_917862	122	98.55	69	1	0	41	69	29	1	2e-06
sil_1091952	contig_72345	117	97.1	69	2	0	38	69	45	14	4e-08
sil_1092072	contig_1010509	122	98.55	69	1	0	31	69	43	7	2e-06
sil_1092111	contig_932898	128	100	69	0	0	30	69	181	220	6e-11
sil_1092336	contig_81394	128	100	69	0	0	30	69	44	5	6e-11
sil_1092344	contig_908060	128	100	69	0	0	38	69	33	2	4e-08
sil_1092360	contig_921140	128	100	69	0	0	27	69	52	10	6e-11
sil_1092690	contig_955622	128	100	69	0	0	30	69	42	3	6e-11
sil_1092775	contig_2206417	122	98.55	69	1	0	39	67	29	1	2e-06
sil_1092824	contig_994654	122	98.55	69	1	0	41	69	30	2	2e-06
sil_1092886	contig_13445	128	100	69	0	0	20	69	185	232	6e-11
sil_1092960	contig_957174	122	98.55	69	1	0	41	69	45	17	2e-06
sil_1093120	contig_14094	117	97.1	69	2	0	38	69	52	21	4e-08
sil_1093288	contig_967139	128	100	69	0	0	30	69	40	1	6e-11
sil_1093497	contig_2203746	122	98.55	69	1	0	41	69	162	190	2e-06
sil_1093596	contig_927076	128	100	69	0	0	38	69	51	20	4e-08
sil_1094279	contig_1012017	122	98.55	69	1	0	41	69	33	5	2e-06
sil_1094507	contig_106091	117	97.1	69	2	0	38	69	795	826	4e-08
sil_1094537	contig_73378	117	97.1	69	2	0	35	69	452	486	4e-08
sil_1094668	contig_155177	117	97.1	69	2	0	38	69	32	1	4e-08
sil_1094971	contig_2223112	128	100	69	0	0	35	69	40	5	4e-08
sil_1095034	contig_2221785	122	98.55	69	1	0	41	69	182	210	2e-06
sil_1095302	contig_962474	128	100	69	0	0	38	69	209	240	4e-08
sil_1095486	contig_912424	122	98.55	69	1	0	12	69	74	21	4e-08
sil_1095527	contig_913297	121	98.55	69	0	1	24	69	53	8	6e-11
sil_1096506	contig_909393	117	97.1	69	2	0	38	69	56	25	4e-08
sil_1096567	contig_124008	122	98.55	69	1	0	28	69	49	10	4e-08
sil_1096913	contig_2202740	122	98.55	69	1	0	41	69	188	216	2e-06
sil_1097706	contig_96580	122	98.55	69	1	0	38	69	222	253	4e-08
sil_1098195	contig_2202479	122	98.55	69	1	0	41	69	166	194	2e-06
sil_1098345	contig_905784	122	98.55	69	1	0	41	69	56	28	2e-06
sil_1099312	contig_1424224	128	100	69	0	0	28	67	40	1	6e-11
sil_1099602	contig_932481	122	98.55	69	1	0	41	69	35	7	2e-06
sil_1100056	contig_2214110	122	98.55	69	1	0	38	69	51	20	4e-08
sil_1100603	contig_916734	122	98.55	69	1	0	38	69	36	5	4e-08
sil_1101167	contig_950028	128	100	69	0	0	30	69	43	4	6e-11
sil_1101339	contig_918031	122	98.55	69	1	0	41	69	203	231	2e-06
sil_1101880	contig_942108	128	100	69	0	0	38	69	33	2	4e-08
sil_1102024	contig_930655	128	100	69	0	0	38	69	36	5	4e-08
sil_1102632	contig_968656	128	100	69	0	0	30	69	49	10	6e-11
sil_1103094	contig_2201822	117	97.1	69	2	0	26	68	45	1	4e-08
sil_1103499	contig_940406	128	100	69	0	0	27	69	46	4	6e-11
sil_1103538	contig_335707	128	100	69	0	0	38	69	45	14	4e-08
sil_1103761	contig_40713	128	100	69	0	0	38	69	44	13	4e-08
sil_1103888	contig_914310	128	100	69	0	0	38	69	48	17	4e-08
sil_1104020	contig_2223112	128	100	69	0	0	38	69	32	1	4e-08
sil_1104821	contig_904594	122	98.55	69	1	0	41	69	30	2	2e-06
sil_1104964	contig_2198755	122	98.55	69	1	0	41	69	179	207	2e-06
sil_1105182	contig_990087	122	98.55	69	1	0	41	69	37	9	2e-06
sil_1105315	contig_2207116	128	100	69	0	0	38	69	33	2	4e-08
sil_1105417	contig_957053	117	97.1	69	2	0	38	69	37	6	4e-08
sil_1105575	contig_10800	128	100	69	0	0	38	69	57	26	4e-08
sil_1106001	contig_1006131	122	98.55	69	1	0	41	69	31	3	2e-06
sil_1106161	contig_917740	117	97.1	69	2	0	38	69	40	9	4e-08
sil_1106389	contig_2198452	122	98.55	69	1	0	35	69	224	258	4e-08
sil_1106995	contig_9041	128	100	69	0	0	27	69	46	3	6e-11
sil_1107025	contig_983925	128	100	69	0	0	30	69	58	19	6e-11
sil_1107187	contig_78379	128	100	69	0	0	27	69	59	16	6e-11
sil_1107213	contig_2217287	117	97.1	69	2	0	25	69	50	7	4e-08
sil_1107245	contig_991357	128	100	69	0	0	30	69	56	17	6e-11
sil_1107525	contig_11515	128	100	69	0	0	29	68	40	1	6e-11
sil_1108273	contig_914456	117	97.1	69	2	0	38	69	40	9	4e-08
sil_1108323	contig_914781	117	97.1	69	2	0	31	69	38	2	4e-08
sil_1108344	contig_2200131	128	100	69	0	0	38	69	217	248	4e-08
sil_1108448	contig_2201822	117	97.1	69	2	0	24	68	44	1	4e-08
sil_1108568	contig_13486	128	100	69	0	0	38	69	279	310	4e-08
sil_1108575	contig_914276	128	100	69	0	0	30	69	44	5	6e-11
sil_1108705	contig_2274340	117	97.1	69	2	0	32	69	41	4	4e-08
sil_1108724	contig_977322	122	98.55	69	1	0	41	69	50	22	2e-06
sil_1109265	contig_70590	122	98.55	69	1	0	38	69	45	14	4e-08
sil_1109717	contig_1016958	128	100	69	0	0	27	69	50	7	6e-11
sil_1110346	contig_904582	122	98.55	69	1	0	41	69	175	203	2e-06
sil_1110368	contig_975234	122	98.55	69	1	0	41	69	35	7	2e-06
sil_1110446	contig_2206252	122	98.55	69	1	0	41	69	49	21	2e-06
sil_1110470	contig_81751	128	100	69	0	0	38	69	207	238	4e-08
sil_1110566	contig_2208401	128	100	69	0	0	30	69	52	13	6e-11
sil_1110722	contig_127621	128	100	69	0	0	30	69	48	9	6e-11
sil_1110787	contig_8669	128	100	69	0	0	27	69	49	7	6e-11
sil_1111100	contig_1046069	122	98.55	69	1	0	38	69	48	17	4e-08
sil_1111438	contig_1003159	122	98.55	69	1	0	41	69	177	205	2e-06
sil_1111590	contig_918147	128	100	69	0	0	30	69	46	7	6e-11
sil_1111895	contig_71118	128	100	69	0	0	30	69	60	21	6e-11
sil_1111943	contig_1519861	115	97.1	69	1	1	40	68	29	1	2e-06
sil_1111988	contig_114649	122	98.55	69	1	0	41	69	200	228	2e-06
sil_1112250	contig_2210020	122	98.55	69	1	0	41	69	201	229	2e-06
sil_1113481	contig_2208966	128	100	69	0	0	30	69	44	5	6e-11
sil_1113676	contig_2201495	122	98.55	69	1	0	41	69	209	237	2e-06
sil_1114034	contig_73653	117	97.1	69	2	0	31	69	1592	1628	4e-08
sil_1114218	contig_947367	128	100	69	0	0	30	69	42	3	6e-11
sil_1114336	contig_976219	128	100	69	0	0	38	69	48	17	4e-08
sil_1114464	contig_127438	128	100	69	0	0	30	69	591	630	6e-11
sil_1114572	contig_923070	128	100	69	0	0	38	69	46	15	4e-08
sil_1114630	contig_964364	128	100	69	0	0	38	69	34	3	4e-08
sil_1115146	contig_917837	117	97.1	69	2	0	21	69	4003	4048	4e-08
sil_1115228	contig_105682	122	98.55	69	1	0	41	69	196	224	2e-06
sil_1115438	contig_10908	128	100	69	0	0	30	69	51	12	6e-11
sil_1115656	contig_2217287	117	97.1	69	2	0	34	69	48	14	4e-08
sil_1116022	contig_80471	122	98.55	69	1	0	41	69	179	207	2e-06
sil_1116118	contig_2213235	128	100	69	0	0	28	69	201	240	4e-08
sil_1117006	contig_71042	128	100	69	0	0	30	69	141	180	6e-11
sil_1117708	contig_910858	128	100	69	0	0	38	69	226	257	4e-08
sil_1119401	contig_961913	128	100	69	0	0	27	69	56	14	6e-11
sil_1119419	contig_942597	122	98.55	69	1	0	41	69	38	10	2e-06
sil_1119780	contig_2198725	122	98.55	69	1	0	41	69	43	15	2e-06
sil_1119839	contig_927167	122	98.55	69	1	0	41	69	197	225	2e-06
sil_1119916	contig_10663	122	98.55	69	1	0	38	69	37	6	4e-08
sil_1120094	contig_932813	122	98.55	69	1	0	41	69	37	9	2e-06
sil_1120199	contig_2214470	122	98.55	69	1	0	41	69	196	224	2e-06
sil_1120552	contig_920034	128	100	69	0	0	30	69	47	8	6e-11
sil_1120764	contig_988463	122	98.55	69	1	0	41	69	179	207	2e-06
sil_1120785	contig_2208966	128	100	69	0	0	30	69	51	12	6e-11
sil_1122065	contig_905814	128	100	69	0	0	38	69	46	15	4e-08
sil_1122089	contig_9314	122	98.55	69	1	0	41	69	31	3	2e-06
sil_1122100	contig_2209433	128	100	69	0	0	30	69	153	192	6e-11
sil_1122127	contig_2208864	128	100	69	0	0	38	69	42	11	4e-08
sil_1122236	contig_1982446	122	98.55	69	1	0	41	69	32	4	2e-06
sil_1122676	contig_24852	128	100	69	0	0	30	69	58	19	6e-11
sil_1123638	contig_907537	122	98.55	69	1	0	38	69	44	13	4e-08
sil_1124675	contig_88240	128	100	69	0	0	35	69	39	5	4e-08
sil_1124948	contig_11844	128	100	69	0	0	38	69	58	27	4e-08
sil_1124961	contig_23443	122	98.55	69	1	0	41	69	221	249	2e-06
sil_1125065	contig_10823	122	98.55	69	1	0	41	69	40	12	2e-06
sil_1125220	contig_957040	117	97.1	69	2	0	38	69	42	11	4e-08
sil_1125279	contig_2203346	128	100	69	0	0	37	68	32	1	4e-08
sil_1125325	contig_923611	128	100	69	0	0	30	69	47	8	6e-11
sil_1125482	contig_907931	117	97.1	69	2	0	38	69	188	219	4e-08
sil_1125563	contig_85816	128	100	69	0	0	38	69	35	4	4e-08
sil_1125650	contig_51181	128	100	69	0	0	27	69	50	8	6e-11
sil_1125744	contig_93916	128	100	69	0	0	38	69	41	10	4e-08
sil_1125959	contig_2224553	122	98.55	69	1	0	41	69	45	17	2e-06
sil_1126106	contig_995618	122	98.55	69	1	0	40	68	177	205	2e-06
sil_1126877	contig_953820	122	98.55	69	1	0	38	69	48	17	2e-06
sil_1127071	contig_980295	117	97.1	69	2	0	38	69	500	531	4e-08
sil_1127387	contig_1377185	117	97.1	69	2	0	41	69	39	11	2e-06
sil_1127434	contig_71699	117	97.1	69	2	0	38	69	166	197	4e-08
sil_1127437	contig_1001397	122	98.55	69	1	0	38	69	386	417	4e-08
sil_1127702	contig_99167	128	100	69	0	0	30	69	158	197	6e-11
sil_1127715	contig_12230	128	100	69	0	0	38	69	213	244	4e-08
sil_1127879	contig_915176	122	98.55	69	1	0	38	69	52	21	4e-08
sil_1128058	contig_938162	128	100	69	0	0	30	69	209	248	6e-11
sil_1128415	contig_938076	122	98.55	69	1	0	38	69	39	8	4e-08
sil_1129308	contig_71918	128	100	69	0	0	35	69	36	1	4e-08
sil_1129436	contig_980162	128	100	69	0	0	29	68	40	1	6e-11
sil_1129546	contig_71371	117	97.1	69	2	0	38	69	422	453	4e-08
sil_1129613	contig_911517	122	98.55	69	1	0	38	69	46	15	4e-08
sil_1129820	contig_963199	128	100	69	0	0	30	69	222	261	6e-11
sil_1130982	contig_936842	128	100	69	0	0	38	69	294	325	4e-08
sil_1131088	contig_2197794	128	100	69	0	0	27	69	198	241	6e-11
sil_1131789	contig_81477	128	100	69	0	0	27	69	294	336	6e-11
sil_1132002	contig_70331	128	100	69	0	0	30	69	63	24	6e-11
sil_1133018	contig_2199057	122	98.55	69	1	0	38	69	57	26	4e-08
sil_1133160	contig_12517	117	97.1	69	2	0	35	69	411	445	4e-08
sil_1136271	contig_954805	117	97.1	69	2	0	38	69	35	4	4e-08
sil_1136296	contig_943805	122	98.55	69	1	0	41	69	194	222	2e-06
sil_1136456	contig_18265	128	100	69	0	0	38	69	45	14	4e-08
sil_1137728	contig_1154826	128	100	69	0	0	30	69	51	12	6e-11
sil_1137974	contig_928583	128	100	69	0	0	30	69	45	6	6e-11
sil_1138109	contig_8471	128	100	69	0	0	30	69	44	5	6e-11
sil_1138786	contig_1000920	117	97.1	69	2	0	35	69	39	5	4e-08
sil_1138882	contig_2202429	117	97.1	69	2	0	38	69	49	18	4e-08
sil_1138883	contig_9670	128	100	69	0	0	38	69	33	2	4e-08
sil_1138894	contig_95039	128	100	69	0	0	30	69	206	245	6e-11
sil_1139147	contig_920696	128	100	69	0	0	30	69	48	9	6e-11
sil_1140065	contig_2213606	128	100	69	0	0	30	69	75	36	6e-11
sil_1140543	contig_2199504	117	97.1	69	2	0	38	69	60	29	4e-08
sil_1142997	contig_71746	122	98.55	69	1	0	38	69	262	293	4e-08
sil_1143181	contig_2208598	122	98.55	69	1	0	41	69	31	3	2e-06
sil_1143366	contig_2204326	122	98.55	69	1	0	38	69	247	278	4e-08
sil_1147720	contig_938435	122	98.55	69	1	0	38	69	36	5	4e-08
sil_1150049	contig_2206996	128	100	69	0	0	38	69	44	13	4e-08
sil_1150691	contig_71548	128	100	69	0	0	30	69	57	18	6e-11
sil_1152962	contig_2203637	122	98.55	69	1	0	38	69	33	2	4e-08
sil_1156253	contig_81273	128	100	69	0	0	27	69	57	15	6e-11
sil_1159301	contig_2200094	117	97.1	69	2	0	38	69	238	269	4e-08
sil_1163079	contig_2220104	122	98.55	69	1	0	38	69	272	303	4e-08
sil_1164004	contig_907180	117	97.1	69	2	0	31	69	69	32	4e-08
sil_1165327	contig_2208307	122	98.55	69	1	0	38	69	33	2	4e-08
sil_1165803	contig_2210202	117	97.1	69	2	0	38	69	36	5	4e-08
sil_1173687	contig_95044	117	97.1	69	2	0	38	69	35	4	4e-08
sil_1176591	contig_2204369	117	97.1	69	2	0	38	69	40	9	4e-08
sil_1179773	contig_909786	128	100	69	0	0	38	69	32	1	4e-08
sil_1183335	contig_1058469	128	100	69	0	0	38	69	33	2	4e-08
sil_1194975	contig_2201422	128	100	69	0	0	30	69	40	1	6e-11
sil_1195570	contig_13794	117	97.1	69	2	0	38	69	49	18	4e-08
sil_1197431	contig_912232	128	100	69	0	0	30	69	279	318	6e-11
sil_1197944	contig_2226682	122	98.55	69	1	0	41	69	171	199	2e-06
sil_1199266	contig_2236810	128	100	69	0	0	30	69	45	6	6e-11
sil_1201593	contig_916528	122	98.55	69	1	0	41	69	56	28	2e-06
sil_1201624	contig_2196807	117	97.1	69	2	0	38	69	177	208	4e-08
sil_1201639	contig_140645	122	98.55	69	1	0	41	69	37	9	2e-06
sil_1202048	contig_79792	122	98.55	69	1	0	41	69	851	879	2e-06
sil_1202445	contig_919325	128	100	69	0	0	30	69	48	9	6e-11
sil_1203262	contig_938621	128	100	69	0	0	38	69	447	478	4e-08
sil_1204105	contig_2201755	122	98.55	69	1	0	38	69	224	255	4e-08
sil_1204433	contig_906497	128	100	69	0	0	38	69	302	333	4e-08
sil_1204782	contig_916765	122	98.55	69	1	0	38	69	46	15	4e-08
sil_1204942	contig_939387	122	98.55	69	1	0	41	69	530	558	2e-06
sil_1205826	contig_990287	128	100	69	0	0	30	69	275	314	6e-11
sil_1206288	contig_2197243	117	97.1	69	2	0	38	69	32	1	4e-08
sil_1206733	contig_2352225	128	100	69	0	0	30	69	48	9	6e-11
sil_1207102	contig_917111	128	100	69	0	0	30	69	46	7	6e-11
sil_1208130	contig_71812	117	97.1	69	2	0	38	69	38	7	4e-08
sil_1208214	contig_75676	128	100	69	0	0	38	69	294	325	4e-08
sil_1208362	contig_2215419	117	97.1	69	2	0	38	69	54	23	4e-08
sil_1208492	contig_906497	128	100	69	0	0	38	69	245	276	4e-08
sil_1208954	contig_917281	128	100	69	0	0	30	69	226	265	6e-11
sil_1209458	contig_923159	122	98.55	69	1	0	41	69	486	514	2e-06
sil_1209925	contig_934278	117	97.1	69	2	0	38	69	200	231	4e-08
sil_1209959	contig_2197238	122	98.55	69	1	0	38	69	340	371	4e-08
sil_1210028	contig_935557	128	100	69	0	0	38	69	734	765	4e-08
sil_1210127	contig_72135	122	98.55	69	1	0	41	69	829	857	2e-06
sil_1211213	contig_2203839	122	98.55	69	1	0	41	69	35	7	2e-06
sil_1211516	contig_919165	122	98.55	69	1	0	41	69	33	5	2e-06
sil_1211874	contig_2213152	128	100	69	0	0	26	69	48	6	6e-11
sil_1213561	contig_2205473	117	97.1	69	2	0	38	69	518	549	4e-08
sil_1214744	contig_973676	128	100	69	0	0	27	69	46	4	6e-11
sil_1215377	contig_943944	117	97.1	69	2	0	38	69	53	22	4e-08
sil_1215739	contig_8421	122	98.55	69	1	0	38	69	32	1	4e-08
sil_1215749	contig_80597	128	100	69	0	0	30	69	40	1	6e-11
sil_1215828	contig_2199388	117	97.1	69	2	0	35	69	211	245	4e-08
sil_1215979	contig_916268	128	100	69	0	0	38	69	42	11	4e-08
sil_1216097	contig_947974	128	100	69	0	0	27	69	51	9	6e-11
sil_1216164	contig_71867	117	97.1	69	2	0	38	69	201	232	4e-08
sil_1216236	contig_13647	122	98.55	69	1	0	38	69	321	352	4e-08
sil_1217056	contig_933972	122	98.55	69	1	0	38	69	221	252	4e-08
sil_1217265	contig_98903	128	100	69	0	0	30	69	323	362	6e-11
sil_1218068	contig_98410	122	98.55	69	1	0	41	69	35	7	2e-06
sil_1218372	contig_77843	128	100	69	0	0	35	69	42	8	4e-08
sil_1218570	contig_70252	117	97.1	69	2	0	35	69	58	24	4e-08
sil_1218614	contig_2203346	128	100	69	0	0	38	69	225	256	4e-08
sil_1219162	contig_84225	128	100	69	0	0	26	69	195	237	6e-11
sil_1219561	contig_1431725	122	98.55	69	1	0	41	69	170	198	2e-06
sil_1219627	contig_16413	122	98.55	69	1	0	41	69	191	219	2e-06
sil_1220229	contig_2230078	122	98.55	69	1	0	41	69	223	251	2e-06
sil_1220449	contig_14627	128	100	69	0	0	27	69	48	5	6e-11
sil_1220680	contig_11006	128	100	69	0	0	27	69	45	2	6e-11
sil_1220860	contig_81030	122	98.55	69	1	0	38	69	316	347	4e-08
sil_1221051	contig_1271696	128	100	69	0	0	30	69	46	7	6e-11
sil_1221299	contig_2202054	122	98.55	69	1	0	38	69	40	9	4e-08
sil_1222211	contig_924785	128	100	69	0	0	38	69	872	903	4e-08
sil_1222924	contig_2199816	122	98.55	69	1	0	38	69	37	6	4e-08
sil_1224449	contig_905982	122	98.55	69	1	0	41	69	237	265	2e-06
sil_1225372	contig_2196753	128	100	69	0	0	27	69	46	3	6e-11
sil_1226966	contig_2217639	128	100	69	0	0	30	69	44	5	6e-11
sil_1227363	contig_10976	128	100	69	0	0	27	69	51	8	6e-11
sil_1228010	contig_955079	122	98.55	69	1	0	41	69	269	297	2e-06
sil_1228079	contig_916343	128	100	69	0	0	24	69	264	309	6e-11
sil_1228176	contig_1002003	128	100	69	0	0	30	69	58	19	6e-11
sil_1228444	contig_926079	117	97.1	69	2	0	38	69	209	240	4e-08
sil_1228588	contig_13504	122	98.55	69	1	0	38	69	517	548	4e-08
sil_1228667	contig_120719	122	98.55	69	1	0	38	69	33	2	4e-08
sil_1228704	contig_906768	128	100	69	0	0	38	69	194	225	4e-08
sil_1228728	contig_82201	122	98.55	69	1	0	41	69	263	291	2e-06
sil_1228792	contig_935614	117	97.1	69	2	0	38	69	208	239	4e-08
sil_1228932	contig_2225556	122	98.55	69	1	0	41	69	259	287	2e-06
sil_1230905	contig_93118	122	98.55	69	1	0	41	69	36	8	2e-06
sil_1231255	contig_2206505	128	100	69	0	0	30	69	42	3	6e-11
sil_1232260	contig_919176	122	98.55	69	1	0	38	69	40	9	4e-08
sil_1232596	contig_17414	122	98.55	69	1	0	35	69	214	248	4e-08
sil_1233269	contig_935283	117	97.1	69	2	0	38	69	196	227	4e-08
sil_1233284	contig_105588	128	100	69	0	0	30	69	41	2	6e-11
sil_1233432	contig_983925	128	100	69	0	0	24	69	415	460	6e-11
sil_1233521	contig_71031	117	97.1	69	2	0	32	69	52	15	4e-08
sil_1234897	contig_917345	128	100	69	0	0	27	69	293	335	6e-11
sil_1235784	contig_905880	122	98.55	69	1	0	35	69	244	279	4e-08
sil_1236192	contig_86060	128	100	69	0	0	38	69	430	461	4e-08
sil_1236483	contig_104634	128	100	69	0	0	30	69	500	539	6e-11
sil_1236852	contig_22035	128	100	69	0	0	27	69	209	252	6e-11
sil_1237038	contig_21549	115	97.1	69	1	1	38	69	55	24	4e-08
sil_1237314	contig_925674	122	98.55	69	1	0	41	69	211	239	2e-06
sil_1237463	contig_15668	128	100	69	0	0	30	69	52	13	6e-11
sil_1238025	contig_917882	122	98.55	69	1	0	38	69	268	299	4e-08
sil_1239583	contig_1009031	117	97.1	69	2	0	35	69	36	1	4e-08
sil_1240023	contig_77912	122	98.55	69	1	0	41	69	66	38	2e-06
sil_1241426	contig_922051	128	100	69	0	0	38	69	33	2	4e-08
sil_1243888	contig_992952	117	97.1	69	2	0	38	69	542	573	4e-08
sil_1246914	contig_928432	122	98.55	69	1	0	38	69	45	14	4e-08
sil_1247087	contig_8015	117	97.1	69	2	0	38	69	51	20	4e-08
sil_1247172	contig_976082	122	98.55	69	1	0	41	69	29	1	2e-06
sil_1247299	contig_957053	122	98.55	69	1	0	38	69	648	679	4e-08
sil_1250328	contig_27810	128	100	69	0	0	30	69	422	461	6e-11
sil_1252873	contig_484233	128	100	69	0	0	38	69	271	302	4e-08
sil_1254549	contig_22991	128	100	69	0	0	38	69	270	301	4e-08
sil_1254605	contig_1154826	122	98.55	69	1	0	41	69	288	316	2e-06
sil_1254927	contig_132376	128	100	69	0	0	27	69	50	7	6e-11
sil_1255122	contig_2218181	117	97.1	69	2	0	38	69	38	7	4e-08
sil_1258198	contig_72049	128	100	69	0	0	38	69	328	359	4e-08
sil_1259138	contig_938377	122	98.55	69	1	0	41	69	58	30	2e-06
sil_1259170	contig_925911	128	100	69	0	0	38	69	36	5	4e-08
sil_1261462	contig_73653	122	98.55	69	1	0	38	69	56	25	4e-08
sil_1261601	contig_104977	122	98.55	69	1	0	38	69	32	1	4e-08
sil_1261774	contig_2220086	128	100	69	0	0	27	69	45	3	6e-11
sil_1262006	contig_1024949	128	100	69	0	0	30	69	294	333	6e-11
sil_1262031	contig_937001	117	97.1	69	2	0	35	69	38	4	4e-08
sil_1264714	contig_71399	122	98.55	69	1	0	41	69	41	13	2e-06
sil_1265409	contig_1304686	122	98.55	69	1	0	41	69	50	22	2e-06
sil_1265502	contig_905427	117	97.1	69	2	0	35	69	453	487	4e-08
sil_1266684	contig_909304	122	98.55	69	1	0	41	69	183	211	2e-06
sil_1267032	contig_913915	128	100	69	0	0	27	69	61	18	6e-11
sil_1267539	contig_928456	128	100	69	0	0	27	69	541	583	6e-11
sil_1267664	contig_923389	122	98.55	69	1	0	38	69	44	13	4e-08
sil_1267875	contig_1020445	128	100	69	0	0	30	69	45	6	6e-11
sil_1267930	contig_955587	117	97.1	69	2	0	38	69	648	679	4e-08
sil_1268829	contig_2213152	128	100	69	0	0	30	69	49	10	6e-11
sil_1268917	contig_978732	128	100	69	0	0	30	69	262	301	6e-11
sil_1269339	contig_912109	128	100	69	0	0	30	69	247	286	6e-11
sil_1269709	contig_2196712	128	100	69	0	0	38	69	314	345	4e-08
sil_1270119	contig_919165	128	100	69	0	0	38	69	53	22	4e-08
sil_1270243	contig_945473	128	100	69	0	0	38	69	60	29	4e-08
sil_1272166	contig_1884151	122	98.55	69	1	0	35	69	38	4	4e-08
sil_1273271	contig_910186	128	100	69	0	0	38	69	34	3	4e-08
sil_1274473	contig_925146	122	98.55	69	1	0	38	69	45	14	4e-08
sil_1274793	contig_973122	122	98.55	69	1	0	38	69	66	35	4e-08
sil_1275095	contig_1126448	117	97.1	69	2	0	38	69	43	12	4e-08
sil_1275278	contig_125219	117	97.1	69	2	0	38	69	652	683	4e-08
sil_1275588	contig_913212	128	100	69	0	0	38	69	35	4	4e-08
sil_1277486	contig_9319	122	98.55	69	1	0	38	69	53	22	4e-08
sil_1278415	contig_71519	128	100	69	0	0	38	69	32	1	4e-08
sil_1278449	contig_976100	128	100	69	0	0	38	69	34	3	4e-08
sil_1278921	contig_81477	128	100	69	0	0	38	69	9302	9333	4e-08
sil_1279346	contig_2287117	128	100	69	0	0	38	69	2260	2291	4e-08
sil_1279369	contig_930300	128	100	69	0	0	38	69	3462	3493	4e-08
sil_1280130	contig_94221	117	97.1	69	2	0	34	69	49	15	4e-08
sil_1280197	contig_915874	128	100	69	0	0	30	69	44	5	6e-11
sil_1281554	contig_2314931	122	98.55	69	1	0	38	69	32	1	4e-08
sil_1282324	contig_1838637	128	100	69	0	0	38	69	59	28	4e-08
sil_1282392	contig_2224413	128	100	69	0	0	30	69	272	311	6e-11
sil_1283361	contig_1608055	128	100	69	0	0	35	69	187	222	4e-08
sil_1285725	contig_1219888	128	100	69	0	0	30	69	40	1	6e-11
sil_1285887	contig_12016	122	98.55	69	1	0	38	69	169	200	4e-08
sil_1286859	contig_965248	122	98.55	69	1	0	38	69	176	207	4e-08
sil_1290104	contig_9128	122	98.55	69	1	0	25	69	178	221	4e-08
sil_1291909	contig_1097822	122	98.55	69	1	0	41	69	33	5	2e-06
sil_1293074	contig_909511	128	100	69	0	0	30	69	342	381	6e-11
sil_1294217	contig_14006	128	100	69	0	0	38	69	42	11	4e-08
sil_1296902	contig_2196781	128	100	69	0	0	30	69	447	486	6e-11
sil_1299124	contig_908082	115	97.1	69	0	1	29	69	210	250	2e-11
sil_1299160	contig_923611	128	100	69	0	0	30	69	224	263	6e-11
sil_1302686	contig_2199266	128	100	69	0	0	38	69	46	15	4e-08
sil_1303807	contig_915998	122	98.55	69	1	0	41	69	43	15	2e-06
sil_1304794	contig_76394	128	100	69	0	0	26	69	299	341	6e-11
sil_1305366	contig_2206137	117	97.1	69	2	0	38	69	196	227	4e-08
sil_1308598	contig_934343	128	100	69	0	0	25	69	58	15	4e-08
sil_1309422	contig_96289	122	98.55	69	1	0	38	69	35	4	4e-08
sil_1310861	contig_920999	117	97.1	69	2	0	29	69	46	5	4e-08
sil_1311167	contig_86603	128	100	69	0	0	38	69	165	196	4e-08
sil_1313648	contig_919876	117	97.1	69	2	0	38	69	32	1	4e-08
sil_1313976	contig_79687	117	97.1	69	2	0	38	69	40	9	4e-08
sil_1314329	contig_1563272	128	100	69	0	0	35	69	38	4	4e-08
sil_1314920	contig_929835	121	98.55	69	0	1	37	69	36	4	1e-08
sil_1315025	contig_73253	128	100	69	0	0	38	69	63	32	4e-08
sil_1315376	contig_11168	122	98.55	69	1	0	38	69	46	15	4e-08
sil_1315663	contig_913170	122	98.55	69	1	0	38	69	32	1	4e-08
sil_1317008	contig_2206340	122	98.55	69	1	0	41	69	36	8	2e-06
sil_1321186	contig_72109	122	98.55	69	1	0	41	69	29	1	2e-06
sil_1321658	contig_74061	122	98.55	69	1	0	41	69	163	191	2e-06
sil_1323838	contig_1005721	128	100	69	0	0	38	69	49	18	4e-08
sil_1327154	contig_11971	117	97.1	69	2	0	35	69	201	235	4e-08
sil_1333076	contig_95175	128	100	69	0	0	30	69	41	2	6e-11
sil_1343247	contig_103164	128	100	69	0	0	30	69	46	7	6e-11
sil_1352001	contig_72282	122	98.55	69	1	0	33	67	35	1	4e-08
sil_1353134	contig_2208651	122	98.55	69	1	0	38	69	45	14	4e-08
sil_1353189	contig_905639	128	100	69	0	0	38	69	32	1	4e-08
sil_1356746	contig_127737	128	100	69	0	0	35	69	38	4	4e-08
sil_1360007	contig_21445	122	98.55	69	1	0	41	69	197	225	2e-06
sil_1363307	contig_18997	117	97.1	69	2	0	38	69	45	14	4e-08
sil_1367737	contig_989004	122	98.55	69	1	0	41	69	211	239	2e-06
sil_1367746	contig_925180	128	100	69	0	0	27	69	47	4	6e-11
sil_1371426	contig_1199174	128	100	69	0	0	38	69	57	26	4e-08
sil_1372110	contig_104634	122	98.55	69	1	0	38	69	179	210	4e-08
sil_1380482	contig_2210034	122	98.55	69	1	0	38	69	42	11	4e-08
sil_1380520	contig_913081	128	100	69	0	0	38	69	184	215	4e-08
sil_1381088	contig_162448	128	100	69	0	0	35	69	165	200	4e-08
sil_1382603	contig_2206135	122	98.55	69	1	0	38	69	65	34	4e-08
sil_1383478	contig_70636	128	100	69	0	0	26	69	57	15	6e-11
sil_1384035	contig_925874	122	98.55	69	1	0	41	69	231	259	2e-06
sil_1384140	contig_930655	128	100	69	0	0	38	69	35	4	4e-08
sil_1384991	contig_915771	122	98.55	69	1	0	38	69	38	7	4e-08
sil_1385652	contig_2205854	122	98.55	69	1	0	41	69	184	212	2e-06
sil_1387129	contig_256724	122	98.55	69	1	0	41	69	194	222	2e-06
sil_1388018	contig_929998	128	100	69	0	0	29	68	720	759	6e-11
sil_1388548	contig_922368	128	100	69	0	0	38	69	36	5	4e-08
sil_1390791	contig_70881	122	98.55	69	1	0	33	67	35	1	4e-08
sil_1393324	contig_38182	117	97.1	69	2	0	38	69	194	225	4e-08
sil_1395299	contig_85717	122	98.55	69	1	0	35	69	55	21	4e-08
sil_1395477	contig_2203040	122	98.55	69	1	0	38	69	201	232	4e-08
sil_1398318	contig_907308	128	100	69	0	0	38	69	45	14	4e-08
sil_1401166	contig_2204587	122	98.55	69	1	0	38	69	36	5	4e-08
sil_1407543	contig_987453	128	100	69	0	0	30	69	340	379	6e-11
sil_1407548	contig_103576	122	98.55	69	1	0	38	69	198	229	4e-08
sil_1407595	contig_990345	128	100	69	0	0	38	69	194	225	4e-08
sil_1407628	contig_933513	117	97.1	69	2	0	38	69	171	202	4e-08
sil_1407661	contig_908458	128	100	69	0	0	35	69	182	217	4e-08
sil_1407680	contig_1454958	122	98.55	69	1	0	38	69	57	26	4e-08
sil_1407737	contig_92374	128	100	69	0	0	38	69	40	9	4e-08
sil_1407764	contig_90974	128	100	69	0	0	38	69	211	242	4e-08
sil_1407888	contig_2210116	128	100	69	0	0	30	69	734	773	6e-11
sil_1408520	contig_1043091	128	100	69	0	0	38	69	43	12	4e-08
sil_1409337	contig_933513	128	100	69	0	0	30	69	518	557	6e-11
sil_1664161	contig_74122	122	98.55	69	1	0	38	69	33	2	4e-08
sil_1667819	contig_926608	122	98.55	69	1	0	41	69	29	1	2e-06
sil_1668255	contig_963073	122	98.55	69	1	0	38	69	185	216	4e-08
sil_1670478	contig_2198249	128	100	69	0	0	27	69	50	8	6e-11
sil_1672741	contig_2203498	128	100	69	0	0	38	69	34	3	4e-08
sil_1673778	contig_14593	117	97.1	69	2	0	1	66	136	201	2e-25
sil_1683634	contig_911361	122	98.55	69	1	0	1	67	5277	5211	1e-22
sil_1694796	contig_11377	122	98.55	69	1	0	1	69	7193	7261	1e-28
sil_1694858	contig_12517	122	98.55	69	1	0	25	68	286	329	4e-13
sil_1695414	contig_934314	117	97.1	69	2	0	26	69	45	2	4e-13
sil_1696462	contig_909809	122	98.55	69	1	0	27	69	175	217	1e-12
sil_1697218	contig_913864	128	100	69	0	0	30	69	53	14	6e-11
sil_1697246	contig_2201422	122	98.55	69	1	0	42	69	168	195	6e-06
sil_1697250	contig_87867	122	98.55	69	1	0	24	69	48	3	1e-12
sil_1698253	contig_943293	122	98.55	69	1	0	22	69	213	262	1e-12
sil_1700547	contig_75015	128	100	69	0	0	30	69	42	3	6e-11
sil_1712901	contig_928522	128	100	69	0	0	27	69	376	418	1e-12
sil_1717455	contig_2257149	122	98.55	69	1	0	42	69	187	214	6e-06
sil_1719950	contig_2213235	128	100	69	0	0	27	69	187	229	1e-12
sil_1720841	contig_948244	128	100	69	0	0	31	68	39	2	8e-10
sil_1721291	contig_1025698	128	100	69	0	0	23	69	162	207	1e-12
sil_1721373	contig_2291795	128	100	69	0	0	30	69	321	360	6e-11
sil_1721543	contig_80986	128	100	69	0	0	27	69	193	235	1e-12
sil_1722172	contig_2250580	122	98.55	69	1	0	24	69	61	15	1e-12
sil_1722332	contig_2215661	128	100	69	0	0	27	69	850	892	1e-12
sil_1722439	contig_935922	128	100	69	0	0	27	69	64	22	6e-11
sil_1722601	contig_2203637	128	100	69	0	0	27	69	52	10	6e-11
sil_1723197	contig_2209306	128	100	69	0	0	28	69	50	9	5e-12
sil_1723199	contig_11148	122	98.55	69	1	0	28	69	44	3	5e-12
sil_1723353	contig_2218286	121	98.55	69	0	1	41	69	209	237	2e-06
sil_1724526	contig_23715	128	100	69	0	0	22	69	186	233	5e-12
sil_1725888	contig_2205919	128	100	69	0	0	27	69	48	6	6e-11
sil_1731408	contig_973361	117	97.1	69	2	0	28	69	47	6	5e-12
sil_1736987	contig_950770	128	100	69	0	0	28	69	50	9	5e-12
sil_1737778	contig_981271	128	100	69	0	0	28	69	62	21	5e-12
sil_1740266	contig_937122	122	98.55	69	1	0	28	69	46	5	5e-12
sil_1745349	contig_114252	117	97.1	69	2	0	28	69	55	14	5e-12
sil_1751768	contig_105493	117	97.1	69	2	0	35	69	743	777	4e-08
sil_1763304	contig_13475	117	97.1	69	2	0	38	69	56	25	4e-08
sil_1764004	contig_940665	122	98.55	69	1	0	28	69	42	1	5e-12
sil_1764545	contig_941951	128	100	69	0	0	30	69	225	264	6e-11
sil_1764551	contig_904517	128	100	69	0	0	28	69	43	2	5e-12
sil_1764915	contig_904560	128	100	69	0	0	28	69	47	6	5e-12
sil_1765274	contig_1552358	117	97.1	69	2	0	28	69	42	1	5e-12
sil_1770093	contig_127484	128	100	69	0	0	28	69	53	12	5e-12
sil_1770269	contig_13008	122	98.55	69	1	0	24	69	207	251	5e-12
sil_1770385	contig_905428	115	97.1	69	1	1	28	69	46	5	5e-12
sil_1770421	contig_1008363	122	98.55	69	1	0	28	69	62	21	5e-12
sil_1770947	contig_905747	128	100	69	0	0	28	69	57	16	5e-12
sil_1859885	contig_8015	128	100	69	0	0	28	69	49	8	5e-12
sil_1859984	contig_1258058	128	100	69	0	0	28	69	228	269	5e-12
sil_1860169	contig_940102	122	98.55	69	1	0	28	69	49	8	5e-12
sil_1860173	contig_117874	128	100	69	0	0	28	69	44	3	5e-12
sil_1860260	contig_74248	122	98.55	69	1	0	42	69	53	26	6e-06
sil_1860308	contig_905229	128	100	69	0	0	28	69	46	5	5e-12
sil_1860309	contig_905229	128	100	69	0	0	28	69	465	506	5e-12
sil_1860335	contig_938572	128	100	69	0	0	25	69	397	441	5e-12
sil_1860463	contig_2301291	128	100	69	0	0	30	69	316	355	6e-11
sil_1860500	contig_129455	128	100	69	0	0	24	68	257	301	5e-12
sil_1860547	contig_1055892	128	100	69	0	0	25	69	241	285	5e-12
sil_1860560	contig_2230715	128	100	69	0	0	28	69	210	251	5e-12
sil_1860625	contig_920873	117	97.1	69	2	0	38	69	37	6	4e-08
sil_1860691	contig_105239	128	100	69	0	0	28	69	249	290	5e-12
sil_1860768	contig_2282808	122	98.55	69	1	0	28	69	878	919	5e-12
sil_1861091	contig_71812	122	98.55	69	1	0	28	69	64	23	5e-12
sil_1861261	contig_39696	128	100	69	0	0	28	69	56	15	5e-12
sil_1861291	contig_2210451	128	100	69	0	0	28	69	45	4	5e-12
sil_1861346	contig_918931	122	98.55	69	1	0	25	69	49	5	5e-12
sil_1861457	contig_2203994	128	100	69	0	0	28	67	565	604	6e-11
sil_1861526	contig_2297014	117	97.1	69	2	0	38	69	851	882	4e-08
sil_1861552	contig_918569	128	100	69	0	0	28	69	56	15	5e-12
sil_1861570	contig_2223393	128	100	69	0	0	28	69	60	19	5e-12
sil_1861705	contig_915459	128	100	69	0	0	28	69	191	232	5e-12
sil_1861713	contig_14418	128	100	69	0	0	28	69	57	16	5e-12
sil_1861767	contig_987549	122	98.55	69	1	0	28	69	50	9	5e-12
sil_1861786	contig_12572	128	100	69	0	0	28	69	62	21	5e-12
sil_1861835	contig_105302	128	100	69	0	0	26	69	246	288	6e-11
sil_1861838	contig_9814	128	100	69	0	0	25	69	53	9	5e-12
sil_1861844	contig_933632	128	100	69	0	0	28	69	49	8	5e-12
sil_1862161	contig_935257	122	98.55	69	1	0	28	69	225	266	5e-12
sil_1862798	contig_918838	122	98.55	69	1	0	28	69	45	4	5e-12
sil_1862824	contig_939551	128	100	69	0	0	30	69	40	1	6e-11
sil_1864986	contig_914051	122	98.55	69	1	0	28	69	43	2	5e-12
sil_1865074	contig_922125	122	98.55	69	1	0	42	69	30	3	6e-06
sil_2245345	contig_2219970	122	98.55	69	1	0	28	69	179	220	5e-12
sil_2245356	contig_74822	117	97.1	69	2	0	21	69	1181	1231	4e-08
sil_2247010	contig_911129	122	98.55	69	1	0	42	69	49	22	6e-06
sil_2248098	contig_1026308	128	100	69	0	0	30	69	872	911	6e-11
sil_2248194	contig_2224751	122	98.55	69	1	0	42	69	39	12	6e-06
sil_2249815	contig_80381	122	98.55	69	1	0	42	69	31	4	6e-06
sil_2250213	contig_96279	122	98.55	69	1	0	42	69	181	208	6e-06
sil_2250298	contig_103154	122	98.55	69	1	0	42	69	33	6	6e-06
sil_2250418	contig_74888	122	98.55	69	1	0	42	69	44	17	6e-06
sil_2251099	contig_10457	117	97.1	69	2	0	29	69	64	24	4e-08
sil_2251565	contig_918156	122	98.55	69	1	0	28	69	182	223	5e-12
sil_2252191	contig_928857	128	100	69	0	0	27	69	47	5	6e-11
sil_2253437	contig_9701	122	98.55	69	1	0	42	69	32	5	6e-06
sil_2254698	contig_2248068	122	98.55	69	1	0	28	69	530	571	5e-12
sil_2255021	contig_9744	128	100	69	0	0	30	69	430	469	6e-11
sil_2256900	contig_71256	117	97.1	69	2	0	28	69	231	272	5e-12
sil_2256997	contig_1271696	122	98.55	69	1	0	42	69	42	15	6e-06
sil_2257019	contig_938575	117	97.1	69	2	0	38	69	486	517	4e-08
sil_2257084	contig_939561	117	97.1	69	2	0	28	69	179	220	5e-12
sil_2257141	contig_921507	117	97.1	69	2	0	28	69	269	310	5e-12
sil_2257380	contig_922954	128	100	69	0	0	30	69	55	16	6e-11
sil_2257508	contig_96279	122	98.55	69	1	0	42	69	40	13	6e-06
sil_2257559	contig_1008529	128	100	69	0	0	27	69	46	4	6e-11
sil_2258035	contig_905625	122	98.55	69	1	0	42	69	49	22	6e-06
sil_2260040	contig_976070	117	97.1	69	2	0	38	69	33	2	4e-08
sil_2261246	contig_2202064	128	100	69	0	0	30	69	268	307	6e-11
sil_2262791	contig_71411	117	97.1	69	2	0	31	69	3901	3938	4e-08
sil_2263451	contig_937809	122	98.55	69	1	0	42	69	54	27	6e-06
sil_2263542	contig_2223510	128	100	69	0	0	30	69	542	581	6e-11
sil_2265074	contig_2199275	117	97.1	69	2	0	38	69	35	4	4e-08
sil_2265444	contig_2203637	122	98.55	69	1	0	28	68	41	1	2e-11
sil_2265552	contig_943804	128	100	69	0	0	30	69	45	6	6e-11
sil_2269476	contig_927607	117	97.1	69	2	0	38	69	74	43	4e-08
sil_2275141	contig_945661	128	100	69	0	0	19	68	332	379	6e-11
sil_2275254	contig_928387	117	97.1	69	2	0	38	69	179	210	4e-08
sil_2275401	contig_2201918	117	97.1	69	2	0	38	69	170	201	4e-08
sil_2275491	contig_85041	122	98.55	69	1	0	29	69	187	227	2e-11
sil_2275593	contig_70200	117	97.1	69	2	0	38	69	223	254	4e-08
sil_2275686	contig_926508	117	97.1	69	2	0	29	69	53	13	2e-11
sil_2275703	contig_1032499	128	100	69	0	0	29	69	49	9	2e-11
sil_2275800	contig_29559	122	98.55	69	1	0	42	69	37	10	6e-06
sil_2275872	contig_957687	128	100	69	0	0	30	69	648	687	6e-11
sil_2275883	contig_1239642	117	97.1	69	2	0	29	69	181	221	2e-11
sil_2275938	contig_17624	128	100	69	0	0	27	69	43	1	6e-11
sil_2276016	contig_988024	122	98.55	69	1	0	42	69	29	2	6e-06
sil_2276058	contig_904872	117	97.1	69	2	0	29	69	49	9	2e-11
sil_2276112	contig_2199429	122	98.55	69	1	0	29	69	58	18	2e-11
sil_2276157	contig_946235	122	98.55	69	1	0	28	68	42	2	2e-11
sil_2276183	contig_950054	122	98.55	69	1	0	42	69	32	5	6e-06
sil_2276210	contig_951754	122	98.55	69	1	0	42	69	37	10	6e-06
sil_2276212	contig_917410	117	97.1	69	2	0	29	69	55	15	2e-11
sil_2276240	contig_2235683	128	100	69	0	0	30	69	56	17	6e-11
sil_2276366	contig_83806	122	98.55	69	1	0	29	69	56	16	2e-11
sil_2276577	contig_921145	128	100	69	0	0	29	69	44	4	2e-11
sil_2276870	contig_931557	117	97.1	69	2	0	29	69	46	6	2e-11
sil_2276933	contig_912299	122	98.55	69	1	0	39	69	40	9	6e-06
sil_2276934	contig_945661	128	100	69	0	0	27	69	49	7	6e-11
sil_2276959	contig_103906	128	100	69	0	0	29	69	52	12	2e-11
sil_2277005	contig_2197238	128	100	69	0	0	28	68	41	1	2e-11
sil_2277083	contig_2203594	128	100	69	0	0	27	69	583	626	6e-11
sil_2277099	contig_940618	117	97.1	69	2	0	29	69	46	6	2e-11
sil_2277150	contig_906930	128	100	69	0	0	29	69	60	20	2e-11
sil_2277328	contig_147431	128	100	69	0	0	30	69	44	5	6e-11
sil_2277331	contig_14871	122	98.55	69	1	0	42	69	242	269	6e-06
sil_2278121	contig_952921	128	100	69	0	0	29	69	44	4	2e-11
sil_2278841	contig_2201329	122	98.55	69	1	0	29	69	591	631	2e-11
sil_2278946	contig_972586	122	98.55	69	1	0	29	69	51	11	2e-11
sil_2279217	contig_10800	128	100	69	0	0	30	69	648	687	6e-11
sil_2279316	contig_937360	117	97.1	69	2	0	31	69	40	3	4e-08
sil_2280020	contig_1341733	122	98.55	69	1	0	42	69	55	28	6e-06
sil_2281175	contig_938377	128	100	69	0	0	30	69	53	14	6e-11
sil_2282700	contig_1041006	128	100	69	0	0	29	69	59	19	2e-11
sil_2284605	contig_83719	128	100	69	0	0	26	69	63	21	6e-11
sil_2288387	contig_70987	122	98.55	69	1	0	42	69	56	29	6e-06
sil_2288416	contig_1019789	128	100	69	0	0	30	69	444	483	6e-11
sil_2288962	contig_23529	128	100	69	0	0	29	69	44	4	2e-11
sil_2288976	contig_961951	122	98.55	69	1	0	29	69	51	11	2e-11
sil_2289012	contig_1620504	117	97.1	69	2	0	29	69	141	181	2e-11
sil_2289029	contig_986669	128	100	69	0	0	29	69	47	7	2e-11
sil_2289165	contig_1009667	122	98.55	69	1	0	29	69	51	11	2e-11
sil_2289207	contig_74783	128	100	69	0	0	30	69	60	21	6e-11
sil_2289296	contig_916393	128	100	69	0	0	29	69	153	193	2e-11
sil_2289328	contig_2214207	128	100	69	0	0	29	69	58	18	2e-11
sil_2290108	contig_2210153	115	97.1	69	1	1	41	69	46	18	2e-06
sil_2290122	contig_1264098	128	100	69	0	0	26	69	47	4	2e-11
sil_2290133	contig_2196915	128	100	69	0	0	30	69	45	6	6e-11
sil_2290136	contig_1035199	128	100	69	0	0	29	69	47	7	2e-11
sil_2290628	contig_959667	117	97.1	69	2	0	28	68	53	13	2e-11
sil_2292936	contig_1582685	122	98.55	69	1	0	29	69	158	198	2e-11
sil_2294578	contig_2225191	122	98.55	69	1	0	29	69	209	249	2e-11
sil_2297724	contig_106530	128	100	69	0	0	30	69	66	27	6e-11
sil_2300339	contig_1029229	128	100	69	0	0	29	69	222	262	2e-11
sil_2303384	contig_983153	121	98.55	69	0	1	41	69	46	18	2e-06
sil_2305100	contig_75015	128	100	69	0	0	30	69	652	691	6e-11
sil_2305243	contig_937678	122	98.55	69	1	0	11	69	71	13	2e-11
sil_2305764	contig_74031	122	98.55	69	1	0	29	69	63	23	2e-11
sil_2311583	contig_31575	128	100	69	0	0	30	69	53	14	6e-11
sil_2320423	contig_2202265	117	97.1	69	2	0	38	69	263	294	4e-08
sil_2322429	contig_2219117	122	98.55	69	1	0	42	69	32	5	6e-06
sil_2322447	contig_937608	128	100	69	0	0	27	69	2784	2826	6e-11
sil_2322947	contig_2219249	128	100	69	0	0	29	69	51	11	2e-11
sil_2326504	contig_956251	128	100	69	0	0	29	69	45	5	2e-11
sil_2327075	contig_9467	122	98.55	69	1	0	42	69	36	9	6e-06
sil_2328044	contig_79762	128	100	69	0	0	29	69	44	4	2e-11
sil_2328344	contig_912172	122	98.55	69	1	0	29	69	206	246	2e-11
sil_2329851	contig_75327	122	98.55	69	1	0	29	69	48	8	2e-11
sil_2332274	contig_2216488	122	98.55	69	1	0	29	69	75	35	2e-11
sil_2357011	contig_936517	122	98.55	69	1	0	29	69	57	17	2e-11
sil_2370219	contig_992905	128	100	69	0	0	29	69	279	319	2e-11
sil_3020992	contig_923070	128	100	69	0	0	29	69	45	5	2e-11
sil_3022336	contig_1603185	128	100	69	0	0	25	69	251	294	2e-11
sil_3023075	contig_2202485	128	100	69	0	0	29	69	48	8	2e-11
sil_3023934	contig_905428	128	100	69	0	0	29	69	275	315	2e-11
sil_3026051	contig_1002159	122	98.55	69	1	0	42	69	377	404	6e-06
sil_3030304	contig_929361	128	100	69	0	0	27	69	56	14	6e-11
sil_3034093	contig_994133	128	100	69	0	0	29	69	45	5	2e-11
sil_3064755	contig_2223106	117	97.1	69	2	0	35	69	194	228	4e-08
sil_3384639	contig_80821	128	100	69	0	0	29	69	323	363	2e-11
sil_3384655	contig_932769	122	98.55	69	1	0	42	69	47	20	6e-06
sil_3570193	contig_1070058	128	100	69	0	0	27	69	49	7	6e-11
sil_3570217	contig_947772	117	97.1	69	2	0	29	69	44	4	2e-11
sil_3570219	contig_929348	128	100	69	0	0	29	69	46	6	2e-11
sil_3570221	contig_844966	122	98.55	69	1	0	29	69	42	2	2e-11
sil_3570240	contig_981471	128	100	69	0	0	29	69	41	1	2e-11
sil_3570246	contig_920376	128	100	69	0	0	29	69	500	540	2e-11
sil_3570256	contig_938740	128	100	69	0	0	29	69	213	253	2e-11
sil_3570264	contig_84051	128	100	69	0	0	29	69	52	12	2e-11
sil_3570268	contig_2231755	128	100	69	0	0	26	69	329	372	2e-11
sil_3570280	contig_2241855	128	100	69	0	0	29	69	422	462	2e-11
sil_3570294	contig_1061985	128	100	69	0	0	29	69	46	6	2e-11
sil_3570296	contig_956747	128	100	69	0	0	29	69	294	334	2e-11
sil_3570322	contig_1200237	128	100	69	0	0	29	69	57	17	2e-11
sil_3570344	contig_122927	128	100	69	0	0	28	68	41	1	2e-11
sil_3570366	contig_966984	128	100	69	0	0	29	69	49	9	2e-11
sil_3570372	contig_2218768	128	100	69	0	0	28	69	53	13	2e-11
sil_3570374	contig_912213	122	98.55	69	1	0	29	69	247	287	2e-11
sil_3570407	contig_2232348	128	100	69	0	0	29	69	44	4	2e-11
sil_3570417	contig_911250	128	100	69	0	0	29	69	342	382	2e-11
sil_3570419	contig_80490	128	100	69	0	0	29	69	447	487	2e-11
sil_3570433	contig_1038786	128	100	69	0	0	29	69	224	264	2e-11
sil_3570442	contig_1109164	122	98.55	69	1	0	29	69	302	342	2e-11
sil_3570463	contig_905288	128	100	69	0	0	26	69	519	562	2e-11
sil_3570471	contig_1010422	128	100	69	0	0	29	69	43	3	2e-11
sil_3570505	contig_1077304	128	100	69	0	0	29	69	54	14	2e-11
sil_3570531	contig_993311	128	100	69	0	0	29	69	734	774	2e-11
sil_3570538	contig_975107	128	100	69	0	0	29	69	53	13	2e-11
sil_3570543	contig_907759	128	100	69	0	0	29	69	321	361	2e-11
sil_3570562	contig_9950	128	100	69	0	0	26	69	306	350	2e-11
sil_3570573	contig_967330	128	100	69	0	0	29	69	225	265	2e-11
sil_3570577	contig_2227697	128	100	69	0	0	29	69	316	356	2e-11
sil_3570590	contig_920158	128	100	69	0	0	29	69	872	912	2e-11
sil_3570597	contig_1455583	128	100	69	0	0	29	69	430	470	2e-11
sil_3570614	contig_969494	128	100	69	0	0	29	69	55	15	2e-11
sil_3570615	contig_2199735	128	100	69	0	0	29	69	51	11	2e-11
sil_3570658	contig_2198899	128	100	69	0	0	29	69	542	582	2e-11
sil_3570663	contig_992681	122	98.55	69	1	0	29	69	45	5	2e-11
sil_3570665	contig_1013053	128	100	69	0	0	29	69	648	688	2e-11
sil_3570693	contig_83201	128	100	69	0	0	30	69	59	20	6e-11
sil_3570716	contig_930664	128	100	69	0	0	29	69	56	16	2e-11
sil_3570730	contig_9078	117	97.1	69	2	0	23	69	342	388	2e-11
sil_3570732	contig_940102	128	100	69	0	0	29	69	44	4	2e-11
sil_3570739	contig_1247620	122	98.55	69	1	0	29	69	648	688	2e-11
sil_3570745	contig_2274340	122	98.55	69	1	0	29	69	53	13	2e-11
sil_3570789	contig_1449802	128	100	69	0	0	29	69	60	20	2e-11
sil_3570843	contig_2204298	128	100	69	0	0	29	69	60	20	2e-11
sil_3570931	contig_2208542	117	97.1	69	2	0	29	69	45	5	2e-11
sil_3570970	contig_991631	128	100	69	0	0	29	69	66	26	2e-11
sil_3570974	contig_930664	121	98.55	69	0	1	24	69	525	569	1e-08
sil_3570977	contig_970523	128	100	69	0	0	25	69	48	5	2e-11
sil_3571008	contig_2230762	128	100	69	0	0	30	69	169	208	6e-11
sil_3571017	contig_75323	128	100	69	0	0	26	69	194	237	2e-11
sil_3571028	contig_991631	115	97.1	69	1	1	41	69	251	279	2e-06
sil_3571046	contig_908082	128	100	69	0	0	15	69	144	195	2e-11
sil_3571052	contig_2198789	128	100	69	0	0	29	69	42	2	2e-11
sil_3571060	contig_940582	128	100	69	0	0	29	69	55	15	2e-11
sil_3571063	contig_19781	128	100	69	0	0	29	69	46	6	2e-11
sil_3571105	contig_2199848	128	100	69	0	0	29	69	165	205	2e-11
sil_3571111	contig_939909	128	100	69	0	0	26	69	45	2	2e-11
sil_3571115	contig_938485	122	98.55	69	1	0	26	69	51	8	2e-11
sil_3571128	contig_12235	128	100	69	0	0	29	69	202	242	2e-11
sil_3571134	contig_122740	128	100	69	0	0	29	69	63	23	2e-11
sil_3571136	contig_2204587	128	100	69	0	0	29	69	46	6	2e-11
sil_3571145	contig_918464	128	100	69	0	0	26	69	181	225	2e-11
sil_3571156	contig_928857	121	98.55	69	0	1	38	69	45	14	2e-06
sil_3571160	contig_1576568	128	100	69	0	0	24	69	162	207	6e-11
sil_3571168	contig_2313739	128	100	69	0	0	29	69	49	9	2e-11
sil_3571188	contig_908531	117	97.1	69	2	0	29	69	45	5	2e-11
sil_3571203	contig_905607	128	100	69	0	0	29	69	41	1	2e-11
sil_3571214	contig_2302737	128	100	69	0	0	20	69	92	139	6e-11
sil_3571219	contig_93865	122	98.55	69	1	0	29	69	57	17	2e-11
sil_3571233	contig_922483	122	98.55	69	1	0	29	69	54	14	2e-11
sil_3571248	contig_983380	128	100	69	0	0	29	69	42	2	2e-11
sil_3571256	contig_1004287	128	100	69	0	0	29	69	184	224	2e-11
sil_3571274	contig_966786	121	98.55	69	0	1	41	69	262	290	2e-06
sil_3571277	contig_937371	115	97.1	69	1	1	31	69	51	15	2e-06
sil_3571328	contig_70543	128	100	69	0	0	29	69	198	238	2e-11
sil_3571345	contig_917889	122	98.55	69	1	0	29	69	194	234	2e-11
sil_3571349	contig_1009106	128	100	69	0	0	12	69	77	20	6e-11
sil_3571355	contig_969580	122	98.55	69	1	0	29	69	57	17	2e-11
sil_3571360	contig_12334	128	100	69	0	0	29	69	43	3	2e-11
sil_3571370	contig_923938	128	100	69	0	0	29	69	150	190	2e-11
sil_3571457	contig_966331	117	97.1	69	2	0	38	69	259	290	4e-08
sil_3571459	contig_940206	122	98.55	69	1	0	29	69	203	243	2e-11
sil_3571460	contig_8060	128	100	69	0	0	29	69	51	11	2e-11
sil_3571474	contig_924692	128	100	69	0	0	29	69	45	5	2e-11
sil_3571477	contig_947772	128	100	69	0	0	29	69	41	1	2e-11
sil_3571500	contig_945877	128	100	69	0	0	22	69	167	213	2e-11
sil_3571513	contig_925760	128	100	69	0	0	29	69	188	228	2e-11
sil_3571515	contig_906483	117	97.1	69	2	0	28	68	196	236	2e-11
sil_3571526	contig_130489	128	100	69	0	0	29	69	181	221	2e-11
sil_3571527	contig_14694	122	98.55	69	1	0	29	69	180	220	2e-11
sil_3571536	contig_947572	122	98.55	69	1	0	29	69	48	8	2e-11
sil_3571553	contig_906126	128	100	69	0	0	29	69	186	226	2e-11
sil_3571554	contig_992585	128	100	69	0	0	20	69	65	16	2e-11
sil_3571588	contig_143146	128	100	69	0	0	29	69	49	9	2e-11
sil_3571591	contig_77862	128	100	69	0	0	26	69	63	20	2e-11
sil_3571604	contig_1463729	122	98.55	69	1	0	42	69	37	10	6e-06
sil_3571674	contig_910045	128	100	69	0	0	29	69	47	7	2e-11
sil_3571677	contig_924687	122	98.55	69	1	0	41	68	28	1	6e-06
sil_3571689	contig_2199054	128	100	69	0	0	29	69	45	5	2e-11
sil_3571717	contig_12257	128	100	69	0	0	22	69	151	197	2e-11
sil_3571728	contig_1080661	128	100	69	0	0	29	69	58	18	2e-11
sil_3571752	contig_81653	128	100	69	0	0	29	69	61	21	2e-11
sil_3571760	contig_71560	122	98.55	69	1	0	42	69	366	393	6e-06
sil_3571764	contig_13580	128	100	69	0	0	29	69	65	25	2e-11
sil_3571783	contig_1362604	128	100	69	0	0	29	69	46	6	2e-11
sil_3571788	contig_2200343	122	98.55	69	1	0	42	69	44	17	6e-06
sil_3571796	contig_926429	128	100	69	0	0	29	69	224	264	2e-11
sil_3571822	contig_1495462	122	98.55	69	1	0	29	69	952	992	2e-11
sil_3571828	contig_936442	128	100	69	0	0	30	69	42	3	6e-11
sil_3571831	contig_970125	128	100	69	0	0	29	69	44	4	2e-11
sil_3571865	contig_2202614	128	100	69	0	0	30	69	55	16	6e-11
sil_3571868	contig_12744	121	98.55	69	0	1	26	69	209	252	4e-13
sil_3571893	contig_906795	128	100	69	0	0	29	69	45	5	2e-11
sil_3571920	contig_965266	128	100	69	0	0	29	69	57	17	2e-11
sil_3571924	contig_72682	128	100	69	0	0	29	69	202	242	2e-11
sil_3571929	contig_918122	128	100	69	0	0	29	69	45	5	2e-11
sil_3571934	contig_920556	128	100	69	0	0	29	69	49	9	2e-11
sil_3571939	contig_2261328	128	100	69	0	0	26	69	55	11	2e-11
sil_3571957	contig_1009239	128	100	69	0	0	29	69	192	232	2e-11
sil_3571960	contig_134295	128	100	69	0	0	30	69	46	7	6e-11
sil_3571982	contig_75197	128	100	69	0	0	29	69	45	5	2e-11
sil_3572018	contig_939273	128	100	69	0	0	29	69	47	7	2e-11
sil_3572034	contig_2212077	128	100	69	0	0	19	69	344	392	2e-11
sil_3572079	contig_104675	115	97.1	69	1	1	29	69	215	255	2e-11
sil_3572093	contig_9918	128	100	69	0	0	29	69	198	238	2e-11
sil_3572112	contig_105433	128	100	69	0	0	29	69	337	377	2e-11
sil_3572115	contig_962439	121	98.55	69	0	1	38	69	67	36	4e-08
sil_3572129	contig_128526	128	100	69	0	0	29	69	997	1037	2e-11
sil_3572154	contig_2198821	128	100	69	0	0	28	68	41	1	2e-11
sil_3572157	contig_76698	128	100	69	0	0	29	69	164	204	2e-11
sil_3572159	contig_943603	128	100	69	0	0	26	69	160	203	2e-11
sil_3572174	contig_912906	128	100	69	0	0	26	69	146	189	2e-11
sil_3572179	contig_1384482	122	98.55	69	1	0	29	69	185	225	2e-11
sil_3572193	contig_914302	117	97.1	69	2	0	29	69	57	17	2e-11
sil_3572200	contig_937191	128	100	69	0	0	29	69	48	8	2e-11
sil_3572225	contig_16854	128	100	69	0	0	29	69	288	328	2e-11
sil_3572274	contig_995065	128	100	69	0	0	24	69	51	6	6e-11
sil_3572278	contig_9950	128	100	69	0	0	27	69	53	10	6e-11
sil_3572285	contig_983098	128	100	69	0	0	30	69	54	15	6e-11
sil_3572291	contig_81689	128	100	69	0	0	30	69	48	9	6e-11
sil_3572309	contig_953590	128	100	69	0	0	30	69	45	6	6e-11
sil_3572311	contig_13470	128	100	69	0	0	30	69	57	18	6e-11
sil_3572330	contig_965221	128	100	69	0	0	30	69	41	2	6e-11
sil_3572346	contig_1113880	128	100	69	0	0	30	69	53	14	6e-11
sil_3572353	contig_2209500	128	100	69	0	0	30	69	50	11	6e-11
sil_3572378	contig_1001606	128	100	69	0	0	24	69	49	3	6e-11
sil_3572407	contig_917345	121	98.55	69	0	1	26	69	58	15	4e-13
sil_3572408	contig_912453	128	100	69	0	0	30	69	216	255	6e-11
sil_3572409	contig_82141	128	100	69	0	0	24	69	55	10	6e-11
sil_3572414	contig_2203681	122	98.55	69	1	0	30	69	46	7	6e-11
sil_3572418	contig_75078	128	100	69	0	0	30	69	192	231	6e-11
sil_3572419	contig_1122418	128	100	69	0	0	30	69	45	6	6e-11
sil_3572435	contig_1005787	128	100	69	0	0	30	69	247	286	6e-11
sil_3572442	contig_909328	128	100	69	0	0	30	69	43	4	6e-11
sil_3572444	contig_968209	128	100	69	0	0	27	69	43	1	6e-11
sil_3572450	contig_82141	128	100	69	0	0	30	69	153	192	6e-11
sil_3572451	contig_11952	128	100	69	0	0	30	69	50	11	6e-11
sil_3572497	contig_2204672	128	100	69	0	0	30	69	229	268	6e-11
sil_3572498	contig_2203413	128	100	69	0	0	30	69	220	259	6e-11
sil_3572554	contig_916701	128	100	69	0	0	30	69	46	7	6e-11
sil_3572564	contig_74004	128	100	69	0	0	26	69	43	1	6e-11
sil_3572565	contig_2213233	128	100	69	0	0	30	69	165	204	6e-11
sil_3572567	contig_982393	128	100	69	0	0	30	69	50	11	6e-11
sil_3572592	contig_919697	122	98.55	69	1	0	42	69	46	19	6e-06
sil_3572594	contig_20022	122	98.55	69	1	0	30	69	56	17	6e-11
sil_3572612	contig_2252821	117	97.1	69	2	0	30	69	43	4	6e-11
sil_3572618	contig_33998	122	98.55	69	1	0	30	69	48	9	6e-11
sil_3572628	contig_2323025	117	97.1	69	2	0	30	69	45	6	6e-11
sil_3572634	contig_954976	128	100	69	0	0	30	69	236	275	6e-11
sil_3572647	contig_2211929	122	98.55	69	1	0	30	69	43	4	6e-11
sil_3572705	contig_16312	122	98.55	69	1	0	42	69	52	25	6e-06
sil_3572710	contig_72727	128	100	69	0	0	30	69	44	5	6e-11
sil_3572722	contig_949588	122	98.55	69	1	0	30	69	320	359	6e-11
sil_3572742	contig_922078	128	100	69	0	0	30	69	47	8	6e-11
sil_3572745	contig_83893	128	100	69	0	0	30	69	54	15	6e-11
sil_3572780	contig_955725	128	100	69	0	0	29	68	42	3	6e-11
sil_3572793	contig_2228878	128	100	69	0	0	30	69	41	2	6e-11
sil_3572795	contig_917328	128	100	69	0	0	30	69	41	2	6e-11
sil_3572809	contig_906835	128	100	69	0	0	30	69	42	3	6e-11
sil_3572827	contig_2202040	128	100	69	0	0	30	69	56	17	6e-11
sil_3572848	contig_2087726	128	100	69	0	0	24	69	1037	1083	6e-11
sil_3572885	contig_923989	128	100	69	0	0	30	69	50	11	6e-11
sil_3572896	contig_913381	128	100	69	0	0	30	69	43	4	6e-11
sil_3572917	contig_11036	122	98.55	69	1	0	30	69	46	7	6e-11
sil_3572956	contig_1076269	128	100	69	0	0	30	69	44	5	6e-11
sil_3572989	contig_2210191	122	98.55	69	1	0	30	69	43	4	6e-11
sil_3573005	contig_1476626	128	100	69	0	0	30	69	42	3	6e-11
sil_3573016	contig_2209600	117	97.1	69	2	0	38	69	211	242	4e-08
sil_3573023	contig_975107	128	100	69	0	0	30	69	42	3	6e-11
sil_3573032	contig_2215771	128	100	69	0	0	30	69	41	2	6e-11
sil_3573040	contig_917236	117	97.1	69	2	0	30	69	170	209	6e-11
sil_3573072	contig_915907	128	100	69	0	0	30	69	42	3	6e-11
sil_3573073	contig_942316	128	100	69	0	0	30	69	43	4	6e-11
sil_3573078	contig_72614	128	100	69	0	0	30	69	47	8	6e-11
sil_3573116	contig_442058	128	100	69	0	0	30	69	41	2	6e-11
sil_3573128	contig_910052	128	100	69	0	0	30	69	40	1	6e-11
sil_3573129	contig_74562	128	100	69	0	0	30	69	52	13	6e-11
sil_3573146	contig_946492	128	100	69	0	0	30	69	184	223	6e-11
sil_3573166	contig_72063	128	100	69	0	0	21	69	54	6	6e-11
sil_3573176	contig_2355323	128	100	69	0	0	30	69	400	439	6e-11
sil_3573185	contig_1832704	122	98.55	69	1	0	30	69	41	2	6e-11
sil_3573195	contig_917535	128	100	69	0	0	30	69	186	225	6e-11
sil_3573202	contig_70209	117	97.1	69	2	0	27	69	229	271	6e-11
sil_3573205	contig_2219614	128	100	69	0	0	30	69	48	9	6e-11
sil_3573220	contig_2243808	128	100	69	0	0	30	69	55	16	6e-11
sil_3573222	contig_926014	128	100	69	0	0	30	69	48	9	6e-11
sil_3573227	contig_943112	128	100	69	0	0	30	69	46	7	6e-11
sil_3573266	contig_112311	122	98.55	69	1	0	30	69	148	187	6e-11
sil_3573268	contig_912100	115	97.1	69	1	1	30	69	49	10	6e-11
sil_3573276	contig_1189285	128	100	69	0	0	30	69	46	7	6e-11
sil_3573326	contig_1905990	122	98.55	69	1	0	30	69	41	2	6e-11
sil_3573329	contig_922400	128	100	69	0	0	27	69	240	282	6e-11
sil_3573332	contig_1257113	128	100	69	0	0	30	69	359	398	6e-11
sil_3573356	contig_2346837	128	100	69	0	0	27	69	230	272	6e-11
sil_3573367	contig_1001870	122	98.55	69	1	0	30	69	275	314	6e-11
sil_3573368	contig_945546	128	100	69	0	0	30	69	278	317	6e-11
sil_3573378	contig_1811690	128	100	69	0	0	30	69	47	8	6e-11
sil_3573383	contig_924785	128	100	69	0	0	30	69	57	18	6e-11
sil_3573388	contig_913332	128	100	69	0	0	27	69	46	4	6e-11
sil_3573398	contig_2199528	128	100	69	0	0	30	69	202	241	6e-11
sil_3573429	contig_913915	128	100	69	0	0	30	69	40	1	6e-11
sil_3573437	contig_937171	115	97.1	69	1	1	30	69	305	344	6e-11
sil_3573447	contig_1009662	128	100	69	0	0	30	69	43	4	6e-11
sil_3573463	contig_17601	128	100	69	0	0	30	69	293	332	6e-11
sil_3573468	contig_2209043	128	100	69	0	0	25	69	276	322	6e-11
sil_3573485	contig_127011	128	100	69	0	0	30	69	273	312	6e-11
sil_3573492	contig_1620369	128	100	69	0	0	30	69	42	3	6e-11
sil_3573503	contig_2203746	128	100	69	0	0	14	69	404	457	6e-11
sil_3573528	contig_2197707	122	98.55	69	1	0	30	69	53	14	6e-11
sil_3573534	contig_958993	128	100	69	0	0	30	69	49	10	6e-11
sil_3573590	contig_2197707	128	100	69	0	0	30	69	47	8	6e-11
sil_3573598	contig_918657	128	100	69	0	0	30	69	47	8	6e-11
sil_3573626	contig_162305	128	100	69	0	0	27	69	58	16	6e-11
sil_3573635	contig_1068281	122	98.55	69	1	0	29	68	40	1	6e-11
sil_3573651	contig_2203806	117	97.1	69	2	0	30	69	51	12	6e-11
sil_3573659	contig_111203	128	100	69	0	0	26	69	237	279	6e-11
sil_3573682	contig_1057305	128	100	69	0	0	30	69	67	28	6e-11
sil_3573689	contig_2198004	128	100	69	0	0	30	69	324	363	6e-11
sil_3573702	contig_130102	128	100	69	0	0	30	69	51	12	6e-11
sil_3573703	contig_2248497	128	100	69	0	0	30	69	73	34	6e-11
sil_3573738	contig_943142	128	100	69	0	0	30	69	42	3	6e-11
sil_3573746	contig_29288	117	97.1	69	2	0	29	68	40	1	6e-11
sil_3573747	contig_929762	128	100	69	0	0	30	69	63	24	6e-11
sil_3573759	contig_90426	128	100	69	0	0	30	69	47	8	6e-11
sil_3573775	contig_2206444	122	98.55	69	1	0	30	69	69	30	6e-11
sil_3573778	contig_937221	128	100	69	0	0	30	69	46	7	6e-11
sil_3573782	contig_2198789	128	100	69	0	0	30	69	40	1	6e-11
sil_3573800	contig_2196824	128	100	69	0	0	30	69	41	2	6e-11
sil_3573814	contig_2202828	128	100	69	0	0	30	69	291	330	6e-11
sil_3573825	contig_2205097	122	98.55	69	1	0	30	69	45	6	6e-11
sil_3573869	contig_78488	128	100	69	0	0	27	69	65	23	6e-11
sil_3573885	contig_920321	122	98.55	69	1	0	29	68	42	3	6e-11
sil_3573888	contig_946961	128	100	69	0	0	26	69	43	1	6e-11
sil_3573917	contig_1038858	117	97.1	69	2	0	30	69	386	425	6e-11
sil_3573922	contig_21394	128	100	69	0	0	30	69	255	294	6e-11
sil_3573939	contig_967155	128	100	69	0	0	30	69	52	13	6e-11
sil_3573941	contig_962165	128	100	69	0	0	30	69	297	336	6e-11
sil_3573942	contig_1833578	117	97.1	69	2	0	30	69	48	9	6e-11
sil_3573956	contig_18021	128	100	69	0	0	27	69	264	306	6e-11
sil_3573962	contig_910504	128	100	69	0	0	30	69	64	25	6e-11
sil_3573976	contig_988073	128	100	69	0	0	30	69	41	2	6e-11
sil_3573992	contig_248974	128	100	69	0	0	27	69	45	3	6e-11
sil_3574026	contig_12257	117	97.1	69	2	0	30	69	53	14	6e-11
sil_3574028	contig_908308	128	100	69	0	0	30	69	300	339	6e-11
sil_3574029	contig_966526	128	100	69	0	0	30	69	364	403	6e-11
sil_3574046	contig_2208227	117	97.1	69	2	0	31	69	47	10	4e-08
sil_3574068	contig_923056	128	100	69	0	0	30	69	198	237	6e-11
sil_3574105	contig_2219762	122	98.55	69	1	0	27	69	342	384	6e-11
sil_3574106	contig_918995	122	98.55	69	1	0	25	69	284	330	6e-11
sil_3574213	contig_909205	128	100	69	0	0	30	69	56	17	6e-11
sil_3574351	contig_946661	128	100	69	0	0	26	68	414	456	6e-11
sil_3574680	contig_2197133	122	98.55	69	1	0	30	69	451	490	6e-11
sil_3574694	contig_53277	122	98.55	69	1	0	42	69	29	2	6e-06
sil_3574700	contig_919934	128	100	69	0	0	30	69	43	4	6e-11
sil_3574709	contig_957327	122	98.55	69	1	0	30	69	259	298	6e-11
sil_3574712	contig_988558	128	100	69	0	0	30	69	43	4	6e-11
sil_3574854	contig_936764	122	98.55	69	1	0	30	69	42	3	6e-11
sil_3574986	contig_955457	128	100	69	0	0	30	69	45	6	6e-11
sil_3575167	contig_958333	122	98.55	69	1	0	27	69	628	671	6e-11
sil_3575168	contig_11501	128	100	69	0	0	12	69	265	323	6e-11
sil_3575174	contig_915937	122	98.55	69	1	0	30	69	55	16	6e-11
sil_3575179	contig_2208753	128	100	69	0	0	30	69	45	6	6e-11
sil_3575230	contig_969544	117	97.1	69	2	0	30	69	47	8	6e-11
sil_3575234	contig_129448	128	100	69	0	0	30	69	43	4	6e-11
sil_3575322	contig_946487	128	100	69	0	0	29	68	40	1	6e-11
sil_3575368	contig_1018483	128	100	69	0	0	27	69	451	493	6e-11
sil_3575380	contig_2217672	128	100	69	0	0	30	69	270	309	6e-11
sil_3575420	contig_85350	128	100	69	0	0	30	69	50	11	6e-11
sil_3575446	contig_2200275	117	97.1	69	2	0	22	69	204	249	4e-08
sil_3575450	contig_86076	128	100	69	0	0	30	69	303	342	6e-11
sil_3575454	contig_916501	128	100	69	0	0	23	69	67	22	6e-11
sil_3575460	contig_934826	128	100	69	0	0	30	69	57	18	6e-11
sil_3575461	contig_2205804	117	97.1	69	2	0	30	69	41	2	6e-11
sil_3575467	contig_934024	128	100	69	0	0	30	69	166	205	6e-11
sil_3575482	contig_989673	128	100	69	0	0	30	69	391	430	6e-11
sil_3575485	contig_2208490	128	100	69	0	0	27	69	44	2	6e-11
sil_3575496	contig_75683	128	100	69	0	0	30	69	49	10	6e-11
sil_3575508	contig_2210540	128	100	69	0	0	30	69	48	9	6e-11
sil_3575519	contig_906407	128	100	69	0	0	30	69	48	9	6e-11
sil_3575527	contig_2231195	128	100	69	0	0	30	69	282	321	6e-11
sil_3575528	contig_1545637	128	100	69	0	0	30	69	51	12	6e-11
sil_3575532	contig_8283	115	97.1	69	0	1	29	69	377	417	2e-11
sil_3575560	contig_2213729	128	100	69	0	0	30	69	43	4	6e-11
sil_3575571	contig_1461028	122	98.55	69	1	0	24	69	192	238	6e-11
sil_3575574	contig_912701	128	100	69	0	0	30	69	271	310	6e-11
sil_3575575	contig_983007	115	97.1	69	0	1	29	69	249	289	2e-11
sil_3575580	contig_72153	128	100	69	0	0	27	69	52	10	6e-11
sil_3575587	contig_1012727	128	100	69	0	0	27	69	54	11	6e-11
sil_3575607	contig_49510	128	100	69	0	0	30	69	44	5	6e-11
sil_3575617	contig_921465	128	100	69	0	0	30	69	58	19	6e-11
sil_3575642	contig_72423	122	98.55	69	1	0	7	69	1983	2045	1e-18
sil_3575643	contig_975885	128	100	69	0	0	37	69	50	18	1e-08
sil_3575693	contig_1017063	128	100	69	0	0	30	69	41	2	6e-11
sil_3575704	contig_1477070	128	100	69	0	0	33	69	42	7	1e-08
sil_3575736	contig_931149	128	100	69	0	0	38	69	52	21	4e-08
sil_3575744	contig_1034385	128	100	69	0	0	27	69	61	18	6e-11
sil_3575748	contig_1003677	128	100	69	0	0	38	69	34	3	4e-08
sil_3575762	contig_46081	128	100	69	0	0	38	69	42	11	4e-08
sil_3575767	contig_920041	117	97.1	69	2	0	38	69	64	33	4e-08
sil_3575800	contig_906565	128	100	69	0	0	38	69	45	14	4e-08
sil_3575811	contig_13815	128	100	69	0	0	38	69	36	5	4e-08
sil_3575812	contig_922178	128	100	69	0	0	38	69	44	13	4e-08
sil_3575815	contig_75142	128	100	69	0	0	38	69	42	11	4e-08
sil_3575828	contig_944513	122	98.55	69	1	0	33	67	35	1	4e-08
sil_3938418	contig_72446	117	97.1	69	2	0	38	69	201	232	4e-08
sil_3938791	contig_2212951	128	100	69	0	0	38	69	173	204	4e-08
sil_3939338	contig_927406	122	98.55	69	1	0	38	69	64	33	4e-08
sil_3940413	contig_71586	122	98.55	69	1	0	38	69	3403	3434	4e-08
sil_3941546	contig_96279	117	97.1	69	2	0	38	69	49	18	4e-08
sil_3943788	contig_70771	117	97.1	69	2	0	31	69	44	7	4e-08
sil_3946326	contig_914545	128	100	69	0	0	38	69	44	13	4e-08
sil_3951639	contig_910388	128	100	69	0	0	39	69	43	13	1e-07
sil_3953456	contig_2199347	117	97.1	69	2	0	39	69	274	304	1e-07
sil_3953519	contig_33789	122	98.55	69	1	0	39	69	50	20	1e-07
sil_3955814	contig_922225	122	98.55	69	1	0	39	69	68	38	1e-07
sil_3959176	contig_10394	117	97.1	69	2	0	33	69	60	24	1e-07
sil_3959928	contig_915176	122	98.55	69	1	0	39	69	206	236	1e-07
sil_3960583	contig_104598	122	98.55	69	1	0	42	69	28	1	6e-06
sil_3960864	contig_906096	117	97.1	69	2	0	39	69	178	208	1e-07
sil_3961341	contig_908442	122	98.55	69	1	0	42	69	48	21	6e-06
sil_4004058	contig_904530	122	98.55	69	1	0	39	69	230	260	1e-07
sil_4004982	contig_2197397	128	100	69	0	0	33	69	73	37	1e-07
sil_4008032	contig_916327	117	97.1	69	2	0	38	69	66	35	4e-08
sil_4008100	contig_935972	128	100	69	0	0	40	69	30	1	5e-07
sil_4008114	contig_921183	122	98.55	69	1	0	40	69	32	3	5e-07
sil_4008355	contig_2199636	128	100	69	0	0	40	69	41	12	5e-07
sil_4008653	contig_911575	117	97.1	69	2	0	38	69	288	319	4e-08
sil_4008811	contig_918043	122	98.55	69	1	0	40	69	44	15	5e-07
sil_4009736	contig_1219731	122	98.55	69	1	0	41	68	28	1	6e-06
sil_4329449	contig_8069	128	100	69	0	0	40	69	39	10	5e-07
sil_4396209	contig_972586	122	98.55	69	1	0	40	69	34	5	5e-07
sil_4405786	contig_928953	122	98.55	69	1	0	40	69	41	12	5e-07
sil_4406449	contig_914781	117	97.1	69	2	0	38	69	58	27	4e-08
sil_4407652	contig_928953	122	98.55	69	1	0	37	69	64	31	5e-07
sil_4407778	contig_2208437	122	98.55	69	1	0	40	69	32	3	5e-07
sil_4410456	contig_93784	122	98.55	69	1	0	40	69	53	24	5e-07
sil_4410650	contig_921912	128	100	69	0	0	27	69	58	15	6e-11
sil_4411795	contig_914781	117	97.1	69	2	0	31	69	39	2	4e-08
sil_4412191	contig_971479	122	98.55	69	1	0	42	69	39	12	6e-06
sil_4537735	contig_9348	122	98.55	69	1	0	40	69	175	204	5e-07
sil_4538451	contig_48909	117	97.1	69	2	0	40	69	62	33	5e-07
sil_4543893	contig_70501	122	98.55	69	1	0	40	69	36	7	5e-07
sil_4544266	contig_2198670	122	98.55	69	1	0	42	69	36	9	6e-06
sil_4733743	contig_1477994	122	98.55	69	1	0	42	69	34	7	6e-06
sil_4911036	contig_940140	128	100	69	0	0	40	69	44	15	5e-07
sil_4989387	contig_73824	122	98.55	69	1	0	40	69	46	17	5e-07
sil_4993939	contig_1954780	128	100	69	0	0	27	69	61	18	6e-11
sil_4993958	contig_2201947	128	100	69	0	0	40	69	32	3	5e-07
sil_4993966	contig_1128585	128	100	69	0	0	40	69	30	1	5e-07
sil_4993984	contig_2351830	128	100	69	0	0	40	69	323	352	5e-07
sil_4993987	contig_919340	128	100	69	0	0	40	69	307	336	5e-07
sil_4993989	contig_81573	128	100	69	0	0	40	69	41	12	5e-07
sil_4993998	contig_911748	121	98.55	69	0	1	40	69	153	182	5e-07
sil_4994007	contig_71039	128	100	69	0	0	30	69	42	3	6e-11
sil_4994017	contig_76651	128	100	69	0	0	30	69	184	223	6e-11
sil_4994049	contig_2198823	128	100	69	0	0	40	69	265	294	5e-07
sil_4994056	contig_49459	117	97.1	69	2	0	40	69	31	2	5e-07
sil_4994074	contig_939376	128	100	69	0	0	40	69	40	11	5e-07
sil_4994089	contig_2199682	128	100	69	0	0	40	69	36	7	5e-07
sil_4994107	contig_938649	122	98.55	69	1	0	42	69	46	19	6e-06
sil_4994120	contig_2208210	128	100	69	0	0	40	69	720	749	5e-07
sil_4994127	contig_929450	128	100	69	0	0	40	69	35	6	5e-07
sil_4994133	contig_933976	128	100	69	0	0	40	69	31	2	5e-07
sil_4994141	contig_932994	122	98.55	69	1	0	42	69	60	33	6e-06
sil_4994151	contig_2202477	115	97.1	69	0	1	29	69	878	918	2e-11
sil_4994156	contig_1017915	128	100	69	0	0	37	69	39	6	5e-07
sil_4994160	contig_1692272	128	100	69	0	0	40	69	523	552	5e-07
sil_4994212	contig_1014196	128	100	69	0	0	40	69	289	318	5e-07
sil_4994235	contig_11047	117	97.1	69	2	0	40	69	566	595	5e-07
sil_4994315	contig_85485	117	97.1	69	2	0	37	68	3404	3435	4e-08
sil_4994322	contig_2229048	128	100	69	0	0	34	69	508	543	5e-07
sil_4994353	contig_118690	128	100	69	0	0	30	69	42	4	5e-07
sil_4994363	contig_1006207	128	100	69	0	0	40	69	377	406	5e-07
sil_4994395	contig_915919	128	100	69	0	0	40	69	37	8	5e-07
sil_4994409	contig_913098	128	100	69	0	0	40	69	175	204	5e-07
sil_4994416	contig_105048	128	100	69	0	0	40	69	249	278	5e-07
sil_4994418	contig_2213906	128	100	69	0	0	40	69	37	8	5e-07
sil_4994425	contig_971846	128	100	69	0	0	40	69	878	907	5e-07
sil_4994428	contig_2218761	128	100	69	0	0	40	69	45	16	5e-07
sil_4994440	contig_94653	122	98.55	69	1	0	42	69	44	17	6e-06
sil_4994462	contig_912840	128	100	69	0	0	40	69	52	23	5e-07
sil_4994469	contig_923423	122	98.55	69	1	0	40	69	795	824	5e-07
sil_4994471	contig_2219970	128	100	69	0	0	40	69	56	27	5e-07
sil_4994501	contig_960725	128	100	69	0	0	30	69	65	26	6e-11
sil_4994514	contig_1426955	122	98.55	69	1	0	40	69	37	8	5e-07
sil_4994517	contig_909256	115	97.1	69	1	1	41	69	32	4	2e-06
sil_4994531	contig_1468164	128	100	69	0	0	40	69	30	1	5e-07
sil_4994532	contig_2230162	128	100	69	0	0	30	69	198	237	6e-11
sil_4994556	contig_2207829	117	97.1	69	2	0	40	69	162	191	5e-07
sil_4994560	contig_89477	117	97.1	69	2	0	40	69	33	4	5e-07
sil_4994596	contig_127798	128	100	69	0	0	40	69	182	211	5e-07
sil_4994598	contig_95586	128	100	69	0	0	30	69	194	233	6e-11
sil_4994614	contig_987492	128	100	69	0	0	40	69	188	217	5e-07
sil_4994627	contig_923199	128	100	69	0	0	40	69	56	27	5e-07
sil_4994638	contig_105007	128	100	69	0	0	30	69	57	18	6e-11
sil_4994643	contig_930927	128	100	69	0	0	40	69	35	6	5e-07
sil_4994646	contig_2197895	122	98.55	69	1	0	40	69	203	232	5e-07
sil_4994658	contig_954533	128	100	69	0	0	40	69	30	1	5e-07
sil_4994687	contig_945678	128	100	69	0	0	40	69	37	8	5e-07
sil_4994690	contig_925273	128	100	69	0	0	40	69	31	2	5e-07
sil_4994702	contig_25263	128	100	69	0	0	40	69	36	7	5e-07
sil_4994713	contig_1833578	128	100	69	0	0	40	69	50	21	5e-07
sil_4994718	contig_915930	128	100	69	0	0	40	69	36	7	5e-07
sil_4994726	contig_1689308	128	100	69	0	0	30	69	40	1	6e-11
sil_4994783	contig_8015	115	97.1	69	1	1	40	69	35	6	5e-07
sil_4994791	contig_113252	128	100	69	0	0	33	69	185	220	5e-07
sil_4994793	contig_2226118	128	100	69	0	0	30	69	43	4	6e-11
sil_4994794	contig_944513	128	100	69	0	0	40	69	49	20	5e-07
sil_4994804	contig_925825	122	98.55	69	1	0	40	69	177	206	5e-07
sil_4994807	contig_72660	122	98.55	69	1	0	40	69	200	229	5e-07
sil_4994811	contig_947103	128	100	69	0	0	40	69	201	230	5e-07
sil_4994888	contig_15386	128	100	69	0	0	27	69	53	11	6e-11
sil_4994932	contig_98285	122	98.55	69	1	0	40	69	208	237	5e-07
sil_4994944	contig_105857	121	98.55	69	0	1	41	69	51	23	2e-06
sil_4994965	contig_936921	128	100	69	0	0	23	69	57	12	6e-11
sil_4994978	contig_939273	128	100	69	0	0	40	69	179	208	5e-07
sil_4994979	contig_914293	128	100	69	0	0	40	69	38	9	5e-07
sil_4995012	contig_114460	128	100	69	0	0	40	69	43	14	5e-07
sil_4995049	contig_924204	128	100	69	0	0	40	69	197	226	5e-07
sil_4995055	contig_942050	128	100	69	0	0	30	69	43	4	6e-11
sil_4995074	contig_921680	128	100	69	0	0	40	69	37	8	5e-07
sil_4995080	contig_1002716	128	100	69	0	0	40	69	196	225	5e-07
sil_4995088	contig_910484	117	97.1	69	2	0	40	69	179	208	5e-07
sil_4995134	contig_966331	122	98.55	69	1	0	42	69	42	15	6e-06
sil_4995151	contig_1028320	128	100	69	0	0	40	69	32	3	5e-07
sil_4995168	contig_972311	128	100	69	0	0	40	69	221	250	5e-07
sil_4995189	contig_1282238	122	98.55	69	1	0	40	69	851	880	5e-07
sil_4995204	contig_993468	117	97.1	69	2	0	40	69	33	4	5e-07
sil_4995231	contig_973807	128	100	69	0	0	40	69	35	6	5e-07
sil_4995233	contig_960103	128	100	69	0	0	30	69	150	189	6e-11
sil_4995238	contig_927978	128	100	69	0	0	26	69	194	236	6e-11
sil_4995254	contig_2199480	128	100	69	0	0	40	69	74	45	5e-07
sil_4995262	contig_969196	128	100	69	0	0	40	69	179	208	5e-07
sil_4995276	contig_1656083	117	97.1	69	2	0	38	69	43	12	4e-08
sil_4995289	contig_919898	128	100	69	0	0	40	69	170	199	5e-07
sil_4995303	contig_1045797	128	100	69	0	0	40	69	191	220	5e-07
sil_4995367	contig_2229874	128	100	69	0	0	30	69	48	9	6e-11
sil_4995402	contig_73084	128	100	69	0	0	34	69	216	252	5e-07
sil_4995412	contig_929565	117	97.1	69	2	0	35	69	198	232	4e-08
sil_4995436	contig_2204587	128	100	69	0	0	40	69	269	298	5e-07
sil_4995442	contig_1479511	128	100	69	0	0	30	69	43	4	6e-11
sil_4995452	contig_85328	128	100	69	0	0	37	69	291	323	5e-07
sil_4995509	contig_2230401	122	98.55	69	1	0	40	69	259	288	5e-07
sil_4995546	contig_2199552	122	98.55	69	1	0	40	69	36	7	5e-07
sil_4995571	contig_905565	117	97.1	69	2	0	40	69	288	317	5e-07
sil_4995579	contig_935012	128	100	69	0	0	40	69	58	29	5e-07
sil_4995586	contig_1982640	128	100	69	0	0	37	69	45	13	5e-07
sil_4995596	contig_926660	117	97.1	69	2	0	40	69	50	21	5e-07
sil_4995601	contig_99004	128	100	69	0	0	40	69	183	212	5e-07
sil_4995607	contig_907425	128	100	69	0	0	30	69	181	220	6e-11
sil_4995624	contig_2223683	128	100	69	0	0	37	69	168	200	5e-07
sil_4995633	contig_135372	128	100	69	0	0	40	69	33	4	5e-07
sil_4995642	contig_71317	128	100	69	0	0	34	69	178	213	5e-07
sil_4995645	contig_11047	128	100	69	0	0	42	69	29	2	6e-06
sil_4995687	contig_1819333	117	97.1	69	2	0	38	69	36	5	4e-08
sil_4995724	contig_14441	128	100	69	0	0	40	69	43	14	5e-07
sil_4995745	contig_943094	128	100	69	0	0	30	69	45	6	6e-11
sil_4995760	contig_96279	128	100	69	0	0	40	69	36	7	5e-07
sil_4995773	contig_71605	117	97.1	69	2	0	34	69	239	274	5e-07
sil_4995779	contig_999847	128	100	69	0	0	27	69	46	3	6e-11
sil_4995786	contig_920903	128	100	69	0	0	40	69	163	192	5e-07
sil_4995841	contig_2196706	128	100	69	0	0	40	69	231	260	5e-07
sil_4995842	contig_2342692	122	98.55	69	1	0	40	69	184	213	5e-07
sil_4995848	contig_1000933	128	100	69	0	0	40	69	194	223	5e-07
sil_4995888	contig_112946	122	98.55	69	1	0	41	69	168	196	2e-06
sil_4995912	contig_918852	128	100	69	0	0	41	69	187	215	2e-06
sil_4995918	contig_930407	128	100	69	0	0	27	69	51	8	6e-11
sil_4995933	contig_929635	128	100	69	0	0	30	69	193	232	6e-11
sil_4996018	contig_2226972	122	98.55	69	1	0	42	69	33	6	6e-06
sil_4996049	contig_2199347	122	98.55	69	1	0	41	69	32	4	2e-06
sil_4996072	contig_2228286	128	100	69	0	0	41	69	42	14	2e-06
sil_4996111	contig_1036270	128	100	69	0	0	41	69	40	12	2e-06
sil_4996113	contig_1108709	128	100	69	0	0	41	69	244	272	2e-06
sil_4996134	contig_8819	128	100	69	0	0	41	69	348	376	2e-06
sil_4996159	contig_940568	128	100	69	0	0	41	69	43	15	2e-06
sil_4996171	contig_2221497	128	100	69	0	0	41	69	36	8	2e-06
sil_4996194	contig_45135	122	98.55	69	1	0	41	69	54	26	2e-06
sil_4996198	contig_929485	128	100	69	0	0	41	69	37	9	2e-06
sil_4996218	contig_912610	128	100	69	0	0	41	69	29	1	2e-06
sil_4996226	contig_953510	128	100	69	0	0	38	69	36	4	2e-06
sil_4996260	contig_94086	128	100	69	0	0	41	69	37	9	2e-06
sil_4996265	contig_1043836	122	98.55	69	1	0	41	69	58	30	2e-06
sil_4996268	contig_913520	117	97.1	69	2	0	41	69	36	8	2e-06
sil_4996292	contig_1329663	122	98.55	69	1	0	41	69	242	270	2e-06
sil_4996309	contig_915698	128	100	69	0	0	38	69	34	3	2e-06
sil_4996310	contig_101536	128	100	69	0	0	41	69	56	28	2e-06
sil_4996335	contig_1966425	128	100	69	0	0	30	69	203	242	6e-11
sil_4996346	contig_913552	128	100	69	0	0	41	69	32	4	2e-06
sil_4996349	contig_70775	128	100	69	0	0	30	69	51	12	6e-11
sil_4996386	contig_102191	128	100	69	0	0	30	69	228	267	6e-11
sil_4996390	contig_1822236	128	100	69	0	0	41	69	36	8	2e-06
sil_4996395	contig_914301	122	98.55	69	1	0	41	69	377	405	2e-06
sil_4996403	contig_968229	128	100	69	0	0	30	69	45	6	6e-11
sil_4996410	contig_1449228	128	100	69	0	0	30	69	41	2	6e-11
sil_4996425	contig_929561	128	100	69	0	0	38	69	51	19	2e-06
sil_4996434	contig_997101	128	100	69	0	0	41	69	37	9	2e-06
sil_4996462	contig_1042373	128	100	69	0	0	27	69	49	7	6e-11
sil_4996464	contig_22358	128	100	69	0	0	41	69	366	394	2e-06
sil_4996501	contig_917322	128	100	69	0	0	41	69	29	1	2e-06
sil_4996512	contig_991219	128	100	69	0	0	41	69	48	20	2e-06
sil_4996516	contig_86766	128	100	69	0	0	41	69	39	11	2e-06
sil_4996521	contig_84631	128	100	69	0	0	41	69	36	8	2e-06
sil_4996561	contig_908388	128	100	69	0	0	41	69	34	6	2e-06
sil_4996585	contig_2208210	128	100	69	0	0	41	69	46	18	2e-06
sil_4996626	contig_2238804	128	100	69	0	0	41	69	60	32	2e-06
sil_4996632	contig_981271	128	100	69	0	0	41	69	44	16	2e-06
sil_4996655	contig_1238654	128	100	69	0	0	30	69	188	227	6e-11
sil_4996675	contig_1048190	128	100	69	0	0	41	69	591	619	2e-06
sil_4996685	contig_1010151	117	97.1	69	2	0	38	69	163	194	4e-08
sil_4996693	contig_138733	128	100	69	0	0	38	69	33	1	2e-06
sil_4996695	contig_1935478	128	100	69	0	0	41	69	29	1	2e-06
sil_4996797	contig_1398512	128	100	69	0	0	30	69	180	219	6e-11
sil_4996798	contig_2203213	128	100	69	0	0	41	69	30	2	2e-06
sil_4996810	contig_35442	128	100	69	0	0	40	68	38	10	2e-06
sil_4996815	contig_1093655	128	100	69	0	0	30	69	48	9	6e-11
sil_4996820	contig_2198546	128	100	69	0	0	41	69	29	1	2e-06
sil_4996836	contig_938284	128	100	69	0	0	41	69	33	5	2e-06
sil_4996871	contig_927825	128	100	69	0	0	41	69	44	16	2e-06
sil_4996882	contig_978391	128	100	69	0	0	41	69	51	23	2e-06
sil_4996899	contig_890507	122	98.55	69	1	0	41	69	33	5	2e-06
sil_4996927	contig_912384	128	100	69	0	0	41	69	30	2	2e-06
sil_4996952	contig_1063574	128	100	69	0	0	27	69	200	243	6e-11
sil_4996956	contig_92330	128	100	69	0	0	41	69	35	7	2e-06
sil_4996957	contig_946039	128	100	69	0	0	38	69	41	9	2e-06
sil_4996962	contig_949473	128	100	69	0	0	41	69	38	10	2e-06
sil_4996965	contig_2224675	128	100	69	0	0	41	69	47	19	2e-06
sil_4996977	contig_331059	117	97.1	69	2	0	38	69	197	228	4e-08
sil_4997007	contig_74650	128	100	69	0	0	41	69	153	181	2e-06
sil_4997021	contig_104921	128	100	69	0	0	30	69	186	225	6e-11
sil_4997034	contig_70273	128	100	69	0	0	41	69	58	30	2e-06
sil_4997052	contig_1250844	128	100	69	0	0	40	68	29	1	2e-06
sil_4997068	contig_904508	122	98.55	69	1	0	41	69	32	4	2e-06
sil_4997074	contig_921948	128	100	69	0	0	29	69	62	21	2e-06
sil_4997079	contig_906989	128	100	69	0	0	41	69	47	19	2e-06
sil_4997090	contig_2339756	128	100	69	0	0	41	69	37	9	2e-06
sil_4997122	contig_1082446	128	100	69	0	0	41	69	36	8	2e-06
sil_4997123	contig_987820	122	98.55	69	1	0	40	68	29	1	2e-06
sil_4997147	contig_1629532	121	98.55	69	0	1	25	68	226	269	4e-13
sil_4997148	contig_2366658	128	100	69	0	0	41	69	51	23	2e-06
sil_4997149	contig_1261966	122	98.55	69	1	0	41	69	33	5	2e-06
sil_4997170	contig_98743	117	97.1	69	2	0	38	69	211	242	4e-08
sil_4997172	contig_943106	128	100	69	0	0	24	69	178	223	6e-11
sil_4997190	contig_936963	117	97.1	69	2	0	41	69	44	16	2e-06
sil_4997212	contig_1374319	128	100	69	0	0	41	69	206	234	2e-06
sil_4997218	contig_933488	122	98.55	69	1	0	38	69	36	4	2e-06
sil_4997248	contig_935762	122	98.55	69	1	0	41	69	75	47	2e-06
sil_4997263	contig_907432	117	97.1	69	2	0	41	69	33	5	2e-06
sil_4997276	contig_929359	128	100	69	0	0	41	69	29	1	2e-06
sil_4997295	contig_1324204	128	100	69	0	0	41	69	30	2	2e-06
sil_4997327	contig_1108707	128	100	69	0	0	41	69	217	245	2e-06
sil_4997429	contig_939775	117	97.1	69	2	0	38	69	231	262	4e-08
sil_4997458	contig_909386	128	100	69	0	0	41	69	279	307	2e-06
sil_4997462	contig_91904	128	100	69	0	0	41	69	45	17	2e-06
sil_4997482	contig_1015392	128	100	69	0	0	41	69	207	235	2e-06
sil_4997494	contig_1024878	128	100	69	0	0	41	69	30	2	2e-06
sil_4997522	contig_940713	121	98.55	69	0	1	14	66	238	290	4e-13
sil_4997528	contig_933473	128	100	69	0	0	41	69	34	6	2e-06
sil_4997577	contig_1821960	128	100	69	0	0	38	69	222	254	2e-06
sil_4997605	contig_955447	122	98.55	69	1	0	42	69	29	2	6e-06
sil_4997611	contig_74677	128	100	69	0	0	41	69	45	17	2e-06
sil_4997626	contig_1746002	128	100	69	0	0	38	69	319	351	2e-06
sil_4997676	contig_82726	128	100	69	0	0	41	69	37	9	2e-06
sil_4997678	contig_1433848	122	98.55	69	1	0	42	69	35	8	6e-06
sil_4997679	contig_954815	128	100	69	0	0	38	69	44	13	2e-06
sil_4997717	contig_907077	128	100	69	0	0	30	69	49	10	6e-11
sil_4997740	contig_915334	122	98.55	69	1	0	41	69	37	9	2e-06
sil_4997753	contig_2002515	122	98.55	69	1	0	41	69	42	14	2e-06
sil_4997754	contig_914180	128	100	69	0	0	41	69	41	13	2e-06
sil_4997764	contig_2204326	117	97.1	69	2	0	41	69	500	528	2e-06
sil_4997767	contig_9573	128	100	69	0	0	41	69	386	414	2e-06
sil_4997773	contig_72296	128	100	69	0	0	41	69	213	241	2e-06
sil_4997790	contig_2294281	128	100	69	0	0	30	69	56	17	6e-11
sil_4997796	contig_72136	128	100	69	0	0	26	69	59	17	6e-11
sil_4997807	contig_97542	128	100	69	0	0	41	69	52	24	2e-06
sil_4997823	contig_71537	128	100	69	0	0	41	69	39	11	2e-06
sil_4997826	contig_1252722	117	97.1	69	2	0	38	69	184	215	4e-08
sil_4997841	contig_13302	121	98.55	69	0	1	28	69	294	335	5e-12
sil_4997867	contig_115392	128	100	69	0	0	41	69	32	4	2e-06
sil_4997945	contig_107376	128	100	69	0	0	41	69	57	29	2e-06
sil_4998029	contig_919955	128	100	69	0	0	40	68	29	1	2e-06
sil_4998036	contig_20980	128	100	69	0	0	41	69	530	558	2e-06
sil_4998057	contig_1177102	128	100	69	0	0	41	69	29	1	2e-06
sil_4998087	contig_2227553	128	100	69	0	0	41	69	45	17	2e-06
sil_4998093	contig_1001133	128	100	69	0	0	41	69	49	21	2e-06
sil_4998094	contig_2234846	128	100	69	0	0	21	69	188	237	6e-11
sil_4998118	contig_912537	128	100	69	0	0	41	69	33	5	2e-06
sil_4998120	contig_2202250	121	98.55	69	0	1	28	69	43	2	5e-12
sil_4998122	contig_983427	128	100	69	0	0	41	69	247	275	2e-06
sil_4998144	contig_2222783	122	98.55	69	1	0	41	69	36	8	2e-06
sil_4998145	contig_920482	128	100	69	0	0	41	69	44	16	2e-06
sil_4998158	contig_923781	128	100	69	0	0	41	69	33	5	2e-06
sil_4998190	contig_938652	128	100	69	0	0	41	69	272	300	2e-06
sil_4998215	contig_932279	122	98.55	69	1	0	40	68	29	1	2e-06
sil_4998216	contig_104431	128	100	69	0	0	41	69	33	5	2e-06
sil_4998256	contig_906436	128	100	69	0	0	38	69	196	227	2e-06
sil_4998259	contig_86848	128	100	69	0	0	41	69	342	370	2e-06
sil_4998262	contig_904511	117	97.1	69	2	0	38	69	194	225	4e-08
sil_4998264	contig_9348	128	100	69	0	0	38	69	443	475	2e-06
sil_4998273	contig_995499	128	100	69	0	0	24	69	67	21	6e-11
sil_4998275	contig_974880	128	100	69	0	0	41	69	30	2	2e-06
sil_4998278	contig_958210	128	100	69	0	0	41	69	224	252	2e-06
sil_4998280	contig_2203994	128	100	69	0	0	41	69	302	330	2e-06
sil_4998287	contig_1449228	128	100	69	0	0	30	69	47	8	6e-11
sil_4998327	contig_2205704	128	100	69	0	0	41	69	30	2	2e-06
sil_4998343	contig_911875	128	100	69	0	0	41	69	46	18	2e-06
sil_4998374	contig_85577	128	100	69	0	0	27	69	45	3	6e-11
sil_4998386	contig_954279	122	98.55	69	1	0	41	69	43	15	2e-06
sil_4998391	contig_73355	128	100	69	0	0	41	69	32	4	2e-06
sil_4998409	contig_70252	117	97.1	69	2	0	41	69	502	530	2e-06
sil_4998456	contig_907513	128	100	69	0	0	41	69	38	10	2e-06
sil_4998466	contig_910927	128	100	69	0	0	41	69	294	322	2e-06
sil_4998472	contig_12016	117	97.1	69	2	0	41	69	54	26	2e-06
sil_4998495	contig_943181	128	100	69	0	0	41	69	245	273	2e-06
sil_4998513	contig_1557450	128	100	69	0	0	41	69	340	368	2e-06
sil_4998531	contig_913331	128	100	69	0	0	41	69	518	546	2e-06
sil_4998564	contig_74545	128	100	69	0	0	41	69	53	25	2e-06
sil_4998584	contig_914838	128	100	69	0	0	41	69	42	14	2e-06
sil_4998600	contig_127408	128	100	69	0	0	26	69	61	19	6e-11
sil_4998628	contig_74391	128	100	69	0	0	41	69	441	469	2e-06
sil_4998637	contig_2227263	128	100	69	0	0	41	69	31	3	2e-06
sil_4998723	contig_1173717	128	100	69	0	0	41	69	40	12	2e-06
sil_4998725	contig_79687	122	98.55	69	1	0	42	69	30	3	6e-06
sil_4998742	contig_915060	128	100	69	0	0	41	69	31	3	2e-06
sil_4998776	contig_92374	128	100	69	0	0	41	69	872	900	2e-06
sil_4998802	contig_915930	128	100	69	0	0	41	69	37	9	2e-06
sil_4998817	contig_1037149	128	100	69	0	0	35	69	613	647	2e-06
sil_4998821	contig_2232348	128	100	69	0	0	41	69	33	5	2e-06
sil_4998824	contig_911007	117	97.1	69	2	0	41	69	194	222	2e-06
sil_4998829	contig_983098	128	100	69	0	0	41	69	29	1	2e-06
sil_4998832	contig_933976	128	100	69	0	0	41	69	33	5	2e-06
sil_4998859	contig_991388	128	100	69	0	0	41	69	542	570	2e-06
sil_4998883	contig_905397	117	97.1	69	2	0	39	69	168	198	1e-07
sil_4998886	contig_83320	128	100	69	0	0	26	69	64	22	6e-11
sil_4998908	contig_1142785	128	100	69	0	0	41	69	45	17	2e-06
sil_4998937	contig_1661794	117	97.1	69	2	0	39	69	187	217	1e-07
sil_4998947	contig_910484	128	100	69	0	0	41	69	31	3	2e-06
sil_4998979	contig_13492	128	100	69	0	0	40	68	640	668	2e-06
sil_4999007	contig_1004109	128	100	69	0	0	30	69	65	26	6e-11
sil_4999042	contig_2201088	128	100	69	0	0	38	69	40	9	2e-06
sil_4999055	contig_925656	115	97.1	69	1	1	41	69	30	2	2e-06
sil_4999062	contig_2230162	128	100	69	0	0	24	69	67	21	6e-11
sil_4999067	contig_951754	128	100	69	0	0	41	69	648	676	2e-06
sil_4999113	contig_922776	128	100	69	0	0	41	69	271	299	2e-06
sil_4999168	contig_2197794	122	98.55	69	1	0	41	69	281	309	2e-06
sil_4999189	contig_931074	122	98.55	69	1	0	41	69	282	310	2e-06
sil_4999192	contig_1142785	117	97.1	69	2	0	41	69	270	298	2e-06
sil_4999197	contig_2206961	128	100	69	0	0	30	69	46	7	6e-11
sil_4999216	contig_2205388	128	100	69	0	0	30	69	224	263	6e-11
sil_4999241	contig_945729	117	97.1	69	2	0	38	68	31	1	1e-07
sil_4999243	contig_938805	128	100	69	0	0	26	69	543	585	6e-11
sil_4999248	contig_960617	117	97.1	69	2	0	32	69	40	2	2e-06
sil_4999270	contig_2198631	128	100	69	0	0	40	68	33	5	2e-06
sil_4999276	contig_912298	128	100	69	0	0	41	69	328	356	2e-06
sil_4999279	contig_911593	128	100	69	0	0	41	69	36	8	2e-06
sil_4999315	contig_85106	122	98.55	69	1	0	41	69	30	2	2e-06
sil_4999319	contig_1077304	128	100	69	0	0	41	69	56	28	2e-06
sil_4999336	contig_1552566	128	100	69	0	0	41	69	32	4	2e-06
sil_4999347	contig_1356397	128	100	69	0	0	41	69	1839	1867	2e-06
sil_4999355	contig_46081	115	97.1	69	0	1	29	69	45	5	2e-11
sil_4999384	contig_2198861	122	98.55	69	1	0	35	69	57	24	6e-06
sil_4999387	contig_2198255	128	100	69	0	0	30	69	952	991	6e-11
sil_4999390	contig_1119987	128	100	69	0	0	30	69	44	5	6e-11
sil_4999410	contig_2208317	128	100	69	0	0	38	69	584	615	2e-06
sil_4999417	contig_928133	128	100	69	0	0	41	69	44	16	2e-06
sil_4999441	contig_2196915	128	100	69	0	0	41	69	648	676	2e-06
sil_4999464	contig_943848	128	100	69	0	0	41	69	314	342	2e-06
sil_4999487	contig_34047	128	100	69	0	0	41	69	53	25	2e-06
sil_4999508	contig_914083	128	100	69	0	0	41	69	444	472	2e-06
sil_4999509	contig_975467	122	98.55	69	1	0	41	69	60	32	2e-06
sil_4999517	contig_945663	128	100	69	0	0	40	68	29	1	2e-06
sil_4999519	contig_8015	122	98.55	69	1	0	38	69	38	6	2e-06
sil_4999524	contig_2209021	128	100	69	0	0	41	69	29	1	2e-06
sil_4999533	contig_925705	128	100	69	0	0	41	69	45	17	2e-06
sil_4999543	contig_927113	121	98.55	69	0	1	41	69	187	215	2e-06
sil_4999568	contig_75262	128	100	69	0	0	41	69	66	38	2e-06
sil_4999591	contig_930531	128	100	69	0	0	1	64	2734	2671	1e-22
sil_4999611	contig_2316831	128	100	69	0	0	30	69	42	3	6e-11
sil_4999639	contig_2198128	128	100	69	0	0	1	64	129	66	6e-26
sil_4999645	contig_2201772	122	98.55	69	1	0	42	69	29	2	6e-06
sil_4999648	contig_942711	122	98.55	69	1	0	42	69	33	6	6e-06
sil_4999658	contig_10333	117	97.1	69	2	0	1	64	294	231	3e-24
sil_4999664	contig_10552	128	100	69	0	0	1	64	129	66	1e-22
sil_4999668	contig_75670	128	100	69	0	0	1	62	781	720	4e-13
sil_4999685	contig_104111	128	100	69	0	0	5	62	1884	1827	6e-11
sil_4999703	contig_969378	128	100	69	0	0	33	69	43	7	6e-11
sil_4999719	contig_27824	128	100	69	0	0	34	69	211	246	2e-10
sil_4999721	contig_1022089	128	100	69	0	0	34	69	42	7	2e-10
sil_4999735	contig_72990	128	100	69	0	0	32	69	43	5	8e-10
sil_4999739	contig_925539	128	100	69	0	0	28	67	828	867	6e-11
sil_4999740	contig_2217707	128	100	69	0	0	27	69	45	2	6e-11
sil_4999742	contig_920638	117	97.1	69	2	0	35	69	38	4	8e-10
sil_4999756	contig_20339	128	100	69	0	0	32	69	48	10	8e-10
sil_4999758	contig_2270791	128	100	69	0	0	35	69	60	26	8e-10
sil_4999766	contig_944285	128	100	69	0	0	32	69	176	213	8e-10
sil_4999772	contig_2212572	128	100	69	0	0	30	69	45	6	6e-11
sil_4999785	contig_942791	122	98.55	69	1	0	21	69	57	9	3e-09
sil_4999788	contig_918505	128	100	69	0	0	16	66	47	1	3e-09
sil_4999810	contig_2203076	128	100	69	0	0	33	69	61	25	3e-09
sil_5000044	contig_2232703	128	100	69	0	0	36	69	194	227	3e-09
sil_5000233	contig_2210202	122	98.55	69	1	0	34	69	46	11	1e-08
sil_5000277	contig_1078494	128	100	69	0	0	34	69	52	16	1e-08
[truncated: 1,657 more rows]

## Sheet: c) MTA position
Table S4_c. Physical position on T. urartu contigs and T. monococcum genome assigned to peak markers (mapped and unmapped on bread wheat genome)
trait	marker	T. urartu_genome (Chr.bp)	TGAC_WGS_monococcum_v1	on bread wheat genome
AWN	SIL_1018217	Chr.5 (521996727-521996659)	contig_38447	mapped
AWN	SIL_1057454	--	contig_71347	mapped
AWN	SIL_1076069	--	--	mapped
AWN	SIL_1218444	--	--	mapped
AWN	SIL_994309	--	--	mapped
AWN	SNP_1364455	Chr.5 (453784366-453784434)	contig_913593	mapped
AWN	SNP_3574217	--	contig_931980	mapped
CAR	SIL_4994928	--	--	mapped
CAR	SIL_5002344	--	contig_937866	mapped
CAR	SNP_981918	--	contig_937866	mapped
GLC	SIL_1067890	--	--	mapped
GLC	SIL_1202445	--	contig_919325	mapped
GLC	SIL_1281357	Chr.5 (406060120-406060052)	--	mapped
GLC	SIL_4409943	--	--	mapped
GLC	SNP_2243185	--	contig_14849	mapped
GLC	SNP_2290270	Chr.1 (524599930-524599862)	contig_915698	mapped
GLH	SIL_1057186	--	--	mapped
GLH	SIL_1093609	--	--	mapped
GLH	SIL_1122236	--	contig_1982446	mapped
GLH	SIL_1202938	Chr.4 (551837790-551837722)	contig_950548	mapped
GLH	SIL_1218444	--	--	mapped
GLH	SIL_1267588	--	--	mapped
GLH	SIL_1723678	--	--	mapped
GLH	SIL_2244521	Chr.7 (599224560-599224493)	--	mapped
GLH	SIL_2262791	Chr.1 (574794094-574794162)	contig_71411	mapped
GLH	SIL_2275401	Chr.1 (571526254-571526186)	contig_2201918	mapped
GLH	SIL_2276183	Chr.1 (417227082-417227014)	contig_950054	mapped
GLH	SIL_2301074	--	--	mapped
GLH	SIL_3571520	Chr.4 (551813775-551813842)	--	mapped
GLH	SIL_979056	Chr.5 (225716776-225716844)	contig_133979	mapped
GLH	SNP_100010183	Chr.1 (474688846-474688779)	contig_1618692	mapped
GLH	SNP_100017762	Chr.1 (480880200-480880132)	contig_2198547	mapped
GLH	SNP_100057721	Chr.1 (529056914-529056982)	contig_918963	mapped
GLH	SNP_1066673	Chr.1 (529924861-529924929)	contig_941876	mapped
GLH	SNP_1190777	--	contig_8701	mapped
GLH	SNP_2277818	--	contig_944424	mapped
GLH	SNP_2298023	Chr.1 (533574566-533574633)	contig_922211	mapped
GLH	SNP_3572864	--	contig_104207	mapped
GRT	SIL_2247447	Chr.5 (621941737-621941805)	--	mapped
GRW	SIL_1081679	--	contig_915011	mapped
GRW	SIL_3572989	Chr.6 (541652706-541652774)	contig_2210191	mapped
HDA	SIL_5003498	Chr.7 (111613111-111613179)	--	mapped
HDA	SIL_5006335	Chr.2 (536820809-536820877)	contig_956364	mapped
HDA	SNP_3949514	Chr.2 (473233235-473233303)	contig_8907	mapped
PLH	SIL_1092630	--	--	mapped
PLH	SIL_1204105	--	contig_2201755	mapped
PLH	SIL_3064362	Chr.3 (635622864-635622932)	--	mapped
PLH	SIL_4396019	--	contig_94221	mapped
PLH	SIL_982983	Chr.5 (437981514-437981581)	contig_94221	mapped
PLH	SNP_100111691	Chr.5 (386552181-386552249)	contig_923947	mapped
PLH	SNP_1079639	Chr.3 (661956946-661956878)	contig_923955	mapped
PLH	SNP_2293071	Chr.3 (638932532-638932464)	contig_70402	mapped
PLH	SNP_994119	Chr.7 (538554742-538554810)	contig_9960	mapped
PRO	SIL_1125220	--	contig_957040	mapped
PRO	SIL_3575496	Chr.1 (290484933-290484866)	contig_75683	mapped
PRO	SIL_994309	--	--	mapped
PRO	SNP_3574217	--	contig_931980	mapped
SDS	SIL_3575693	--	contig_1017063	mapped
SDS	SNP_100018797	--	contig_946621	mapped
SDS	SNP_1025773	Chr.5 (621716882-621716950)	contig_906518	mapped
SDS	SNP_1088712	Chr.6 (549329689-549329757)	contig_84133	mapped
SPS	SIL_1063095	Chr.5 (43068149-43068081)	contig_2201088	mapped
SPS	SNP_996521	Chr.7 (462134934-462135002)	contig_84493	mapped
AWN	SIL_1017192	--	--	un-mapped
AWN	SIL_1086094	--	--	un-mapped
AWN	SIL_1130713	--	--	un-mapped
AWN	SIL_1242835	--	--	un-mapped
AWN	SIL_1751768	--	contig_105493	un-mapped
AWN	SIL_3064873	--	--	un-mapped
AWN	SIL_3570711	--	--	un-mapped
AWN	SIL_3571392	Chr.1 (246760805-246760737)	--	un-mapped
AWN	SIL_3571622	--	--	un-mapped
AWN	SIL_3573108	--	--	un-mapped
AWN	SIL_3945515	--	--	un-mapped
AWN	SIL_3949618	--	--	un-mapped
AWN	SIL_3949962	--	--	un-mapped
AWN	SIL_3953508	--	--	un-mapped
AWN	SIL_3956078	--	--	un-mapped
AWN	SIL_3957157	--	--	un-mapped
AWN	SIL_3957425	--	--	un-mapped
AWN	SIL_3959325	--	--	un-mapped
AWN	SIL_4009648	--	--	un-mapped
AWN	SIL_4262513	--	--	un-mapped
AWN	SIL_4993998	--	contig_911748	un-mapped
AWN	SIL_4996388	--	--	un-mapped
AWN	SIL_4996754	--	--	un-mapped
AWN	SIL_4997414	--	--	un-mapped
AWN	SIL_4997831	--	contig_937623	un-mapped
AWN	SIL_4998250	--	--	un-mapped
AWN	SIL_4998368	--	--	un-mapped
AWN	SIL_4999212	--	--	un-mapped
AWN	SIL_5002129	--	--	un-mapped
AWN	SIL_5005132	--	--	un-mapped
AWN	SIL_5005559	--	--	un-mapped
AWN	SIL_5005989	--	--	un-mapped
AWN	SIL_5007924	--	--	un-mapped
AWN	SNP_100005724a	--	--	un-mapped
AWN	SNP_100008002	--	--	un-mapped
AWN	SNP_100023109a	--	--	un-mapped
AWN	SNP_1090200a	--	--	un-mapped
AWN	SNP_1127590a	--	--	un-mapped
AWN	SNP_1215108a	--	--	un-mapped
AWN	SNP_3570253	--	contig_947902	un-mapped
AWN	SNP_3571900	--	contig_930901	un-mapped
AWN	SNP_3949701	--	--	un-mapped
CAR	SIL_1052236	--	--	un-mapped
CAR	SIL_1207796	--	--	un-mapped
CAR	SIL_4008216	--	--	un-mapped
CAR	SIL_4994905	--	--	un-mapped
CAR	SNP_100004567	--	--	un-mapped
CAR	SNP_1113733	--	--	un-mapped
CAR	SNP_3574303	--	--	un-mapped
GLC	SIL_1085190	--	--	un-mapped
GLC	SIL_1122065	--	contig_905814	un-mapped
GLC	SIL_1262006	--	contig_1024949	un-mapped
GLC	SIL_1306819	--	--	un-mapped
GLC	SIL_1721889	--	--	un-mapped
GLC	SIL_3534424	--	--	un-mapped
GLC	SIL_3570668	Chr.1 (8864414-8864482)	--	un-mapped
GLC	SIL_3571049	--	--	un-mapped
GLC	SIL_3571284	--	--	un-mapped
GLC	SIL_3571974	--	--	un-mapped
GLC	SIL_3572053	--	--	un-mapped
GLC	SIL_3575230	--	contig_969544	un-mapped
GLC	SIL_3575516	--	--	un-mapped
GLC	SIL_3935864	--	--	un-mapped
GLC	SIL_3937667	--	--	un-mapped
GLC	SIL_3943719	--	--	un-mapped
GLC	SIL_3946143	--	--	un-mapped
GLC	SIL_3949255	--	--	un-mapped
GLC	SIL_3957798	--	--	un-mapped
GLC	SIL_4394244	--	--	un-mapped
GLC	SIL_4396280	--	--	un-mapped
GLC	SIL_4994142	--	--	un-mapped
GLC	SIL_4994888	--	contig_15386	un-mapped
GLC	SIL_4996309	--	contig_915698	un-mapped
GLC	SIL_4996547	--	--	un-mapped
GLC	SIL_4997539	--	--	un-mapped
GLC	SIL_4997786	--	contig_15386	un-mapped
GLC	SIL_4998597	--	--	un-mapped
GLC	SIL_4999399	--	--	un-mapped
GLC	SIL_5003117	--	--	un-mapped
GLC	SIL_5003984	--	--	un-mapped
GLC	SIL_5004657	--	--	un-mapped
GLC	SIL_5005814	--	--	un-mapped
GLC	SIL_5006309	--	--	un-mapped
GLC	SIL_5009069	--	--	un-mapped
GLC	SIL_5009968	--	--	un-mapped
GLC	SIL_5010198	--	--	un-mapped
GLC	SNP_100001467	--	--	un-mapped
GLC	SNP_100004074	--	contig_945607	un-mapped
GLC	SNP_1043336a	--	--	un-mapped
GLH	SIL_1046581	--	--	un-mapped
GLH	SIL_1088246	--	--	un-mapped
GLH	SIL_1088539	--	--	un-mapped
GLH	SIL_1158977	--	--	un-mapped
GLH	SIL_1163177	--	--	un-mapped
GLH	SIL_1251432	--	--	un-mapped
GLH	SIL_1262006	--	contig_1024949	un-mapped
GLH	SIL_1723079	--	--	un-mapped
GLH	SIL_1723680	--	--	un-mapped
GLH	SIL_1769152	Chr.7 (556321272-556321337)	--	un-mapped
GLH	SIL_1861917	--	--	un-mapped
GLH	SIL_2287160	--	--	un-mapped
GLH	SIL_2289029	--	contig_986669	un-mapped
GLH	SIL_3022685	--	--	un-mapped
GLH	SIL_3025109	--	--	un-mapped
GLH	SIL_3026054	--	--	un-mapped
GLH	SIL_3534005	--	--	un-mapped
GLH	SIL_3570657	--	--	un-mapped
GLH	SIL_3571221	--	--	un-mapped
GLH	SIL_3571377	--	--	un-mapped
GLH	SIL_3571381	--	--	un-mapped
GLH	SIL_3571614	--	--	un-mapped
GLH	SIL_3571717	--	contig_12257	un-mapped
GLH	SIL_3571844	--	--	un-mapped
GLH	SIL_3572010	--	--	un-mapped
GLH	SIL_3572053	--	--	un-mapped
GLH	SIL_3572440	Chr.1 (543880919-543880987)	--	un-mapped
GLH	SIL_3573016	--	contig_2209600	un-mapped
GLH	SIL_3573090	--	--	un-mapped
GLH	SIL_3573441	--	--	un-mapped
GLH	SIL_3573661	--	--	un-mapped
GLH	SIL_3573741	--	--	un-mapped
GLH	SIL_3574026	--	contig_12257	un-mapped
GLH	SIL_3575081	--	--	un-mapped
GLH	SIL_3575427	--	--	un-mapped
GLH	SIL_3575516	--	--	un-mapped
GLH	SIL_3934960	--	--	un-mapped
GLH	SIL_3944161	--	--	un-mapped
GLH	SIL_3955268	--	--	un-mapped
GLH	SIL_3957698	--	--	un-mapped
GLH	SIL_3958444	--	--	un-mapped
GLH	SIL_4002513	--	--	un-mapped
GLH	SIL_4003320	--	--	un-mapped
GLH	SIL_4008806	--	--	un-mapped
GLH	SIL_4019948	--	--	un-mapped
GLH	SIL_4394938	--	--	un-mapped
GLH	SIL_4396310	--	--	un-mapped
GLH	SIL_4397470	--	--	un-mapped
GLH	SIL_4992295	--	--	un-mapped
GLH	SIL_4993998	--	contig_911748	un-mapped
GLH	SIL_4994891	--	--	un-mapped
GLH	SIL_4994933	--	--	un-mapped
GLH	SIL_4995363	--	--	un-mapped
GLH	SIL_4995607	--	contig_907425	un-mapped
GLH	SIL_4996018	--	contig_2226972	un-mapped
GLH	SIL_4996124	--	--	un-mapped
GLH	SIL_4996647	--	--	un-mapped
GLH	SIL_4996662	--	--	un-mapped
GLH	SIL_4997189	--	--	un-mapped
GLH	SIL_4998398	--	--	un-mapped
GLH	SIL_4998630	--	--	un-mapped
GLH	SIL_4998976	--	--	un-mapped
GLH	SIL_5002716	--	--	un-mapped
GLH	SIL_5003073	--	--	un-mapped
GLH	SIL_5003850	--	--	un-mapped
GLH	SIL_5005159	--	--	un-mapped
GLH	SIL_5005601	--	--	un-mapped
GLH	SIL_5005877	--	--	un-mapped
GLH	SIL_5007210	--	--	un-mapped
GLH	SIL_5007217	--	--	un-mapped
GLH	SIL_5007391	--	--	un-mapped
GLH	SIL_5007748	--	--	un-mapped
GLH	SIL_5007801	--	--	un-mapped
GLH	SIL_5008331	--	--	un-mapped
GLH	SIL_5008904	--	--	un-mapped
GLH	SIL_5009063	--	--	un-mapped
GLH	SIL_5010095	--	--	un-mapped
GLH	SIL_5010198	--	--	un-mapped
GLH	SIL_5010218	--	--	un-mapped
GLH	SIL_5010317	--	--	un-mapped
GLH	SIL_978138	--	--	un-mapped
GLH	SNP_100001412	--	--	un-mapped
GLH	SNP_100001598	--	contig_71060	un-mapped
GLH	SNP_100002328	--	--	un-mapped
GLH	SNP_100002570	--	contig_106016	un-mapped
GLH	SNP_100003069	Chr.1 (476891657-476891589)	contig_946364	un-mapped
GLH	SNP_100003151	--	--	un-mapped
GLH	SNP_100003984	--	contig_907880	un-mapped
GLH	SNP_100004576	--	contig_1053540	un-mapped
GLH	SNP_100005108	--	--	un-mapped
GLH	SNP_100012846	--	--	un-mapped
GLH	SNP_100013690	--	--	un-mapped
GLH	SNP_100063935	--	contig_1845216	un-mapped
GLH	SNP_1229948	--	--	un-mapped
GLH	SNP_1315134	--	contig_9886	un-mapped
GLH	SNP_2276636	Chr.1 (480695856-480695790)	--	un-mapped
GLH	SNP_3574265	--	contig_936138	un-mapped
GLH	SNP_3574505	--	--	un-mapped
GLH	SNP_3574511	--	contig_918722	un-mapped
GLH	SNP_3574797	--	contig_1605090	un-mapped
GLH	SNP_3574892	--	--	un-mapped
GLH	SNP_3575099	Chr.5 (43193393-43193325)	contig_1006009	un-mapped
GLH	SNP_4003014	--	--	un-mapped
GLH	SNP_996450a	--	--	un-mapped
GRL	SIL_3028700	--	--	un-mapped
GRL	SNP_1220195	--	--	un-mapped
GRT	SIL_3570511	--	--	un-mapped
GRT	SIL_4008806	--	--	un-mapped
GRT	SIL_4398103	--	--	un-mapped
GRT	SIL_5001732	--	--	un-mapped
GRT	SNP_100027932	--	contig_906595	un-mapped
GRW	SIL_1080142	--	--	un-mapped
GRW	SIL_3571169	--	--	un-mapped
GRW	SNP_100009155	Chr.7 (67464716-67464648)	contig_963364	un-mapped
HDA	SIL_1049252	--	--	un-mapped
HDA	SIL_1207796	--	--	un-mapped
HDA	SIL_3571152	Chr.5 (604199340-604199273)	--	un-mapped
HDA	SIL_3572886	Chr.5 (559200188-559200256)	--	un-mapped
HDA	SIL_3573661	--	--	un-mapped
HDA	SIL_4997499	--	--	un-mapped
HDA	SIL_5009684	--	--	un-mapped
HDA	SNP_100063935	--	contig_1845216	un-mapped
PLH	SNP_999525	--	contig_2243014	mapped
PLH	SIL_1103494	Chr.1 (505443992-505444057)	--	un-mapped
PLH	SIL_1131885	--	--	un-mapped
PLH	SIL_2308629	--	--	un-mapped
PLH	SIL_2320230	--	--	un-mapped
PLH	SIL_3947497	--	--	un-mapped
PLH	SIL_4995206	--	--	un-mapped
PLH	SIL_4999766	Chr.6 (206422540-206422472)	contig_944285	un-mapped
PLH	SIL_5004293	--	--	un-mapped
PLH	SIL_5005029	--	--	un-mapped
PLH	SIL_5009354	--	--	un-mapped
PLH	SNP_100002975	--	--	un-mapped
PLH	SNP_100005002	--	contig_11116	un-mapped
PLH	SNP_1068423	--	--	un-mapped
PLH	SNP_1125980	--	contig_2223326	un-mapped
PLH	SNP_1132581	--	--	un-mapped
PLH	SNP_1695268a	--	--	un-mapped
PLH	SNP_1695268b	--	--	un-mapped
PLH	SNP_1763092	--	contig_918541	un-mapped
PLH	SNP_2289441	Chr.3 (639060043-639059975)	contig_1002930	un-mapped
PLH	SNP_3024434a	--	--	un-mapped
PLH	SNP_3574202	--	--	un-mapped
PLH	SNP_4541395	--	--	un-mapped
PRO	SIL_3573108	--	--	un-mapped
PRO	SIL_3957016	--	--	un-mapped
PRO	SIL_3959735	--	--	un-mapped
PRO	SIL_4997475	--	--	un-mapped
PRO	SIL_5005559	--	--	un-mapped
PRO	SIL_5006217	--	--	un-mapped
RAB	SIL_1862146	--	--	un-mapped
RAB	SIL_4994965	--	contig_936921	un-mapped
RAB	SIL_5010239	--	contig_2237593	un-mapped
SDS	SIL_1222197	--	--	un-mapped
SDS	SIL_1298613	--	--	un-mapped
SDS	SIL_3570934	--	--	un-mapped
SDS	SIL_3575644	--	--	un-mapped
SDS	SIL_3947586	--	--	un-mapped
SDS	SIL_4995048	--	--	un-mapped
SDS	SIL_4995486	Chr.4 (612689389-612689321)	--	un-mapped
SDS	SIL_4996632	Chr.4 (89309238-89309306)	contig_981271	un-mapped
SDS	SIL_4997426	--	--	un-mapped
SDS	SIL_4997999	--	--	un-mapped
SDS	SIL_4998178	--	--	un-mapped
SDS	SIL_4998597	--	--	un-mapped
SDS	SIL_5002619	--	--	un-mapped
SDS	SIL_5006298	--	--	un-mapped
SDS	SIL_5007179	--	--	un-mapped
SDS	SIL_5010553	Chr.4 (612689389-612689321)	--	un-mapped
SDS	SIL_5010721	--	--	un-mapped
SDS	SNP_100000988	--	contig_921678	un-mapped
SDS	SNP_1159443	--	contig_2199636	un-mapped
SDS	SNP_4541395	--	--	un-mapped
SPL	SIL_4999766	Chr.6 (206422540-206422472)	contig_944285	un-mapped
SPL	SIL_5002526	--	--	un-mapped
SPL	SIL_5002945	--	--	un-mapped
SPL	SIL_5009428	--	--	un-mapped
SPL	SNP_100011379	--	contig_904843	un-mapped
SPS	SIL_1094861	--	--	un-mapped
SPS	SIL_3533819	--	--	un-mapped
SPS	SIL_3572886	Chr.5 (559200188-559200256)	--	un-mapped
SPS	SIL_4994107	--	contig_938649	un-mapped
SPS	SIL_4999440	--	--	un-mapped
TGW	SIL_3028492	--	--	un-mapped

## Sheet: d) marker ass.d to mult. trai 
Table S4_d. Markers associated to multiple traits and physical position on the three considered genomes
traits	marker	T. urartu_genome (Chr.bp)	TGAC_WGS_monococcum_v1	on bread wheat genome
CAR-HDA	SIL_1207796	--	--	un-mapped
AWN-GLH	SIL_1218444	--	--	mapped
AWN-GLH	SIL_4993998	--	contig_911748	un-mapped
AWN-PRO	SNP_3574217	--	contig_931980	mapped
AWN-PRO	SIL_994309	--	--	mapped
AWN-PRO	SIL_3573108	--	--	un-mapped
AWN-PRO	SIL_5005559	--	--	un-mapped
HDA-SPS	SIL_3572886	Chr.5 (559200188-559200256)	--	un-mapped
GLH-HDA	SIL_3573661	--	--	un-mapped
GLH-HDA	SNP_100063935	--	contig_1845216	un-mapped
GLC-GLH	SIL_3575516	--	--	un-mapped
GLC-GLH	SIL_5010198	--	--	un-mapped
GLC-GLH	SIL_1262006	--	contig_1024949	un-mapped
GLC-GLH	SIL_3572053	--	--	un-mapped
GLH-GRT	SIL_4008806	--	--	un-mapped
GLC-SDS	SIL_4998597	--	--	un-mapped
PLH-SPL	SIL_4999766	Chr.6 (206422540-206422472)	contig_944285	un-mapped
PLH-SDS	SNP_4541395	--	--	un-mapped
