# Supplementary material
Source: publisher figshare collection journal article supplement (https://gsajournals.figshare.com/articles/dataset/_/14975118)
Supplement: Supplementary file 1 [file 1]

Genome-wide association study for morphological, phenological, quality and yield traits in einkorn (*Triticum monococcum* L. subsp. *monococcum*)

Andrea Volante<sup>1\*</sup>, Delfina Barabaschi<sup>2</sup>, Rosanna Marino<sup>3</sup>, Andrea Brandolini<sup>4</sup>

<sup>1</sup> Council for Agricultural Research and Economics–Research Centre for Cereal and Industrial Crops. E-mail: andrea.volante@crea.gov.it. ORCID: 0000-0002-0463-5375

<sup>2</sup> Council for Agricultural Research and Economics–Research Centre for Genomics and Bioinformatics. E-mail: delfina.barabaschi@crea.gov.it. ORCID: 0000-0002-1107-0210

<sup>3</sup> Council for Agricultural Research and Economics–Research Centre for Animal Production and Aquaculture. E-mail: rosanna.marino@crea.gov.it. ORCID: 0000-0002-5868-6696

<sup>4</sup> Council for Agricultural Research and Economics–Research Centre for Animal Production and Aquaculture. E-mail: andrea.brandolini@crea.gov.it. ORCID: 0000-0002-4552-4081

\* Corresponding author

**File S1.** Analysis of Variance (ANOVA) of the phenotypic data

| Source       | d.f. | HDA         | PLH         | SPS        | GPS      | SPL      | GRL      | GRW       | GRT       | TGW        | PRO        | CAR        | SDS        |
|--------------|------|-------------|-------------|------------|----------|----------|----------|-----------|-----------|------------|------------|------------|------------|
| Genotype (G) | 159  | 271.16***   | 778.18***   | 57.02***   | 0.108*** | 3.84***  | 0.962*** | 0.256***  | 0.180***  | 104.26***  | 12.946***  | 12.570***  | 451.66***  |
| Year (Y)     | 3    | 13891.80*** | 108839.0*** | 4570.43*** | 3.765*** | 68.42*** | 22.43*** | 11.473*** | 14.499*** | 1904.23*** | 255.209*** | 144.646*** | 4031.02*** |
| GxY          | 477  | 16.04***    | 136.56***   | 8.88       | 0.034*** | 0.753    | 0.126    | 0.057     | 0.041     | 14.88**    | 2.648      | 1.659***   | 39.50***   |
| Error        | 640  | 6.54        | 165.78      | 8.68       | 0.028    | 0.689    | 0.123    | 0.058     | 0.051     | 12.05      | 3.125      | 1.042      | 24.28      |

| Source       | d.f. | AWN      | GLC       | GLH      | RAB       |
|--------------|------|----------|-----------|----------|-----------|
| Genotype (G) | 159  | 0.768*** | 1.516***  | 0.380*** | 1.178***  |
| Year (Y)     | 3    | 3.402*** | 16.150*** | 6.159*** | 15.890*** |
| GxY          | 477  | 0.125*** | 0.548***  | 0.183*** | 0.281**   |
| Error        | 640  | 0.086    | 0.190     | 0.020    | 0.220     |

d.f.: degrees of freedom; \*\*\*:  $p \leq 0.001$ . HDA: heading date; PLH: plant height; SPS: n° spikelets/spike; GPS: n° kernels/spikelet; SPL: spike length; GRL: grain length; GRW: grain width; GRT: grain thickness; TGW: thousand kernels weight; PRO: protein content; CAR: carotenoid content; SDS: sodium dodecyl sulphate sedimentation volume; AWN: awns length; GLC: glume color; GLH: glume hairiness; RAB: rachis brittleness.
